# Supplementary material for: PARP10 is highly expressed and associated with inferior outcomes in acute myeloid leukemia
Source: publisher site journal article supplement (doi:10.18632/aging.204832), 2023-07-27
Supplement: Supplementary file [file aging-v15i14-204832-supplementary-material-SD3.pdf]

## SUPPLEMENTARY TABLE

Supplementary Table 4. Oligo sequences of *PARP10* guide RNAs and genotyping primers.

---

| <b>1. Oligo sequences for <i>PARP10</i> guide RNAs</b> |                           |
|--------------------------------------------------------|---------------------------|
| sgRNA1-F                                               | caccGCAGCTCGTCGGGCACGGCA  |
| sgRNA1-R                                               | AAACTGCCGTGCCCGACGAGCTGC  |
| sgRNA2-F                                               | caccgTTTGAAAACCGCCGACGCTC |
| sgRNA2-R                                               | AAACGAGCGTCGGCGGTTTTCAAAC |

---

| <b>2. Genotyping primers for validation of <i>PARP10</i> editing mediated by CRISPR/Cas9</b> |                         |
|----------------------------------------------------------------------------------------------|-------------------------|
| genotyping-F                                                                                 | GCAGGATGTCAGGCATTAGAATA |
| genotyping-R                                                                                 | GGGAGCATTGAGGACACACCTTG |

---
