# Supplementary material for: PARP10 is highly expressed and associated with inferior outcomes in acute myeloid leukemia
Source: Aging (Albany NY). 2023 Jul 27;15(14):6757–73. doi: 10.18632/aging.204832 (PMC10415541; doi:10.18632/aging.204832)
Supplement: Supplementary Tables 1-3 [file aging-15-204832-s002.xlsx]

## Sheet: Supplementary Table 1
Supplementary Table 1. Gene co-expression analysis of PARP10 from cBioportal database
Correlated Gene	Cytoband	Spearman's Correlation	p-Value	q-Value
ABHD17A	19p13.3	0.727443	8.92127e-30	9.89184e-26
PACS2	14q32.33	0.726351	1.19129e-29	9.89184e-26
APBA3	19p13.3	0.722298	3.44445e-29	1.90673e-25
MFSD12	19p13.3	0.719447	7.18666e-29	2.98372e-25
SIPA1	11q13.1	0.716585	1.49032e-28	4.94994e-25
PKN1	19p13.12	0.71219	4.48777e-28	1.24214e-24
USF2	19q13.12	0.710758	6.3995e-28	1.51824e-24
SSBP4	19p13.11	0.707383	1.46407e-27	3.03922e-24
SLC25A22	11p15.5	0.700623	7.4211e-27	1.23716e-23
CIC	19q13.2	0.700606	7.44965e-27	1.23716e-23
CAPN10	2q37.3	0.692186	5.28267e-26	7.9754e-23
DVL1	1p36.33	0.691563	6.09096e-26	8.42939e-23
RBCK1	20p13	0.690758	7.31503e-26	9.34467e-23
PLEKHM2	1p36.21	0.682436	4.70191e-25	5.57748e-22
SHARPIN	8q24.3	0.680194	7.67913e-25	8.50182e-22
RNF31	14q12	0.677487	1.38076e-24	1.43314e-21
SUPT5H	19q13.2	0.676486	1.71267e-24	1.67308e-21
FBXW4	10q24.32	0.675482	2.12362e-24	1.95928e-21
MAP3K11	11q13.1	0.672314	4.16441e-24	3.63992e-21
ATG2A	11q13.1	0.66719	1.21626e-23	9.9182e-21
BTBD2	19p13.3	0.667041	1.25418e-23	9.9182e-21
BICRA	19q13.33	0.666446	1.41853e-23	1.0708e-20
HSF1	8q24.3	0.666219	1.48661e-23	1.0734e-20
EML3	11q12.3	0.665149	1.85268e-23	1.28198e-20
ZNF414	19p13.2	0.662105	3.45056e-23	2.29214e-20
STK11	19p13.3	0.655564	1.28107e-22	8.1826e-20
ARHGEF1	19q13.2	0.652558	2.31579e-22	1.38603e-19
ADAT3	19p13.3	0.652512	2.3369e-22	1.38603e-19
PCNX3	11q13.1	0.649976	3.8303e-22	2.19344e-19
SF3A2	19p13.3	0.648896	4.72087e-22	2.61332e-19
TMC6	17q25.3	0.645844	8.48469e-22	4.54533e-19
SBNO2	19p13.3	0.645032	9.90411e-22	5.13992e-19
BAG6	6p21.33	0.642402	1.63035e-21	8.20461e-19
TRABD	22q13.33	0.641962	1.77138e-21	8.65214e-19
CNOT3	19q13.42	0.641118	2.07575e-21	9.7265e-19
STRN4	19q13.32	0.641027	2.11125e-21	9.7265e-19
ARHGAP4	Xq28	0.640888	2.16704e-21	9.7265e-19
EPN1	19q13.42	0.640555	2.30689e-21	1.00817e-18
NCOR2	12q24.31	0.64036	2.39252e-21	1.0151e-18
BRF1	14q32.33	0.640137	2.4942e-21	1.0151e-18
PCIF1	20q13.12	0.640112	2.50612e-21	1.0151e-18
ACBD4	17q21.31	0.63934	2.89454e-21	1.14452e-18
PPP6R2	22q13.33	0.639011	3.07759e-21	1.18859e-18
CIZ1	9q34.11	0.638624	3.30742e-21	1.24832e-18
XAB2	19p13.2	0.638237	3.55404e-21	1.28364e-18
PTPN23	3p21.31	0.638235	3.55557e-21	1.28364e-18
ST6GALNAC6	9q34.11	0.638093	3.65012e-21	1.28974e-18
PRR12	19q13.33	0.636265	5.11913e-21	1.77111e-18
SCAF1	19q13.3-q13.4	0.635905	5.46936e-21	1.85367e-18
ATP13A1	19p13.11	0.635641	5.74184e-21	1.90709e-18
CRTC2	1q21.3	0.635497	5.89557e-21	1.91976e-18
PWWP2B	10q26.3	0.635358	6.04817e-21	1.93158e-18
CARM1	19p13.2	0.635015	6.44135e-21	2.01833e-18
RNF126	19p13.3	0.634705	6.81887e-21	2.09706e-18
ACBD3	1q42.12	-0.633882	7.92698e-21	2.35676e-18
ZFYVE19	15q15.1	0.633868	7.94715e-21	2.35676e-18
SIGIRR	11p15.5	0.633449	8.57979e-21	2.49973e-18
ZNF213	16p13.3	0.632967	9.36788e-21	2.68228e-18
PRICKLE3	Xp11.23	0.632598	1.00177e-20	2.81974e-18
NCDN	1p34.3	0.632394	1.03962e-20	2.87749e-18
TMEM129	4p16.3	0.631958	1.12523e-20	3.06338e-18
SCYL1	11q13.1	0.630781	1.3926e-20	3.68326e-18
PFKL	21q22.3	0.630762	1.39728e-20	3.68326e-18
CNPPD1	2q35	0.630514	1.46127e-20	3.7491e-18
FRMD8	11q13.1	0.630491	1.4674e-20	3.7491e-18
MED16	19p13.3	0.630132	1.56563e-20	3.93947e-18
DENND4B	1q21.3	0.629882	1.63786e-20	4.05969e-18
CACTIN	19p13.3	0.629339	1.80573e-20	4.3733e-18
ULK3	15q24.1	0.629305	1.81705e-20	4.3733e-18
TMEM259	19p13.3	0.629165	1.86302e-20	4.41989e-18
IRAK1	Xq28	0.628442	2.12107e-20	4.96121e-18
PI4KB	1q21.3	0.627427	2.54328e-20	5.86616e-18
SH2B1	16p11.2	0.625404	3.6448e-20	8.29167e-18
CSK	15q24.1	0.624194	4.51414e-20	1.00447e-17
MBD6	12q13.3	0.624166	4.53635e-20	1.00447e-17
CSNK1G2	19p13.3	0.623234	5.34525e-20	1.16801e-17
ZNF687	1q21.3	0.622778	5.79166e-20	1.24912e-17
C6ORF136	6p21.33	0.621295	7.50894e-20	1.59873e-17
ZSWIM8	10q22.2	0.620583	8.50086e-20	1.78701e-17
HDAC10	22q13.33	0.620022	9.37221e-20	1.94555e-17
FBXW5	9q34.3	0.618502	1.21981e-19	2.50092e-17
DNAJC4	11q13.1	0.618295	1.26408e-19	2.56006e-17
MVD	16q24.2	0.617514	1.44639e-19	2.89399e-17
PPP1R13L	19q13.32	0.616909	1.60505e-19	3.17322e-17
HGS	17q25.3	0.616312	1.77859e-19	3.47496e-17
DEF6	6p21.31	0.615975	1.88406e-19	3.63821e-17
ABHD8	19p13.11	0.615771	1.95103e-19	3.72422e-17
PPP1R12C	19q13.42	0.614644	2.36536e-19	4.44631e-17
GLI4	8q24.3	0.614601	2.38286e-19	4.44631e-17
PEX16	11p11.2	0.613695	2.78024e-19	5.13017e-17
SELENOO	22q13.33	0.613558	2.84559e-19	5.19304e-17
POLRMT	19p13.3	0.61096	4.41479e-19	7.96917e-17
C19ORF71	19p13.3	0.610816	4.52309e-19	8.01278e-17
CMTR1	6p21.2	0.6108	4.53545e-19	8.01278e-17
SCAMP4	19p13.3	0.60994	5.24002e-19	9.16011e-17
CCDC43	17q21.31	-0.609762	5.39915e-19	9.33996e-17
STK25	2q37.3	0.609129	6.00236e-19	1.02764e-16
OTUD5	Xp11.23	0.6088	6.34171e-19	1.07466e-16
CLASRP	19q13.32	0.608617	6.53856e-19	1.09683e-16
CORO7	16p13.3	0.608429	6.74661e-19	1.11103e-16
MED15	22q11.21	0.60842	6.75705e-19	1.11103e-16
GMEB2	20q13.33	0.60823	6.97458e-19	1.13556e-16
RPS6KB2	11q13.2	0.607451	7.93981e-19	1.28016e-16
BORCS8-MEF2B	19p13.11	0.607129	8.37631e-19	1.33755e-16
FAAP20	1p36.33	0.606997	8.56201e-19	1.35418e-16
GSDMD	8q24.3	0.606503	9.29178e-19	1.45574e-16
DHX34	19q13.32	0.606445	9.38193e-19	1.45613e-16
WDR24	16p13.3	0.605956	1.01728e-18	1.56425e-16
INTS11	1p36.33	0.605875	1.03101e-18	1.57082e-16
SYVN1	11q13.1	0.605527	1.09196e-18	1.64855e-16
MXD4	4p16.3	0.604892	1.21251e-18	1.81407e-16
INTS1	7p22.3	0.603805	1.44978e-18	2.14969e-16
FLYWCH1	16p13.3	0.603464	1.53309e-18	2.23843e-16
HEXD	17q25.3	0.603451	1.53659e-18	2.23843e-16
E4F1	16p13.3	0.603277	1.58098e-18	2.28308e-16
ARRDC2	19p13.11	0.602908	1.67928e-18	2.40413e-16
HDAC7	12q13.11	0.602809	1.70688e-18	2.42275e-16
CPTP	1p36.33	0.602658	1.74944e-18	2.46212e-16
TRMT61A	14q32.33	0.601828	2.00313e-18	2.79546e-16
IRF7	11p15.5	0.599944	2.7204e-18	3.73939e-16
ABHD16B	20q13.33	0.599921	2.73063e-18	3.73939e-16
ACSF3	16q24.3	0.599884	2.74707e-18	3.73939e-16
TBC1D10C	11q13.2	0.599647	2.85417e-18	3.8536e-16
SLC30A7	1p21.2	-0.599033	3.15191e-18	4.22127e-16
COQ8B	19q13.2	0.598428	3.47477e-18	4.61645e-16
BRAT1	7p22.3	0.598025	3.70777e-18	4.88689e-16
LEMD2	6p21.31	0.597916	3.77328e-18	4.93408e-16
SLC66A2	18q23	0.597821	3.83135e-18	4.94338e-16
POLR2E	19p13.3	0.597807	3.83992e-18	4.94338e-16
TRAPPC12	2p25.3	0.597397	4.1014e-18	5.23938e-16
ATXN2L	16p11.2	0.596949	4.40637e-18	5.586e-16
USP19	3p21.31	0.596509	4.72796e-18	5.94828e-16
VPS51	11q13.1	0.595939	5.17929e-18	6.42597e-16
LMF2	22q13.33	0.595932	5.18504e-18	6.42597e-16
FAM3A	Xq28	0.595332	5.70597e-18	7.01919e-16
RASGRP2	11q13.1	0.594715	6.29421e-18	7.68587e-16
ARHGAP45	19p13.3	0.593781	7.30004e-18	8.84903e-16
CYHR1	8q24.3	0.593341	7.82722e-18	9.41932e-16
FAM89B	11q13.1	0.593058	8.18517e-18	9.77922e-16
DGKQ	4p16.3	0.592917	8.3701e-18	9.89086e-16
RELA	11q13.1	0.592896	8.39773e-18	9.89086e-16
PPDPF	20q13.33	0.591811	9.96418e-18	1.16532e-15
FRS3	6p21.1	0.591183	1.09983e-17	1.27727e-15
ZBTB45	19q13.43	0.590752	1.17681e-17	1.35717e-15
GPR137	11q13.1	0.590476	1.2288e-17	1.40736e-15
AKAP8L	19p13.12	0.590207	1.28164e-17	1.45782e-15
EIF3J	15q21.1	-0.590024	1.31888e-17	1.48906e-15
OTUB1	11q13.1	0.589985	1.32704e-17	1.48906e-15
ALG12	22q13.33	0.589904	1.34398e-17	1.49795e-15
ATP13A2	1p36.13	0.589526	1.4257e-17	1.57844e-15
CYB5R3	22q13.2	0.588427	1.69195e-17	1.86081e-15
TRADD	16q22.1	0.58824	1.74207e-17	1.89157e-15
TBC1D17	19q13.33	0.588237	1.7427e-17	1.89157e-15
REXO1	19p13.3	0.587897	1.83743e-17	1.97017e-15
RING1	6p21.32	0.587866	1.84605e-17	1.97017e-15
RPUSD1	16p13.3	0.58785	1.8507e-17	1.97017e-15
MAP2K2	19p13.3	0.587799	1.86541e-17	1.97318e-15
RNF215	22q12.2	0.587407	1.98226e-17	2.08351e-15
DCAF15	19p13.12	0.586858	2.15827e-17	2.25424e-15
ACTR1B	2q11.2	0.586469	2.2922e-17	2.37916e-15
MED22	9q34.2	0.586133	2.4143e-17	2.49032e-15
RXRB	6p21.32	0.586042	2.44821e-17	2.50146e-15
TXNDC9	2q11.2	-0.586024	2.45522e-17	2.50146e-15
SHFL	19p13.2	0.58572	2.5729e-17	2.60538e-15
FERMT3	11q13.1	0.585479	2.67024e-17	2.68755e-15
NELFB	9q34.3	0.585428	2.69114e-17	2.69228e-15
ZBTB17	1p36.13	0.585342	2.72705e-17	2.71186e-15
ZNF335	20q13.12	0.585074	2.84221e-17	2.80956e-15
FKBP8	19p13.11	0.584883	2.92647e-17	2.87573e-15
POLG	15q26.1	0.584494	3.1068e-17	3.03498e-15
TMA16	4q32.2	-0.584119	3.29096e-17	3.19608e-15
THEM6	8q24.3	0.58398	3.36184e-17	3.24593e-15
CLPTM1	19q13.32	0.58382	3.44519e-17	3.29052e-15
TBC1D10A	22q12.2	0.583815	3.44764e-17	3.29052e-15
SLC10A3	Xq28	0.583437	3.65281e-17	3.46641e-15
MKNK2	19p13.3	0.583289	3.73659e-17	3.52577e-15
KMT2B	19q13.12	0.583243	3.76315e-17	3.53077e-15
FKRP	19q13.32	0.582967	3.92506e-17	3.662e-15
SH3GLB2	9q34.11	0.581991	4.55443e-17	4.22544e-15
AIP	11q13.2	0.581581	4.84756e-17	4.47241e-15
SMG5	1q22	0.581175	5.15549e-17	4.70589e-15
SREBF1	17p11.2	0.581173	5.1573e-17	4.70589e-15
CCDC157	22q12.2	0.580943	5.33994e-17	4.84592e-15
AP1G2	14q11.2	0.580443	5.76065e-17	5.1993e-15
NUDT22	11q13.1	0.580355	5.83795e-17	5.24058e-15
FBXL19	16p11.2	0.58013	6.03987e-17	5.3927e-15
C19ORF25	19p13.3	0.579942	6.21371e-17	5.51824e-15
IER3IP1	18q21.1	-0.579833	6.31681e-17	5.57996e-15
RASAL3	19p13.12	0.579676	6.46894e-17	5.68411e-15
ZNF296	19q13.32	0.579558	6.58505e-17	5.75568e-15
GSK3A	19q13.2	0.579416	6.72735e-17	5.84927e-15
HDAC5	17q21.31	0.578874	7.30021e-17	6.3143e-15
PRR7	5q35.3	0.578742	7.44682e-17	6.40774e-15
FZR1	19p13.3	0.577889	8.46504e-17	7.24634e-15
CD37	19q13.33	0.577787	8.59554e-17	7.31087e-15
SH3BP1	22q13.1	0.577761	8.62847e-17	7.31087e-15
MAPK8IP3	16p13.3	0.577689	8.72194e-17	7.35255e-15
TNK2	3q29	0.577638	8.78887e-17	7.37155e-15
MUTYH	1p34.1	0.577061	9.58229e-17	7.99664e-15
CCAR2	8p21.3	0.576857	9.87911e-17	8.20312e-15
WIZ	19p13.12	0.576336	1.06795e-16	8.82357e-15
MFNG	22q13.1	0.576123	1.10247e-16	9.06369e-15
C8ORF82	8q24.3	0.575483	1.2127e-16	9.92084e-15
RGL2	6p21.32	0.575416	1.22489e-16	9.97144e-15
UBXN6	19p13	0.575103	1.28323e-16	1.03954e-14
SPAST	2p22.3	-0.573849	1.54549e-16	1.24587e-14
SBF1	22q13.33	0.573816	1.55292e-16	1.24587e-14
SYMPK	19q13.32	0.573425	1.64553e-16	1.31381e-14
ARAF	Xp11.3	0.573237	1.69181e-16	1.3443e-14
HNRNPA3P1	10q11.21	-0.572968	1.7603e-16	1.39021e-14
MED25	19q13.33	0.572945	1.76633e-16	1.39021e-14
C11ORF68	11q13.1	0.572736	1.82151e-16	1.42688e-14
SRF	6p21.1	0.572481	1.89125e-16	1.47253e-14
D2HGDH	2q37.3	0.572451	1.89967e-16	1.47253e-14
MAP1S	19p13.12	0.572427	1.90639e-16	1.47253e-14
BAP1	3p21.1	0.572007	2.02815e-16	1.55933e-14
PCED1A	20p13	0.571786	2.09498e-16	1.60329e-14
DGAT1	8q24.3	0.571595	2.15456e-16	1.64132e-14
FPGS	9q34.11	0.57135	2.23341e-16	1.69362e-14
MIB2	1p36.33	0.571253	2.26554e-16	1.71017e-14
RGS14	5q35.3	0.571184	2.28876e-16	1.71989e-14
TSNARE1	8q24.3	0.571137	2.30438e-16	1.72382e-14
UNC45A	15q26.1	0.571063	2.32957e-16	1.73485e-14
PUSL1	1p36.33	0.570998	2.35184e-16	1.74361e-14
CCDC97	19q13.2	0.570866	2.39781e-16	1.7698e-14
MAU2	19p13.11	0.570743	2.44134e-16	1.79395e-14
ALDH16A1	19q13.33	0.570644	2.47723e-16	1.8123e-14
TELO2	16p13.3	0.570447	2.54969e-16	1.85713e-14
SMIM29	6p21.31	0.570214	2.6379e-16	1.913e-14
MAF1	8q24.3	0.569981	2.72923e-16	1.97063e-14
MFSD13A	10q24.32	0.569872	2.77313e-16	1.99365e-14
NUMA1	11q13.4	0.56958	2.89387e-16	2.07149e-14
RHOT2	16p13.3	0.569188	3.06391e-16	2.18379e-14
PCSK7	11q23.3	0.569135	3.08779e-16	2.19141e-14
FAM53B	10q26.13	0.568854	3.21647e-16	2.27302e-14
ZDHHC8	22q11.21	0.568467	3.40269e-16	2.38674e-14
SETD1A	16p11.2	0.56846	3.40613e-16	2.38674e-14
SPCS3	4q34.2	-0.568289	3.49206e-16	2.43667e-14
MAP3K10	19q13.2	0.56802	3.63105e-16	2.52305e-14
SP2	17q21.32	0.567362	3.99452e-16	2.75627e-14
DNPEP	2q35	0.567352	3.99988e-16	2.75627e-14
FBXL15	10q24.32	0.567139	4.12524e-16	2.8309e-14
R3HDM4	19p13.3	0.56707	4.16674e-16	2.84762e-14
TUBGCP2	10q26.3	0.566884	4.28016e-16	2.91314e-14
FBRS	16p11.2	0.566611	4.45267e-16	3.01818e-14
ZGPAT	20q13.33	0.566439	4.5643e-16	3.08127e-14
PRMT7	16q22.1	0.565892	4.93886e-16	3.32064e-14
PRKD2	19q13.32	0.564782	5.79369e-16	3.87967e-14
MGRN1	16p13.3	0.564548	5.99157e-16	3.99607e-14
AXIN1	16p13.3	0.564214	6.28515e-16	4.1751e-14
GRK6	5q35.3	0.564068	6.41797e-16	4.24634e-14
EIF3A	10q26.11	-0.563829	6.64103e-16	4.36643e-14
GDI2	10p15.1	-0.563818	6.65205e-16	4.36643e-14
RAD9A	11q13.2	0.563788	6.68079e-16	4.36802e-14
UCK1	9q34.13	0.562895	7.58888e-16	4.92462e-14
SGTA	19p13.3	0.562893	7.59139e-16	4.92462e-14
SFR1	10q25.1	-0.56259	7.92714e-16	5.12241e-14
SH3GL1	19p13.3	0.562545	7.97703e-16	5.13467e-14
PIP5K1C	19p13.3	0.562423	8.11781e-16	5.20511e-14
PPP2R1A	19q13.41	0.561863	8.7902e-16	5.61457e-14
NUBP2	16p13.3	0.561711	8.98227e-16	5.71527e-14
ZNF384	12p13.31	0.56067	1.04105e-15	6.59876e-14
RAB11B	19p13.2	0.560498	1.06675e-15	6.73596e-14
NPRL3	16p13.3	0.560147	1.1211e-15	7.03032e-14
DNAJB2	2q35	0.560142	1.12184e-15	7.03032e-14
FAM207A	21q22.3	0.559843	1.17022e-15	7.30596e-14
FAM189B	1q22	0.559794	1.17829e-15	7.32877e-14
ZNF598	16p13.3	0.559743	1.1868e-15	7.35416e-14
RHBDD3	22q12.2	0.55938	1.24929e-15	7.71262e-14
GTPBP2	6p21.1	0.559187	1.28355e-15	7.89481e-14
SGSM3	22q13.1	0.559115	1.29667e-15	7.92912e-14
CCDC130	19p13.13	0.559085	1.30218e-15	7.92912e-14
URM1	9q34.11	0.559078	1.30346e-15	7.92912e-14
DENND6B	22q13.33	0.558863	1.34361e-15	8.14352e-14
MAP4K2	11q13.1	0.558682	1.37821e-15	8.32287e-14
SCAMP1	5q14.1	-0.558589	1.39629e-15	8.40151e-14
PUF60	8q24.3	0.558492	1.41552e-15	8.48649e-14
MUS81	11q13	0.558158	1.48345e-15	8.86176e-14
VPS4A	16q23.1	0.557956	1.52602e-15	9.08339e-14
TCAIM	3p21.31	-0.557875	1.54348e-15	9.15451e-14
BCL3	19q13.32	0.557542	1.6174e-15	9.55876e-14
DHX16	6p21.33	0.55727	1.67999e-15	9.89345e-14
C19ORF47	19q13.2	0.557015	1.74098e-15	1.01937e-13
AKT1S1	19q13.33	0.557006	1.74324e-15	1.01937e-13
MAP7D1	1p34.3	0.556885	1.77307e-15	1.03317e-13
TECPR1	7q21.3	0.556283	1.92848e-15	1.1198e-13
ACD	16q22.1	0.555903	2.03342e-15	1.17662e-13
FDX2	19p13.2	0.555808	2.06051e-15	1.18816e-13
FHIP2B	8p21.3	0.55566	2.10351e-15	1.20875e-13
AP3D1	19p13.3	0.554962	2.31776e-15	1.32728e-13
GRINA	8q24.3	0.554867	2.34854e-15	1.34e-13
CPSF1	8q24.3	0.554844	2.35611e-15	1.34e-13
RFX1	19p13.12	0.554744	2.38893e-15	1.35403e-13
ST6GALNAC4	9q34.11	0.553889	2.6895e-15	1.5192e-13
ZNF628	19q13.42	0.553761	2.73735e-15	1.54099e-13
SKIV2L	6p21.33	0.553462	2.85287e-15	1.60059e-13
PICK1	22q13.1	0.553136	2.98457e-15	1.66885e-13
OSBPL7	17q21.32	0.553092	3.00277e-15	1.67339e-13
E2F4	16q22.1	0.552973	3.05214e-15	1.69521e-13
ZCCHC9	5q14.1	-0.552857	3.10132e-15	1.71327e-13
VPS28	8q24.3	0.552848	3.10529e-15	1.71327e-13
PLA2G6	22q13.1	0.552732	3.1553e-15	1.73269e-13
ANAPC2	9q34.3	0.552718	3.16135e-15	1.73269e-13
GNAQ	9q21.2	-0.552593	3.21635e-15	1.75704e-13
CC2D1A	19p13.12	0.551919	3.52918e-15	1.92161e-13
CEP131	17q25.3	0.551849	3.56307e-15	1.93372e-13
HPCAL1	2p25.1	0.551124	3.93615e-15	2.12924e-13
NDUFV1	11q13.2	0.551017	3.9941e-15	2.1466e-13
ZNF787	19q13.43	0.551017	3.9941e-15	2.1466e-13
GPAA1	8q24.3	0.55085	4.08648e-15	2.18917e-13
ZMPSTE24	1p34.2	-0.550677	4.18492e-15	2.23469e-13
FAM98C	19q13.2	0.550593	4.23299e-15	2.25312e-13
F8A1	Xq28	0.550201	4.46595e-15	2.36952e-13
AK1	9q34.11	0.550148	4.4986e-15	2.37924e-13
LRRC14	8q24.3	0.550053	4.55739e-15	2.40269e-13
TBL3	16p13.3	0.549912	4.64625e-15	2.44178e-13
PACS1	11q13.1-q13.2	0.549652	4.81382e-15	2.52187e-13
EDC4	16q22.1	0.549302	5.04911e-15	2.6361e-13
NDUFS7	19p13.3	0.549265	5.07469e-15	2.6361e-13
BCKDHA	19q13.2	0.549258	5.0795e-15	2.6361e-13
LZTR1	22q11.21	0.548961	5.28892e-15	2.73624e-13
ATP5F1D	19p13.3	0.548917	5.32072e-15	2.74414e-13
TSEN34	19q13.42	0.548848	5.3713e-15	2.76165e-13
TBC1D25	Xp11.23	0.548825	5.38804e-15	2.7617e-13
PDLIM2	8p21.3	0.548412	5.69915e-15	2.90907e-13
NR1H2	19q13.3	0.548397	5.71058e-15	2.90907e-13
TMEM175	4p16.3	0.548282	5.80052e-15	2.94585e-13
ADSS2	1q44	-0.548111	5.93718e-15	3.00606e-13
SMS	Xp22.11	-0.547946	6.07125e-15	3.0646e-13
NOSIP	19q13.33	0.547782	6.20827e-15	3.12427e-13
TSC2	16p13.3	0.547659	6.31252e-15	3.15858e-13
PTGES2	9q34.11	0.547657	6.3145e-15	3.15858e-13
SIRT2	19q13.2	0.547606	6.35801e-15	3.17079e-13
DUS3L	19p13.3	0.547086	6.82129e-15	3.39165e-13
CAPN15	16p13.3	0.546982	6.91819e-15	3.42957e-13
SLC52A2	8q24.3	0.546713	7.17423e-15	3.5459e-13
SCRIB	8q24.3	0.546484	7.40003e-15	3.64665e-13
ARFRP1	20q13.33	0.546254	7.63275e-15	3.75021e-13
SLC39A13	11p11.2	0.545629	8.30435e-15	4.06815e-13
SUGP1	19p13.11	0.545496	8.45332e-15	4.12455e-13
CDK10	16q24.3	0.545483	8.46916e-15	4.12455e-13
SNX4	3q21.2	-0.545309	8.66952e-15	4.20979e-13
SCAMP3	1q22	0.544982	9.0588e-15	4.38599e-13
DOT1L	19p13.3	0.544933	9.11822e-15	4.40193e-13
ZNF444	19q13.43	0.544854	9.21522e-15	4.43586e-13
TPGS1	19p13.3	0.544442	9.73974e-15	4.67479e-13
KCNAB2	1p36.31	0.543774	1.06507e-14	5.09727e-13
KLHL36	16q24.1	0.543478	1.10817e-14	5.28832e-13
NDUFS8	11q13.2	0.543288	1.13667e-14	5.4088e-13
TMEM222	1p36.11	0.542518	1.25956e-14	5.97641e-13
ATG4D	19p13.2	0.542423	1.2756e-14	6.03531e-13
GPN2	1p36.11	0.54194	1.36028e-14	6.41767e-13
BLOC1S6	15q21.1	-0.541577	1.42752e-14	6.71583e-13
ERCC1	19q13.32	0.541406	1.46041e-14	6.83182e-13
MTG2	20q13.33	0.541406	1.46041e-14	6.83182e-13
VPS4B	18q21.33	-0.541193	1.50232e-14	7.00815e-13
CRTC1	19p13.11	0.541167	1.50741e-14	7.0122e-13
MTCH1	6p21.2	0.541079	1.52512e-14	7.07477e-13
QTRT1	19p13.3	0.540305	1.68977e-14	7.81672e-13
ZNRD2	11q13.1	0.539899	1.78283e-14	8.22431e-13
SPSB3	16p13.3	0.539839	1.79708e-14	8.26707e-13
PRRG2	19q13.33	0.538982	2.01214e-14	9.23083e-13
ATXN7L3	17q21.31	0.538363	2.18292e-14	9.9867e-13
LARP7	4q25	-0.537957	2.30235e-14	1.05042e-12
UCKL1	20q13.33	0.537681	2.38718e-14	1.08613e-12
RPS6KB1	17q23.1	-0.537303	2.50833e-14	1.1347e-12
ZNF579	19q13.42	0.537294	2.51138e-14	1.1347e-12
MFSD3	8q24.3	0.537285	2.51443e-14	1.1347e-12
RHOF	12q24.31	0.537201	2.54205e-14	1.14406e-12
KLF16	19p13.3	0.537048	2.59346e-14	1.16404e-12
PKD1	16p13.3	0.536814	2.67409e-14	1.197e-12
AMDHD2	16p13.3	0.536209	2.89396e-14	1.29193e-12
CDC37	19p13.2	0.535992	2.97738e-14	1.32361e-12
LYPLA2	1p36.11	0.535983	2.98086e-14	1.32361e-12
RFNG	17q25.3	0.535642	3.11632e-14	1.38007e-12
MEN1	11q13	0.535621	3.12479e-14	1.38014e-12
HECTD3	1p34.1	0.535303	3.25665e-14	1.43457e-12
ATAD3B	1p36.33	0.535139	3.32711e-14	1.46173e-12
ANP32E	1q21.2	-0.535024	3.37696e-14	1.47972e-12
TYK2	19p13.2	0.534893	3.43506e-14	1.50121e-12
TRMT2A	22q11.21	0.534833	3.46206e-14	1.50904e-12
MLANA	9p24.1	-0.534712	3.51667e-14	1.52883e-12
SMC5	9q21.12	-0.534559	3.5872e-14	1.55542e-12
RNPEPL1	2q37.3	0.534388	3.66792e-14	1.58628e-12
PHRF1	11p15.5	0.53427	3.72458e-14	1.6066e-12
ASPSCR1	17q25.3	0.533908	3.90323e-14	1.6793e-12
MOB4	2q33.1	-0.53376	3.97892e-14	1.70744e-12
MED24	17q21.1	0.533153	4.30377e-14	1.84208e-12
CCDC91	12p11.22	-0.532904	4.44399e-14	1.89721e-12
UGP2	2p15	-0.53264	4.5981e-14	1.95471e-12
DHX38	16q22.2	0.532633	4.60222e-14	1.95471e-12
UBE2K	4p14	-0.532424	4.72818e-14	2.00308e-12
UBA7	3p21.31	0.532376	4.7574e-14	2.01034e-12
DDX54	12q24.13	0.532245	4.83815e-14	2.0357e-12
RAB5A	3p24.3	-0.532239	4.84195e-14	2.0357e-12
SIRT6	19p13.3	0.532211	4.85932e-14	2.03785e-12
FAU	11q13.1	0.531871	5.07715e-14	2.12384e-12
PTGES3	12q13.3	-0.531778	5.13805e-14	2.14391e-12
ATG4B	2q37.3	0.531516	5.31397e-14	2.21176e-12
RALGDS	9q34.13-q34.2	0.53143	5.37284e-14	2.23067e-12
ATF6B	6p21.3	0.531384	5.40492e-14	2.23839e-12
LLGL1	17p11.2	0.531352	5.42749e-14	2.24215e-12
PIDD1	11p15.5	0.531113	5.59639e-14	2.30618e-12
THUMPD1	16p12.3	-0.531053	5.63982e-14	2.31833e-12
UPF1	19p13.11	0.530971	5.69881e-14	2.33679e-12
CEP63	3q22.2	-0.530754	5.86024e-14	2.39707e-12
IKBIP	12q23.1	-0.530598	5.97801e-14	2.43923e-12
ENTPD6	20p11.21	0.530529	6.03148e-14	2.45502e-12
FBXL8	16q22.1	0.530334	6.18371e-14	2.51083e-12
DVL2	17p13.1	0.530269	6.23528e-14	2.52559e-12
WDR18	19p13.3	0.529808	6.61405e-14	2.67233e-12
GDI1	Xq28	0.529789	6.62974e-14	2.67233e-12
RABEP2	16p11.2	0.529609	6.7846e-14	2.72813e-12
TAPBPL	12p13.31	0.52949	6.88775e-14	2.76292e-12
MIER1	1p31.3	-0.529428	6.94298e-14	2.77836e-12
B3GAT3	11q12.3	0.529379	6.98623e-14	2.78895e-12
UQCC3	11q12.3	0.529134	7.20859e-14	2.87082e-12
KRI1	19p13.2	0.529113	7.22778e-14	2.87157e-12
IDUA	4p16.3	0.529076	7.26203e-14	2.87829e-12
FBXL6	8q24.3	0.528773	7.54702e-14	2.98413e-12
B9D2	19q13.2	0.528603	7.71276e-14	3.04242e-12
IRF3	19q13.33	0.528447	7.86666e-14	3.08936e-12
ZNF777	7q36.1	0.52841	7.90385e-14	3.08936e-12
CTU1	19q13.41	0.528408	7.90618e-14	3.08936e-12
MAP3K14	17q21.31	0.528408	7.90618e-14	3.08936e-12
GTPBP6	Xp22.33 and Yp11.32	0.528288	8.02827e-14	3.12971e-12
PIK3CB	3q22.3	-0.528053	8.27068e-14	3.21387e-12
SND1-IT1	7q32.1	-0.528042	8.28287e-14	3.21387e-12
TPRA1	3q21.3	0.52794	8.39084e-14	3.24818e-12
AGPAT1	6p21.32	0.527863	8.47364e-14	3.2726e-12
PEX14	1p36.22	0.527541	8.82624e-14	3.40087e-12
LCN12	9q34.3	0.527436	8.9451e-14	3.43869e-12
IRF2BPL	14q24.3	0.527416	8.96742e-14	3.43931e-12
DHX30	3p21.31	0.527347	9.0468e-14	3.45888e-12
ARHGAP9	12q13.3	0.527335	9.0601e-14	3.45888e-12
ERF	19q13.2	0.527272	9.13223e-14	3.47842e-12
USO1	4q21.1	-0.527235	9.17524e-14	3.4868e-12
RABL3	3q13.33	-0.527194	9.2235e-14	3.49443e-12
U2AF2	19q13.42	0.527182	9.23741e-14	3.49443e-12
MCRS1	12q13.12	0.527036	9.40981e-14	3.55156e-12
EML2	19q13.32	0.526807	9.68707e-14	3.64792e-12
SAMD1	19p13.12	0.526681	9.84164e-14	3.69774e-12
EME2	16p13.3	0.526598	9.94602e-14	3.72852e-12
ABHD16A	6p21.33	0.526132	1.05489e-13	3.94563e-12
MAP4K1	19q13.2	0.525842	1.09417e-13	4.08333e-12
SUMO2	17q25	-0.5253	1.17155e-13	4.36232e-12
NR1D1	17q21.1	0.525224	1.18288e-13	4.39466e-12
RWDD4	4q35.1	-0.525173	1.1905e-13	4.41308e-12
TAB1	22q13.1	0.525098	1.20166e-13	4.44454e-12
CDK9	9q34.11	0.524862	1.23792e-13	4.56848e-12
TUBGCP6	22q13.33	0.524816	1.24516e-13	4.58499e-12
RABAC1	19q13.2	0.524795	1.24842e-13	4.58685e-12
AKT2	19q13.2	0.524646	1.27191e-13	4.66283e-12
PSMB10	16q22.1	0.52434	1.32172e-13	4.83475e-12
MIS18BP1	14q21.2	-0.524299	1.32865e-13	4.84944e-12
ZNF707	8q24.3	0.524273	1.33291e-13	4.85431e-12
TAOK2	16p11.2	0.524255	1.33602e-13	4.85497e-12
CANX	5q35.3	-0.524232	1.33991e-13	4.85848e-12
ABCA7	19p13.3	0.524099	1.36229e-13	4.9196e-12
TGFB1	19q13.2	0.524097	1.36269e-13	4.9196e-12
NACC1	19p13.13	0.523914	1.39433e-13	5.0229e-12
HELZ2	20q13.33	0.523838	1.40775e-13	5.0603e-12
CYB5B	16q22.1	-0.523598	1.45063e-13	5.20316e-12
GATD1	11p15.5	0.523353	1.49576e-13	5.35347e-12
CARD19	9q22.31	0.522602	1.64288e-13	5.86739e-12
TAPBP	6p21.32	0.522475	1.66922e-13	5.94865e-12
TOP3B	22q11.22	0.522333	1.69891e-13	6.04149e-12
ELMO3	16q22.1	0.522301	1.70579e-13	6.05302e-12
RNF44	5q35.2	0.522164	1.73511e-13	6.14393e-12
IGSF8	1q23.2	0.52196	1.77976e-13	6.28861e-12
CYBC1	17q25.3	0.521879	1.79783e-13	6.331e-12
TNIP2	4p16.3	0.521872	1.79938e-13	6.331e-12
SLC25A45	11q13.1	0.521844	1.80562e-13	6.33953e-12
HPS1	10q24.2	0.521798	1.81607e-13	6.36276e-12
WBP2	17q25.1	0.521724	1.83291e-13	6.40823e-12
NDOR1	9q34.3	0.521654	1.84883e-13	6.45032e-12
KIFC2	8q24.3	0.521397	1.90893e-13	6.64603e-12
SH2D3C	9q34.11	0.521358	1.9183e-13	6.65077e-12
FCSK	16q22.1	0.521358	1.9183e-13	6.65077e-12
DDX46	5q31.1	-0.521307	1.93049e-13	6.67211e-12
TRAF2	9q34.3	0.521274	1.93829e-13	6.67211e-12
RPS19BP1	22q13.1	0.521272	1.93885e-13	6.67211e-12
UGDH	4p14	-0.521265	1.94052e-13	6.67211e-12
CROCC	1p36.13	0.521219	1.95173e-13	6.69678e-12
ILVBL	19p13.12	0.521133	1.97263e-13	6.75453e-12
SLAIN2	4p11	-0.520838	2.04603e-13	6.99145e-12
RPL28	19q13.42	0.520618	2.10267e-13	7.17024e-12
SRP9	1q42.12	-0.520535	2.12453e-13	7.21515e-12
TEPSIN	17q25.3	0.520535	2.12453e-13	7.21515e-12
MYO9B	19p13.11	0.520431	2.15217e-13	7.29409e-12
MPHOSPH10	2p13.3	-0.520393	2.16208e-13	7.31275e-12
DCAF13P3	15q21.2	-0.520308	2.18516e-13	7.37582e-12
HSD17B11	4q22.1	-0.520261	2.19774e-13	7.40323e-12
CWC27	5q12.3	-0.52006	2.25329e-13	7.57498e-12
PRRC1	5q23.2	-0.520025	2.263e-13	7.59227e-12
EIF4E	4q23	-0.519791	2.32948e-13	7.77936e-12
AGAP2	12q14.1	0.519786	2.33082e-13	7.77936e-12
RANBP3	19p13.3	0.519779	2.33282e-13	7.77936e-12
TNFAIP8	5q23.1	-0.519278	2.48191e-13	8.25993e-12
ATXN3	14q32.12	-0.519242	2.49303e-13	8.28035e-12
PANK4	1p36.32	0.519052	2.55218e-13	8.45988e-12
BTF3L4	1p32.3	-0.519035	2.55729e-13	8.45994e-12
TMEM134	11q13.2	0.518491	2.73481e-13	9.02922e-12
PHF1	6p21.32	0.518384	2.77094e-13	9.13034e-12
RIPOR1	16q22.1	0.518354	2.78123e-13	9.14611e-12
GUK1	1q42.13	0.518277	2.80753e-13	9.21434e-12
SPHK2	19q13.33	0.518215	2.82922e-13	9.26723e-12
SCAP	3p21.31	0.518145	2.85352e-13	9.32842e-12
UBA1	Xp11.3	0.518048	2.88788e-13	9.4222e-12
GOLGA4	3p22.2	-0.517974	2.91432e-13	9.48984e-12
ACAP3	1p36.33	0.517851	2.95865e-13	9.61532e-12
GGA1	22q13.1	0.517786	2.98233e-13	9.67335e-12
REX1BD	19p13.11	0.517747	2.9968e-13	9.70132e-12
SNRNP70	19q13.33	0.517693	3.01648e-13	9.74604e-12
ERGIC2	12p11.22	-0.517526	3.07891e-13	9.92843e-12
TBC1D22A	22q13.31	0.517311	3.16141e-13	1.01747e-11
ROM1	11q12.3	0.516891	3.3282e-13	1.06908e-11
ZNF277	7q31.1	-0.516683	3.41416e-13	1.09457e-11
PRPF31	19q13.42	0.516604	3.44737e-13	1.10309e-11
LKAAEAR1	20q13.33	0.516388	3.53984e-13	1.1305e-11
INO80E	16p11.2	0.516324	3.56766e-13	1.13502e-11
DNM2	19p13.2	0.516324	3.56766e-13	1.13502e-11
PPP1R16A	8q24.3	0.516303	3.57677e-13	1.13574e-11
ZNF524	19q13.42	0.516256	3.59709e-13	1.14002e-11
PRPF40A	2q23.3	-0.516108	3.66288e-13	1.1569e-11
SUGT1	13q14.3	-0.516105	3.6643e-13	1.1569e-11
SUMO1	2q33.1	-0.516027	3.69935e-13	1.16575e-11
PIN1	19p13	0.515955	3.73195e-13	1.1738e-11
RBM10	Xp11.3	0.515881	3.76589e-13	1.18223e-11
CHMP1A	16q24.3	0.515749	3.8271e-13	1.19918e-11
RBM42	19q13.12	0.515438	3.97483e-13	1.24313e-11
AJM1	9q34.3	0.515422	3.9827e-13	1.24325e-11
TJAP1	6p21.1	0.515267	4.05878e-13	1.26462e-11
PYCR2	1q42.12	0.515086	4.14913e-13	1.29035e-11
SMC6	2p24.2	-0.515023	4.18086e-13	1.29779e-11
STARD3	17q11-q12	0.514979	4.20333e-13	1.30233e-11
PNKP	19q13.33	0.514831	4.27988e-13	1.32358e-11
PLAA	9p21.2	-0.51456	4.42336e-13	1.36518e-11
STK10	5q35.1	0.514546	4.43084e-13	1.36518e-11
ATP13A3	3q29	-0.514467	4.47347e-13	1.37576e-11
PTPA	9q34.11	0.51419	4.62634e-13	1.42014e-11
IRF2BP1	19q13.32	0.514089	4.68347e-13	1.43503e-11
UBE2V2	8q11.21	-0.514041	4.71121e-13	1.44087e-11
CAPS	19p13.3	0.513867	4.81161e-13	1.46887e-11
MICALL1	22q13.1	0.513473	5.04693e-13	1.53788e-11
TRIM33	1p13.2	-0.513436	5.06965e-13	1.54197e-11
PIM3	22q13.33	0.513174	5.23294e-13	1.58755e-11
NUDT8	11q13.2	0.513165	5.23862e-13	1.58755e-11
C1D	2p14	-0.512842	5.44693e-13	1.64767e-11
TESK1	9p13.3	0.512363	5.77185e-13	1.74278e-11
CCDC102A	16q21	0.512237	5.85966e-13	1.76609e-11
SCRN2	17q21.32	0.511969	6.05272e-13	1.82097e-11
RNF123	3p21.31	0.511894	6.10706e-13	1.834e-11
UFL1	6q16.1	-0.511653	6.28695e-13	1.88461e-11
DNLZ	9q34.3	0.511336	6.53182e-13	1.95448e-11
SLC4A2	7q36.1	0.511227	6.61794e-13	1.97669e-11
PSD4	2q14.1	0.510787	6.97749e-13	2.07983e-11
PRSS53	16p11.2	0.510761	6.99888e-13	2.07983e-11
LONP1	19p13.2	0.510759	7.00083e-13	2.07983e-11
YPEL3	16p11.2	0.510652	7.09099e-13	2.10286e-11
ARMC6	19p13.11	0.51036	7.34377e-13	2.17394e-11
DUS1L	17q25.3	0.510152	7.52967e-13	2.225e-11
TSNAX	1q42.2	-0.51011	7.5674e-13	2.23218e-11
DOHH	19p13.3	0.509836	7.81931e-13	2.3024e-11
WDR97	8q24.3	0.509442	8.19662e-13	2.40923e-11
PYGO2	1q21.3	0.509401	8.23759e-13	2.41699e-11
PNPLA6	19p13.2	0.509268	8.36866e-13	2.45112e-11
USP21	1q23.3	0.509224	8.4128e-13	2.45971e-11
CDIPT	16p11.2	0.509187	8.45014e-13	2.46628e-11
NELFA	4p16.3	0.509037	8.60352e-13	2.50664e-11
ARID4A	14q23.1	-0.508972	8.67042e-13	2.52171e-11
NSL1	1q32.3	-0.508499	9.17334e-13	2.66332e-11
AAMP	2q35	0.508443	9.23435e-13	2.67635e-11
VAV1	19p13.3	0.508165	9.54532e-13	2.76166e-11
TSSC4	11p15.5	0.508105	9.61403e-13	2.7767e-11
BCL9L	11q23.3	0.508056	9.66987e-13	2.78798e-11
CYC1	8q24.3	0.507924	9.82305e-13	2.82723e-11
CTBP1	4p16.3	0.507769	1.00058e-12	2.87484e-11
UBE2W	8q21.11	-0.507581	1.02319e-12	2.93473e-11
BZW1	2q33.1	-0.507563	1.02544e-12	2.93613e-11
HMG20B	19p13.3	0.507456	1.03851e-12	2.96843e-11
TICAM1	19p13.3	0.507324	1.05493e-12	3.01018e-11
HDGFL2	19p13.3	0.506893	1.11028e-12	3.16268e-11
AP5Z1	7p22.1	0.506877	1.11242e-12	3.16334e-11
BAIAP2L2	22q13.1	0.50686	1.11467e-12	3.16434e-11
PAXX	9q34.3	0.50677	1.12656e-12	3.19263e-11
SLMAP	3p14.3	-0.506647	1.14308e-12	3.23392e-11
KLC4	6p21.1	0.506571	1.15348e-12	3.25226e-11
GRK2	11q13.2	0.506571	1.15348e-12	3.25226e-11
FCF1	14q24.3	-0.506538	1.15792e-12	3.25925e-11
NUS1	6q22.1	-0.506448	1.17038e-12	3.28874e-11
KIAA2013	1p36.22	0.506242	1.1993e-12	3.36431e-11
ESCO1	18q11.2	-0.506198	1.20556e-12	3.37617e-11
RABGGTA	14q12	0.505991	1.23532e-12	3.4537e-11
CDC34	19p13.3	0.505938	1.24313e-12	3.46969e-11
MYL5	4p16.3	0.505804	1.26303e-12	3.51932e-11
DRD4	11p15.5	0.505728	1.27427e-12	3.54326e-11
CLCN7	16p13.3	0.505718	1.27589e-12	3.54326e-11
TMED7	5q22.3	-0.505337	1.33456e-12	3.70001e-11
HGH1	8q24.3	0.505182	1.35908e-12	3.76172e-11
PRRC2A	6p21.33	0.505157	1.36317e-12	3.76676e-11
SFI1	22q12.2	0.50506	1.3789e-12	3.8007e-11
MAP2K7	19p13.2	0.505053	1.38003e-12	3.8007e-11
NACA2	17q23.2	-0.50502	1.38532e-12	3.80894e-11
AUP1	2p13.1	0.504985	1.39101e-12	3.81825e-11
CENPQ	6p12.3	-0.504851	1.41321e-12	3.87279e-11
GTPBP1	22q13.1	0.504707	1.43732e-12	3.93237e-11
KAT8	16p11.2	0.504615	1.45308e-12	3.96246e-11
DHX58	17q21.2	0.504615	1.45308e-12	3.96246e-11
ASCC2	22q12.2	0.504554	1.46342e-12	3.98411e-11
ADCK5	8q24.3	0.504405	1.48933e-12	4.048e-11
IKBKG	Xq28	0.504253	1.5162e-12	4.1143e-11
YIPF2	19p13.2	0.504237	1.51909e-12	4.11432e-11
ARF4	3p14.3	-0.504225	1.52116e-12	4.11432e-11
SART1	11q13.1	0.503685	1.62074e-12	4.37652e-11
MRPL38	17q25.1	0.50363	1.63135e-12	4.39802e-11
MON1A	3p21.31	0.503574	1.64202e-12	4.41963e-11
RENBP	Xq28	0.503516	1.65322e-12	4.44256e-11
DAPK3	19p13.3	0.503393	1.6772e-12	4.49734e-11
MIGA2	9q34.11	0.503384	1.67902e-12	4.49734e-11
C4ORF46	4q32.1	-0.503078	1.74028e-12	4.65149e-11
GAK	4p16.3	0.503069	1.74217e-12	4.65149e-11
PRR22	19p13.3	0.502946	1.7674e-12	4.70756e-11
RAD23A	19p13.13	0.502939	1.76884e-12	4.70756e-11
PORCN	Xp11.23	0.502835	1.79056e-12	4.75773e-11
ZNF668	16p11.2	0.502733	1.81205e-12	4.80713e-11
SPOUT1	9q34.11	0.502614	1.83726e-12	4.86626e-11
ZC3H7B	22q13.2	0.5026	1.84025e-12	4.86641e-11
MADD	11p11.2	0.502584	1.84375e-12	4.8679e-11
NDUFA5	7q31.32	-0.502466	1.86939e-12	4.92778e-11
FCHO1	19p13.11	0.502438	1.87548e-12	4.92951e-11
INPP5E	9q34.3	0.502436	1.87599e-12	4.92951e-11
AMPD2	1p13.3	0.502341	1.89693e-12	4.97666e-11
WBP1	2p13.1	0.502014	1.97069e-12	5.16203e-11
VBP1	Xq28	-0.501882	2.0013e-12	5.23394e-11
BAD	11q13.1	0.501868	2.00454e-12	5.23419e-11
FHOD1	16q22.1	0.501738	2.03511e-12	5.30566e-11
XRCC3	14q32.33	0.50171	2.04172e-12	5.31455e-11
H2AZ2	7p13	-0.501629	2.06111e-12	5.35663e-11
DPH1	17p13.3	0.501495	2.09365e-12	5.43268e-11
DCTN1	2p13.1	0.501323	2.13588e-12	5.53363e-11
ZBTB48	1p36.31	0.501275	2.14802e-12	5.5564e-11
AEBP2	12p12.3	-0.501191	2.16897e-12	5.60189e-11
GRAMD1A	19q13.11	0.50114	2.18188e-12	5.62648e-11
JADE1	4q28.2	-0.501092	2.19427e-12	5.64965e-11
USF1	1q23.3	0.501068	2.20019e-12	5.65613e-11
ALKBH6	19q13.12	0.500811	2.267e-12	5.81887e-11
EDEM3	1q25.3	-0.500621	2.31762e-12	5.9396e-11
ASB6	9q34.11	0.500389	2.38083e-12	6.09221e-11
RIC8A	11p15.5	0.50035	2.39174e-12	6.11071e-11
KPNA3	13q14.2	-0.500051	2.47614e-12	6.31033e-11
RCE1	11q13.2	0.500046	2.47747e-12	6.31033e-11
LIME1	20q13.33	0.499852	2.534e-12	6.44444e-11
IDH3G	Xq28	0.499219	2.72654e-12	6.92349e-11
BDP1	5q13.2	-0.499064	2.77592e-12	7.02928e-11
OSTC	4q25	-0.499061	2.77667e-12	7.02928e-11
TRAPPC13	5q12.3	-0.499031	2.78635e-12	7.04306e-11
MED29	19q13.2	0.498834	2.85049e-12	7.19423e-11
SDR39U1	14q12	0.498748	2.87885e-12	7.25479e-11
SDHA	5p15.33	0.498732	2.88425e-12	7.25737e-11
GFER	16p13.3	0.498697	2.89584e-12	7.27553e-11
SEPTIN9	17q25.3	0.498644	2.91371e-12	7.30938e-11
TMEM115	3p21.31	0.498626	2.91996e-12	7.31398e-11
PSMD3	17q21.1	0.498294	3.03363e-12	7.58728e-11
TCEA2	20q13.33	0.498225	3.05815e-12	7.63709e-11
ATXN7L2	1p13.3	0.498195	3.06878e-12	7.6468e-11
VPS26A	10q22.1	-0.498188	3.07124e-12	7.6468e-11
SHLD2P1	10q11.22	-0.497896	3.1763e-12	7.89654e-11
AP3B1	5q14.1	-0.497599	3.28661e-12	8.15855e-11
CNIH1	14q22.2	-0.497583	3.29275e-12	8.16159e-11
LY6E	8q24.3	0.497337	3.38707e-12	8.38287e-11
CCDC124	19p13.11	0.497128	3.46921e-12	8.5734e-11
STK40	1p34.3	0.496999	3.5213e-12	8.68918e-11
MLF2	12p13.31	0.496973	3.53162e-12	8.70172e-11
VARS2	6p21.33	0.496366	3.78629e-12	9.3154e-11
ABCD1	Xq28	0.496343	3.79636e-12	9.32635e-11
KYAT3	1p22.2	-0.496222	3.84912e-12	9.442e-11
SNAPC4	9q34.3	0.495726	4.07386e-12	9.97855e-11
MBD1	18q21.1	0.495631	4.11835e-12	1.00605e-10
MTA1	14q32.33	0.495629	4.11944e-12	1.00605e-10
MBD3	19p13.3	0.495608	4.12927e-12	1.00697e-10
HAUS6	9p22.1	-0.495476	4.19207e-12	1.02079e-10
SUDS3	12q24.23	-0.495075	4.3884e-12	1.06703e-10
SHLD2P3	10q11.22	-0.495044	4.40394e-12	1.06924e-10
PPP6R1	19q13.42	0.495026	4.41283e-12	1.06984e-10
SPTSSA	14q13.1	-0.494628	4.61797e-12	1.11794e-10
C1ORF122	1p34.3	0.494597	4.63385e-12	1.12015e-10
SCARNA7	3q25.22	-0.494393	4.74272e-12	1.1448e-10
TRMT1	19p13.13	0.494261	4.81456e-12	1.16046e-10
STAM2	2q23.3	-0.494157	4.87202e-12	1.1726e-10
DCP2	5q22.2	-0.493907	5.01266e-12	1.20455e-10
NAPRT	8q24.3	0.493895	5.01927e-12	1.20455e-10
TMC8	17q25.3	0.4938	5.07375e-12	1.21587e-10
AAAS	12q13.13	0.493786	5.08177e-12	1.21604e-10
MRTFA	22q13.1-q13.2	0.493659	5.15588e-12	1.232e-10
SPHAR	1q42.13	-0.493571	5.20753e-12	1.24255e-10
TXNRD2	22q11.21	0.493557	5.21593e-12	1.24277e-10
FBXO44	1p36.22	0.493503	5.24758e-12	1.24852e-10
TONSL	8q24.3	0.493341	5.34508e-12	1.2699e-10
EIF2S1	14q23.3	-0.493154	5.46009e-12	1.29537e-10
PDLIM7	5q35.3	0.49288	5.63196e-12	1.33424e-10
NOTCH1	9q34.3	0.492729	5.72886e-12	1.35526e-10
RAB18	10p12.1	-0.492623	5.79823e-12	1.36972e-10
POLD4	11q13.2	0.492421	5.93221e-12	1.39938e-10
TUBG2	17q21.2	0.492308	6.00888e-12	1.41545e-10
RPS6KA4	11q13.1	0.492124	6.13453e-12	1.43968e-10
GPS1	17q25.3	0.49212	6.13755e-12	1.43968e-10
TAF6	7q22.1	0.49212	6.13774e-12	1.43968e-10
NPRL2	3p21.31	0.492064	6.17644e-12	1.44671e-10
SMG9	19q13.31	0.492052	6.18514e-12	1.44671e-10
TMPO	12q23.1	-0.491992	6.22677e-12	1.4544e-10
YAF2	12q12	-0.491923	6.27585e-12	1.46381e-10
NAT9	17q25.2	0.491865	6.31704e-12	1.47135e-10
ZNF362	1p35.1	0.491791	6.37015e-12	1.48034e-10
LRFN1	19q13.2	0.491786	6.37349e-12	1.48034e-10
NOXA1	9q34.3	0.491745	6.40318e-12	1.48357e-10
FAM110A	20p13	0.491742	6.40524e-12	1.48357e-10
UBE3A	15q11.2	-0.491575	6.52697e-12	1.50966e-10
ESS2	22q11.21	0.491531	6.55947e-12	1.51506e-10
TIGD5	8q24.3	0.491401	6.65616e-12	1.53526e-10
MPG	16p13.3	0.491103	6.88399e-12	1.58561e-10
ZNF446	19q13.43	0.491063	6.91482e-12	1.5905e-10
ZCCHC10	5q31.1	-0.49101	6.95645e-12	1.59774e-10
LZTS2	10q24.31	0.490998	6.96553e-12	1.59774e-10
SETD1B	12q24.31	0.490827	7.10129e-12	1.62664e-10
CAAP1	9p21.2	-0.490813	7.11241e-12	1.62694e-10
LRRC40	1p31.1	-0.490757	7.15706e-12	1.6349e-10
R3HCC1	8p21.3	0.490701	7.20198e-12	1.6429e-10
ARRDC1-AS1	9q34.3	0.490627	7.2623e-12	1.65439e-10
THOC6	16p13.3	0.490493	7.37288e-12	1.67728e-10
MINK1	17p13.2	0.490421	7.43265e-12	1.68856e-10
RSBN1L	7q11.23	-0.490333	7.50657e-12	1.70303e-10
DPH3	3p25.1	-0.490233	7.59106e-12	1.71985e-10
MOB2	11p15.5	0.490196	7.62274e-12	1.72367e-10
PEF1	1p35.2	0.490189	7.62869e-12	1.72367e-10
CXXC1	18q21.1	0.490013	7.78103e-12	1.7557e-10
DGKZ	11p11.2	0.489596	8.15372e-12	1.8373e-10
HRAS	11p15.5	0.489485	8.25599e-12	1.85782e-10
TRIM11	1q42.13	0.489454	8.28391e-12	1.86158e-10
TMEM165	4q12	-0.489381	8.35274e-12	1.87451e-10
BET1L	11p15.5	0.48935	8.38124e-12	1.87837e-10
ARFGAP2	11p11.2	0.489322	8.40738e-12	1.88169e-10
LCAT	16q22.1	0.489146	8.5748e-12	1.91658e-10
DPF2	11q13.1	0.488847	8.8664e-12	1.97909e-10
OXLD1	17q25.3	0.488708	9.00529e-12	2.00739e-10
METTL26	16p13.3	0.488581	9.13446e-12	2.03346e-10
TIPRL	1q24.2	-0.488562	9.15339e-12	2.03495e-10
KEAP1	19p13.2	0.488437	9.28222e-12	2.06083e-10
NFKBIL1	6p21.33	0.488308	9.41709e-12	2.08798e-10
RTEL1	20q13.33	0.488238	9.49103e-12	2.10157e-10
THAP7	22q11.21	0.488203	9.52792e-12	2.10685e-10
KAT2A	17q21.2	0.488191	9.54025e-12	2.10685e-10
IMP4	2q21.1	0.488053	9.68906e-12	2.13687e-10
C11ORF58	11p15.2	-0.487992	9.75469e-12	2.14849e-10
PSKH1	16q22.1	0.487963	9.78628e-12	2.15259e-10
MARK4	19q13.32	0.48795	9.80016e-12	2.1528e-10
KCTD13	16p11.2	0.487861	9.89781e-12	2.17137e-10
PPM1F	22q11.22	0.48779	9.97639e-12	2.18572e-10
ARHGAP27	17q21.31	0.487767	1.00022e-11	2.18849e-10
TRIM28	19q13.43	0.487503	1.03008e-11	2.25087e-10
WASH3P	15q26.3	0.48744	1.03728e-11	2.26362e-10
SLC37A1	21q22.3	0.487352	1.0475e-11	2.28292e-10
CAPN1	11q13.1	0.487	1.08935e-11	2.37101e-10
EXD3	9q34.3	0.486963	1.09385e-11	2.37768e-10
GIT1	17q11.2	0.486752	1.11977e-11	2.43086e-10
LARP1B	4q28.2	-0.486664	1.13078e-11	2.45154e-10
NSRP1	17q11.2	-0.486611	1.13749e-11	2.45967e-10
ZFPL1	11q13.1	0.486611	1.13749e-11	2.45967e-10
DHX37	12q24.31	0.486432	1.16024e-11	2.5056e-10
KRIT1	7q21.2	-0.486352	1.17054e-11	2.52456e-10
SPTLC1	9q22.31	-0.486217	1.18826e-11	2.55947e-10
NARS1	18q21.31	-0.486087	1.20552e-11	2.5912e-10
ZNF653	19p13.2	0.486074	1.20718e-11	2.5912e-10
ZNF580	19q13.42	0.486068	1.208e-11	2.5912e-10
UBE2A	Xq24	-0.486059	1.20924e-11	2.5912e-10
ZNF710	15q26.1	0.485846	1.23814e-11	2.64971e-10
MMP23B	1p36.33	0.485767	1.24904e-11	2.66959e-10
FAM126B	2q33.1	-0.485269	1.31975e-11	2.81711e-10
ZNF276	16q24.3	0.485134	1.3395e-11	2.85559e-10
DPP7	9q34.3	0.485016	1.3571e-11	2.8894e-10
CIAO2B	16q22.1	0.484844	1.38317e-11	2.94114e-10
SMIM30	7q31.1	-0.484675	1.40909e-11	2.99243e-10
RAI1	17p11.2	0.484446	1.4452e-11	3.06518e-10
LYL1	19p13.13	0.484203	1.48447e-11	3.14446e-10
POLL	10q24.32	0.484068	1.5066e-11	3.18404e-10
ACO2	22q13.2	0.484066	1.50699e-11	3.18404e-10
PLCH2	1p36.32	0.483686	1.57134e-11	3.31579e-10
YIPF3	6p21.1	0.483669	1.57414e-11	3.31749e-10
GFPT1	2p13.3	-0.4836	1.58622e-11	3.33533e-10
ZNF76	6p21.31	0.483598	1.58663e-11	3.33533e-10
DDA1	19p13.11	0.483584	1.589e-11	3.33611e-10
TRIQK	8q22.1	-0.483333	1.63336e-11	3.4249e-10
PPP1R12A	12q21.2-q21.31	-0.483306	1.63835e-11	3.43104e-10
INPPL1	11q13.4	0.483201	1.65722e-11	3.46618e-10
NEURL4	17p13.1	0.483088	1.67801e-11	3.50524e-10
CYP20A1	2q33.2	-0.482909	1.71118e-11	3.57005e-10
RMI1	9q21.32	-0.482828	1.72647e-11	3.59292e-10
TMEM87A	15q15.1	-0.482828	1.72647e-11	3.59292e-10
RASSF7	11p15.5	0.482766	1.73836e-11	3.61313e-10
CHERP	19p13.11	0.482731	1.74499e-11	3.62239e-10
BCKDK	16p11.2	0.48252	1.78579e-11	3.69971e-10
SYNCRIP	6q14.3	-0.482515	1.78669e-11	3.69971e-10
CLIC3	9q34.3	0.482343	1.82081e-11	3.76565e-10
RAC2	22q13.1	0.482228	1.8438e-11	3.80846e-10
ERLEC1	2p16.2	-0.482114	1.86686e-11	3.85129e-10
AP2A1	19q13.33	0.48198	1.8945e-11	3.90348e-10
TUT1	11q12.3	0.481827	1.92639e-11	3.96426e-10
INO80B	2p13.1	0.481781	1.93623e-11	3.97958e-10
DDX49	19p13.11	0.481766	1.93936e-11	3.98109e-10
NSMF	9q34.3	0.481567	1.98186e-11	4.0633e-10
TMEM63A	1q42.12	0.481542	1.98738e-11	4.0696e-10
TMEM33	4p13	-0.4815	1.99645e-11	4.08314e-10
NPIPA1	16p13.11	0.481243	2.0533e-11	4.18908e-10
DPP9	19p13.3	0.481243	2.0533e-11	4.18908e-10
CALU	7q32.1	-0.481173	2.06893e-11	4.21579e-10
ARHGAP33	19q13.12	0.481146	2.07521e-11	4.22144e-10
PAK2	3q29	-0.481139	2.07678e-11	4.22144e-10
TMED2	12q24.31	-0.480988	2.11117e-11	4.2861e-10
HCFC1	Xq28	0.480932	2.12401e-11	4.30689e-10
VPS16	20p13	0.480809	2.15263e-11	4.35959e-10
PSMC6	14q22.1	-0.480787	2.158e-11	4.36516e-10
RASA4CP	7p13	0.480673	2.18492e-11	4.41423e-10
ABCB8	7q36.1	0.48064	2.19265e-11	4.42357e-10
RSRC1	3q25.32	-0.480631	2.19487e-11	4.42357e-10
PGAP6	16p13.3	0.480592	2.2043e-11	4.4372e-10
STK11IP	2q35	0.480554	2.21322e-11	4.44975e-10
ELL	19p13.11	0.480459	2.23622e-11	4.49056e-10
METTL21A	2q33.3	-0.480232	2.29215e-11	4.59732e-10
TOR4A	9q34.3	0.480216	2.2962e-11	4.59988e-10
YDJC	22q11.21	0.480181	2.30489e-11	4.61173e-10
LRRC47	1p36.32	0.480116	2.32121e-11	4.63879e-10
PPP1R35	7q22.1	0.480089	2.32817e-11	4.6471e-10
FBXO46	19q13.32	0.47988	2.3816e-11	4.74804e-10
ATG12	5q22.3	-0.479856	2.38783e-11	4.75476e-10
JMJD4	1q42.13	0.47962	2.44966e-11	4.87204e-10
FASTK	7q36.1	0.479609	2.45274e-11	4.87234e-10
CDK16	Xp11.3	0.479579	2.46078e-11	4.88245e-10
ARL8B	3p26.1	-0.479458	2.49316e-11	4.93739e-10
PLCB2	15q15.1	0.479454	2.49441e-11	4.93739e-10
MTG1	10q26.3	0.479352	2.52215e-11	4.98634e-10
PPIG	2q31.1	-0.479147	2.57876e-11	5.09221e-10
DRAP1	11q13.1	0.479085	2.59606e-11	5.12027e-10
APEX2	Xp11.21	0.479002	2.61962e-11	5.16062e-10
UBAP1L	15q22.31	0.478985	2.62423e-11	5.16357e-10
CENPK	5q12.3	-0.478812	2.67408e-11	5.25248e-10
PPP2R3C	14q13.2	-0.478798	2.6781e-11	5.25248e-10
NLRP6	11p15.5	0.478795	2.6789e-11	5.25248e-10
PLEKHJ1	19p13.3	0.478654	2.72007e-11	5.3269e-10
TP53I13	17q11.2	0.478524	2.75852e-11	5.39584e-10
NAPG	18p11.22	-0.478513	2.76197e-11	5.39625e-10
SSR1	6p24.3	-0.478376	2.8031e-11	5.46923e-10
PHYKPL	5q35.3	0.478367	2.80591e-11	5.46923e-10
PIGX	3q29	-0.478346	2.81225e-11	5.47147e-10
SPPL2B	19p13.3	0.478341	2.81365e-11	5.47147e-10
FAAP100	17q25.3	0.47832	2.82e-11	5.4774e-10
UNKL	16p13.3	0.478304	2.82495e-11	5.4806e-10
IZUMO4	19p13.3	0.477864	2.96251e-11	5.74077e-10
MRPL23	11p15.5	0.477778	2.99004e-11	5.78737e-10
CFAP410	21q22.3	0.477674	3.02377e-11	5.84584e-10
UBE2E1	3p24.2	-0.477634	3.03674e-11	5.86408e-10
MARS1	12q13.3	0.477609	3.04509e-11	5.86658e-10
TAF1C	16q24.1	0.477609	3.04509e-11	5.86658e-10
FBXO41	2p13.2	0.477541	3.06724e-11	5.90239e-10
PPM1B	2p21	-0.477208	3.17952e-11	6.11137e-10
LENG8	19q13.42	0.477194	3.18428e-11	6.11345e-10
AP1B1	22q12.2	0.477178	3.18985e-11	6.11707e-10
SUN2	22q13.1	0.476899	3.28675e-11	6.29563e-10
ZBTB22	6p21.3	0.476883	3.29249e-11	6.29936e-10
MAPK3	16p11.2	0.4768	3.32217e-11	6.34882e-10
ZER1	9q34.11	0.476665	3.37052e-11	6.43383e-10
METTL15	11p14.1	-0.476642	3.37893e-11	6.44247e-10
GTF2F2	13q14.12-q14.13	-0.476485	3.43663e-11	6.54236e-10
TMCO4	1p36.13	0.476478	3.4392e-11	6.54236e-10
LSM12	17q21.31	-0.476424	3.45895e-11	6.57239e-10
PIGQ	16p13.3	0.476346	3.48834e-11	6.62067e-10
ANP32A	15q23	-0.476332	3.49355e-11	6.62299e-10
ABTB1	3q21.3	0.476188	3.54785e-11	6.71729e-10
MRPL43	10q24.31	0.476179	3.55138e-11	6.71729e-10
STRN3	14q12	-0.476054	3.59939e-11	6.80035e-10
UNC13D	17q25.3	0.475989	3.62453e-11	6.84006e-10
AKAP9	7q21.2	-0.475972	3.63084e-11	6.8442e-10
NOC4L	12q24.33	0.475873	3.66985e-11	6.90205e-10
SUMO1P3	1q23.2	-0.475873	3.66985e-11	6.90205e-10
DYNC1LI1	3p22.3	-0.475736	3.72403e-11	6.99333e-10
HNRNPA2B1	7p15.2	-0.475729	3.7268e-11	6.99333e-10
CRY2	11p11.2	0.475405	3.85858e-11	7.23245e-10
MED4	13q14.2	-0.475333	3.88837e-11	7.2727e-10
ITFG1	16q12.1	-0.475328	3.8903e-11	7.2727e-10
WDTC1	1p36.11	0.475321	3.89319e-11	7.2727e-10
AP2M1	3q27.1	0.475238	3.92811e-11	7.32967e-10
PNPLA7	9q34.3	0.475152	3.9643e-11	7.38891e-10
DNAJC21	5p13.2	-0.475138	3.9702e-11	7.39161e-10
FMNL1	17q21.31	0.475027	4.01771e-11	7.47169e-10
GALT	9p13.3	0.474994	4.03167e-11	7.48926e-10
ZFYVE27	10q24.2	0.47495	4.05069e-11	7.51619e-10
UBALD2	17q25.1	0.474848	4.09508e-11	7.59007e-10
PPP4R2	3p13	-0.474809	4.11235e-11	7.61359e-10
LRRC19	9p21.2	-0.47476	4.13379e-11	7.64475e-10
ZNF513	2p23.3	0.474742	4.14199e-11	7.65139e-10
SCLT1	4q28.2	-0.474345	4.32097e-11	7.97021e-10
RARS1	5q34	-0.474338	4.32417e-11	7.97021e-10
VPS54	2p15-p14	-0.474234	4.37254e-11	8.05042e-10
PRPF4B	6p25.2	-0.474204	4.38661e-11	8.06738e-10
C16ORF86	16q22.1	0.474051	4.45873e-11	8.19094e-10
PRIM2	6p11.2	-0.47394	4.51189e-11	8.27945e-10
CLPP	19p13.3	0.473886	4.53759e-11	8.31644e-10
CDV3	3q22.1	-0.473877	4.54207e-11	8.31644e-10
MRPS36	5q13.2	-0.473826	4.5668e-11	8.35252e-10
CAMTA2	17p13.2	0.473703	4.62692e-11	8.45317e-10
RAVER1	19p13.2	0.473636	4.66014e-11	8.5045e-10
WAS	Xp11.23	0.473516	4.72029e-11	8.60481e-10
DEAF1	11p15.5	0.473381	4.78827e-11	8.71916e-10
MORF4L1	15q25.1	-0.47299	4.99179e-11	9.0798e-10
ACOT13	6p22.3	-0.472869	5.05608e-11	9.18669e-10
NPEPPS	17q21.32	-0.47285	5.06604e-11	9.19473e-10
INAFM1	19q13.32	0.47282	5.08227e-11	9.21411e-10
CABIN1	22q11.23	0.472751	5.11992e-11	9.27224e-10
SCAND1	20q11.23	0.472667	5.16545e-11	9.3445e-10
MLLT6	17q12	0.472656	5.1718e-11	9.34582e-10
LRRC24	8q24.3	0.472553	5.22854e-11	9.43808e-10
SH2D3A	19p13.3	0.472538	5.23705e-11	9.44318e-10
P2RY11	19p13.2	0.472489	5.26415e-11	9.48175e-10
PIAS4	19p13.3	0.472447	5.28749e-11	9.51347e-10
WASH2P	2q14.1	0.472371	5.33053e-11	9.58053e-10
ZNF562	19p13.2	-0.472069	5.50343e-11	9.88059e-10
GNB4	3q26.33	-0.472028	5.52779e-11	9.91361e-10
DYRK1B	19q13.2	0.471993	5.54817e-11	9.93943e-10
MTM1	Xq28	-0.471729	5.70549e-11	1.02102e-09
PSMD5	9q33.2	-0.471706	5.71949e-11	1.02243e-09
PUM2	2p24.1	-0.471615	5.77442e-11	1.03114e-09
DTD2	14q12	-0.471573	5.79995e-11	1.03458e-09
DMAC2	19q13.2	0.471562	5.80706e-11	1.03474e-09
CCS	11q13.2	0.471527	5.82827e-11	1.03741e-09
LYSMD3	5q14.3	-0.471499	5.8456e-11	1.03938e-09
LNX1	4q12	-0.471485	5.8542e-11	1.03979e-09
ARL13B	3q11.1-q11.2	-0.471413	5.89882e-11	1.0466e-09
SLC12A4	16q22.1	0.47121	6.02728e-11	1.06825e-09
SEC63	6q21	-0.471029	6.14341e-11	1.08767e-09
USP16	21q21	-0.470975	6.17864e-11	1.09274e-09
C1ORF159	1p36.33	0.470922	6.21291e-11	1.09764e-09
SCARNA9	11q21	-0.470869	6.24794e-11	1.10265e-09
YIPF5	5q31.3	-0.470802	6.29239e-11	1.10932e-09
PAK4	19q13.2	0.470774	6.31087e-11	1.1114e-09
TRIM41	5q35.3	0.470704	6.35731e-11	1.11839e-09
C18ORF32	18q21.1	-0.470424	6.54798e-11	1.15071e-09
ACOT8	20q13.12	0.470315	6.62353e-11	1.16276e-09
UBE2N	12q22	-0.470259	6.66243e-11	1.16835e-09
RBAK	7p22.1	-0.470227	6.68523e-11	1.17111e-09
C12ORF29	12q21.32	-0.47019	6.71137e-11	1.17446e-09
EEA1	12q22	-0.47015	6.73926e-11	1.17809e-09
VPS52	6p21.32	0.470069	6.79703e-11	1.18694e-09
RELL2	5q31.3	0.470055	6.80698e-11	1.18743e-09
SNAPC2	19p13.2	0.470023	6.83026e-11	1.19024e-09
VTA1	6q24.1-q24.2	-0.469974	6.86531e-11	1.1951e-09
PWWP2A	5q33.3	-0.469928	6.89886e-11	1.19968e-09
LIN37	19q13.12	0.469608	7.13472e-11	1.2394e-09
DARS1	2q21.3	-0.469388	7.30161e-11	1.26706e-09
RELT	11q13.4	0.469318	7.3551e-11	1.27461e-09
SARNP	12q13.2	-0.469311	7.36047e-11	1.27461e-09
PGGHG	11p15.5	0.4693	7.36942e-11	1.27483e-09
PLCB3	11q13.1	0.469121	7.50871e-11	1.29758e-09
SLC25A1	22q11.21	0.469061	7.55631e-11	1.30445e-09
XPO6	16p12.1	0.468991	7.6116e-11	1.31235e-09
KCNH4	17q21.2	0.468984	7.61792e-11	1.31235e-09
GPX4	19p13.3	0.468762	7.79686e-11	1.34179e-09
UTP11	1p34.3	-0.46875	7.80633e-11	1.34203e-09
HSPBP1	19q13.42	0.468632	7.90357e-11	1.35734e-09
CHKB	22q13.33	0.468528	7.99035e-11	1.37082e-09
TMEM201	1p36.22	0.468486	8.02532e-11	1.3754e-09
RAB1B	11q13.2	0.468241	8.23429e-11	1.40976e-09
EGLN2	19q13.2	0.468101	8.3549e-11	1.42894e-09
TMEM161A	19p13.11	0.467976	8.46491e-11	1.44626e-09
DNAJC3	13q32.1	-0.467856	8.57217e-11	1.46308e-09
CSNK1D	17q25.3	0.467844	8.58255e-11	1.46335e-09
THAP5	7q31.1	-0.46777	8.64929e-11	1.47322e-09
NUP54	4q21.1	-0.467622	8.78428e-11	1.49468e-09
TAX1BP1	7p15.2	-0.467596	8.80768e-11	1.49713e-09
PI4KA	22q11.21	0.467522	8.87612e-11	1.50722e-09
NAA10	Xq28	0.467397	8.99277e-11	1.52546e-09
KPTN	19q13.32	0.467276	9.10651e-11	1.54235e-09
ANAPC11	17q25.3	0.467272	9.11091e-11	1.54235e-09
HIC2	22q11.21	0.467038	9.33592e-11	1.57883e-09
FEZ2	2p22.2	-0.466868	9.50189e-11	1.60527e-09
MEF2B	19p13.11	0.466697	9.67306e-11	1.63252e-09
ZNF672	1q44	0.466625	9.74564e-11	1.64311e-09
TOM1L2	17p11.2	0.466611	9.75975e-11	1.64382e-09
USP8	15q21.2	-0.466549	9.8235e-11	1.65288e-09
GFUS	8q24.3	0.466488	9.88526e-11	1.66158e-09
DAXX	6p21.32	0.466465	9.90911e-11	1.66391e-09
CCSAP	1q42.13	-0.466454	9.92106e-11	1.66423e-09
TSPAN32	11p15.5	0.466375	1.00027e-10	1.67623e-09
PJA2	5q21.3	-0.46627	1.01117e-10	1.69279e-09
LYRM2	6q15	-0.466238	1.01459e-10	1.6968e-09
JMJD8	16p13.3	0.466189	1.01973e-10	1.70369e-09
THOP1	19p13.3	0.46606	1.03357e-10	1.72508e-09
BMT2	7q31.1	-0.466029	1.03681e-10	1.72874e-09
NANOS1	10q26.11	-0.466012	1.03865e-10	1.73008e-09
RNF187	1q42.13	0.465991	1.04091e-10	1.7321e-09
DENND10	10q26.11	-0.465805	1.06129e-10	1.76425e-09
MLST8	16p13.3	0.465784	1.06359e-10	1.7663e-09
RPS15	19p13.3	0.465675	1.07568e-10	1.78459e-09
TAZ	Xq28	0.465571	1.08738e-10	1.8022e-09
AZI2	3p24.1	-0.465559	1.08868e-10	1.80257e-09
RECQL5	17q25	0.465489	1.09663e-10	1.81392e-09
TMEM160	19q13.32	0.465334	1.11435e-10	1.84139e-09
ASIC3	7q36.1	0.465297	1.11864e-10	1.84664e-09
PPP3CB	10q22.2	-0.465199	1.13008e-10	1.86368e-09
WASH8P	12p13.33	0.464903	1.16521e-10	1.91971e-09
NBEAL2	3p21.31	0.464875	1.16857e-10	1.92334e-09
SYNGAP1	6p21.32	0.464674	1.1932e-10	1.96192e-09
FAM174C	19p13.3	0.464574	1.20555e-10	1.98028e-09
DPH7	9q34.3	0.464525	1.21163e-10	1.9883e-09
RELB	19q13.32	0.464187	1.25473e-10	2.05698e-09
DEXI	16p13.13	0.464133	1.26176e-10	2.06648e-09
CLCN6	1p36.22	0.463919	1.28983e-10	2.11036e-09
KLC2	11q13.2	0.463865	1.29713e-10	2.12022e-09
WDR13	Xp11.23	0.463712	1.31775e-10	2.15072e-09
TCIRG1	11q13.2	0.463707	1.31838e-10	2.15072e-09
ANO9	11p15.5	0.463529	1.34284e-10	2.18848e-09
GIPC1	19p13.12	0.46338	1.36351e-10	2.21999e-09
CNOT6	5q35.3	-0.463186	1.39111e-10	2.2627e-09
GTF2H4	6p21.33	0.463139	1.39776e-10	2.2713e-09
LRCH4	7q22.1	0.462984	1.42027e-10	2.30561e-09
PSMF1	20p13	0.46294	1.42671e-10	2.31381e-09
TTYH3	7p22.3	0.462912	1.4308e-10	2.31817e-09
DHX57	2p22.1	-0.462803	1.44691e-10	2.34199e-09
YME1L1	10p12.1	-0.462722	1.45902e-10	2.35929e-09
SLC26A1	4p16.3	0.462687	1.46424e-10	2.36543e-09
THAP9	4q21.22	-0.462551	1.48495e-10	2.39655e-09
ABCF3	3q27.1	0.462472	1.49701e-10	2.41367e-09
C17ORF58	17q24.2	-0.462414	1.50594e-10	2.42571e-09
HIRA	22q11.21	0.462372	1.51236e-10	2.4337e-09
NUDT14	14q32.33	0.46217	1.54401e-10	2.48223e-09
RAMAC	15q25.2	-0.462152	1.54695e-10	2.48455e-09
COMMD10	5q23.1	-0.462085	1.55765e-10	2.49808e-09
PLXNB2	22q13.33	0.46208	1.55839e-10	2.49808e-09
CCDC18	1p22.1	-0.462011	1.56954e-10	2.51353e-09
HLA-E	6p22.1	0.461948	1.57964e-10	2.52726e-09
EXOSC4	8q24.3	0.461818	1.60078e-10	2.55863e-09
MTHFR	1p36.22	0.461767	1.60916e-10	2.56956e-09
ANKRD26	10p12.1	-0.461723	1.61639e-10	2.57862e-09
FAM210A	18p11.21	-0.461661	1.62683e-10	2.59152e-09
ESF1	20p12.1	-0.461656	1.6276e-10	2.59152e-09
QTRT2	3q13.31	-0.461614	1.63457e-10	2.60012e-09
MTIF2	2p16.1	-0.461603	1.63651e-10	2.60072e-09
INTS5	11q12.3	0.461531	1.64859e-10	2.61741e-09
SNW1	14q24.3	-0.461491	1.65525e-10	2.62547e-09
ABRACL	6q24.1	-0.461454	1.66154e-10	2.63294e-09
TSN	2q14.3	-0.461408	1.66944e-10	2.64293e-09
LIMD2	17q23.3	0.461389	1.67261e-10	2.64543e-09
SPTY2D1	11p15.1	-0.461285	1.69055e-10	2.66935e-09
SLC25A28	10q24.2	0.461283	1.69095e-10	2.66935e-09
CETN3	5q14.3	-0.461236	1.69898e-10	2.67949e-09
SIN3B	19p13.11	0.460984	1.74342e-10	2.74696e-09
UCN	2p23.3	0.460926	1.75377e-10	2.76065e-09
TKFC	11q12.2	0.460539	1.82445e-10	2.86919e-09
TCF25	16q24.3	0.460459	1.83934e-10	2.88987e-09
MSH3	5q14.1	-0.459888	1.94965e-10	3.06028e-09
VAC14	16q22.1-q22.2	0.459874	1.95241e-10	3.06172e-09
MRPL30	2q11.2	-0.459851	1.95697e-10	3.06598e-09
CYP2D7	22q13.2	0.459785	1.97017e-10	3.08375e-09
NAA60	16p13.3	0.459707	1.98585e-10	3.10537e-09
HINT3	6q22.32	-0.459637	1.99995e-10	3.12447e-09
ZNF142	2q35	0.459521	2.02365e-10	3.15854e-09
PUS1	12q24.33	0.459498	2.02843e-10	3.16302e-09
BCAP29	7q22.3	-0.459382	2.05247e-10	3.1975e-09
ARAP1	11q13.4	0.459174	2.09643e-10	3.26292e-09
SLC10A7	4q31.22	-0.459164	2.0984e-10	3.26294e-09
MRPL4	19p13.2	0.458935	2.14786e-10	3.33672e-09
ZNF271P	18q12.2	-0.458627	2.21608e-10	3.43948e-09
CASTOR1	22q12.2	0.458478	2.24965e-10	3.48833e-09
DMAP1	1p34.1	0.458307	2.28908e-10	3.54616e-09
FBRSL1	12q24.33	0.458228	2.30742e-10	3.57124e-09
ZNF624	17p11.2	-0.458186	2.31719e-10	3.58136e-09
SCNN1D	1p36.33	0.458182	2.31828e-10	3.58136e-09
KCNJ13	2q37.1	-0.458117	2.33356e-10	3.60162e-09
ELOF1	19p13.2	0.458105	2.3363e-10	3.6025e-09
SCAF11	12q12	-0.457899	2.38557e-10	3.67506e-09
UBL7	15q24.1	0.45782	2.40466e-10	3.70104e-09
PGAM2	7p13	0.457333	2.52588e-10	3.884e-09
CRIPT	2p21	-0.457289	2.53713e-10	3.8977e-09
TMEM267	5p12	-0.457245	2.54843e-10	3.91044e-09
KRTCAP3	2p23.3	0.457239	2.55014e-10	3.91044e-09
BBLN	9q34.11	0.457206	2.55859e-10	3.91978e-09
IRF9	14q12	0.457192	2.56218e-10	3.92167e-09
MSMP	9p13.3	0.457095	2.58747e-10	3.95673e-09
CEP128	14q31.1	-0.457053	2.59838e-10	3.96976e-09
WDR6	3p21.31	0.456942	2.6277e-10	4.01087e-09
AGGF1	5q13.3	-0.456835	2.6561e-10	4.05049e-09
PQBP1	Xp11.23	0.45681	2.66293e-10	4.05718e-09
CHKB-CPT1B	22q13.33	0.456738	2.68228e-10	4.08292e-09
TAF6L	11q12.3	0.456666	2.70177e-10	4.10602e-09
GPX1	3p21.31	0.456664	2.7024e-10	4.10602e-09
LDB1	10q24.32	0.456631	2.71125e-10	4.1157e-09
WDR36	5q22.1	-0.456589	2.72267e-10	4.12926e-09
CLK3	15q24.1	0.456311	2.79998e-10	4.24264e-09
NEURL2	20q13.12	0.456284	2.80783e-10	4.25065e-09
GTF2H2C	5q13.2	-0.456242	2.81964e-10	4.26464e-09
CUL3	2q36.2	-0.456126	2.8527e-10	4.31072e-09
TSR3	16p13.3	0.456029	2.88076e-10	4.34916e-09
CBX3	7p15.2	-0.456001	2.88883e-10	4.35738e-09
RASA3	13q34	0.455936	2.90773e-10	4.38191e-09
FAM204A	10q26.11	-0.455743	2.96448e-10	4.46338e-09
OGFR	20q13.33	0.455556	3.0209e-10	4.5442e-09
ESRRA	11q13.1	0.455537	3.02652e-10	4.54855e-09
C8G	9q34.3	0.455526	3.02999e-10	4.54964e-09
IDE	10q23.33	-0.455477	3.04488e-10	4.56788e-09
TMUB1	7q36.1	0.455387	3.07263e-10	4.60534e-09
MTCH2	11p11.2	-0.455359	3.08121e-10	4.61404e-09
MRPS35	12p11.22	-0.455305	3.09773e-10	4.6346e-09
CENPT	16q22.1	0.455282	3.10494e-10	4.6412e-09
PIP4P1	14q11.2	0.455248	3.11579e-10	4.65323e-09
STIM1	11p15.4	0.455069	3.17204e-10	4.73297e-09
GAMT	19p13.3	0.455048	3.17867e-10	4.73862e-09
PPAN	19p13.2	0.454789	3.26242e-10	4.8591e-09
FAM83G	17p11.2	0.454638	3.312e-10	4.92852e-09
PML	15q24.1	0.454608	3.322e-10	4.93898e-09
PRR5	22q13.31	0.454529	3.3483e-10	4.97363e-09
PDZD4	Xq28	0.454506	3.35607e-10	4.98072e-09
C7ORF50	7p22.3	0.454487	3.3623e-10	4.98551e-09
PSMD12	17q24.2	-0.454223	3.45232e-10	5.11442e-09
OGN	9q22.31	-0.454002	3.52943e-10	5.2225e-09
YIPF4	2p22.3	-0.453996	3.53156e-10	5.2225e-09
SPNS1	16p11.2	0.453952	3.54713e-10	5.24085e-09
PGAP3	17q12	0.453857	3.58095e-10	5.28611e-09
KLHL8	4q22.1	-0.45379	3.60505e-10	5.31697e-09
TMEM86B	19q13.42	0.453468	3.7228e-10	5.48576e-09
ITGB3BP	1p31.3	-0.45344	3.73314e-10	5.49611e-09
LYRM7	5q23.3-q31.1	-0.453359	3.76345e-10	5.53583e-09
GPKOW	Xp11.23	0.453311	3.78121e-10	5.55704e-09
NEK8	17q11.2	0.453236	3.8098e-10	5.5941e-09
CCDC85B	11q13.1	0.453171	3.83451e-10	5.62541e-09
MRPL49	11q13.1	0.453115	3.85581e-10	5.65168e-09
TBC1D13	9q34.11	0.45286	3.95493e-10	5.79185e-09
ZNF692	1q44	0.45283	3.96681e-10	5.80412e-09
EIF5B	2q11.2	-0.452775	3.98872e-10	5.83104e-09
RNF138	18q12.1	-0.452501	4.09879e-10	5.98668e-09
CEP20	16p13.11	-0.452357	4.15774e-10	6.06745e-09
ZNF680	7q11.21	-0.452179	4.2321e-10	6.17054e-09
IL4I1	19q13.33	0.452128	4.25357e-10	6.19641e-09
SUZ12	17q11.2	-0.451977	4.31765e-10	6.28425e-09
EHMT2	6p21.33	0.451903	4.34954e-10	6.32512e-09
FGD3	9q22.31	0.451882	4.35855e-10	6.33268e-09
CSNK1A1	5q32	-0.45163	4.46912e-10	6.48764e-09
KAT5	11q13.1	0.45153	4.51347e-10	6.54631e-09
ATAD3A	1p36.33	0.451441	4.55343e-10	6.59851e-09
BATF	14q24.3	0.451412	4.56664e-10	6.61187e-09
CEP162	6q14.2-q14.3	-0.45137	4.58555e-10	6.63346e-09
MAGT1	Xq21.1	-0.451331	4.60347e-10	6.6536e-09
TLR9	3p21.2	0.451099	4.71031e-10	6.80209e-09
WASH7P	1p36.33	0.450934	4.78761e-10	6.90772e-09
ZMIZ1	10q22.3	0.450786	4.85834e-10	7.00368e-09
BBIP1	10q25.2	-0.450598	4.94931e-10	7.12864e-09
SPDYE1	7p13	-0.450584	4.95611e-10	7.13225e-09
SGO2	2q33.1	-0.450383	5.05579e-10	7.26939e-09
PTK2B	8p21.2	0.450364	5.06505e-10	7.27641e-09
GRIN3B	19p13.3	0.450221	5.13687e-10	7.36759e-09
CTU2	16q24.3	0.45022	5.13739e-10	7.36759e-09
G6PD	Xq28	0.449965	5.26821e-10	7.54217e-09
MRPL41	9q34.3	0.449965	5.26821e-10	7.54217e-09
XRCC4	5q14.2	-0.449711	5.40224e-10	7.72739e-09
ZGLP1	19p13.2	0.449609	5.45677e-10	7.79868e-09
HAUS1	18q21.1	-0.449548	5.48925e-10	7.83834e-09
COMTD1	10q22.2	0.449301	5.62472e-10	8.01821e-09
SEPTIN7	7p14.2	-0.4493	5.62487e-10	8.01821e-09
SLC26A2	5q32	-0.449166	5.69973e-10	8.11796e-09
MOV10	1p13.2	0.449022	5.78082e-10	8.22639e-09
F12	5q35.3	0.448843	5.88358e-10	8.36547e-09
DRG2	17p11.2	0.448698	5.96805e-10	8.4783e-09
SREBF2	22q13.2	0.448672	5.983e-10	8.49228e-09
RABL6	9q34.3	0.448589	6.03221e-10	8.54994e-09
THAP3	1p36.31	0.448582	6.03632e-10	8.54994e-09
PPP1CA	11q13.2	0.448577	6.03907e-10	8.54994e-09
SRCAP	16p11.2	0.448517	6.07489e-10	8.59333e-09
C15ORF39	15q24.2	0.448501	6.08457e-10	8.5997e-09
ANKMY1	2q37.3	0.448464	6.10675e-10	8.6237e-09
PHACTR2-AS1	6q24.2	-0.448443	6.11926e-10	8.62866e-09
MBOAT7	19q13.42	0.44844	6.12065e-10	8.62866e-09
SGSM2	17p13.3	0.448338	6.18218e-10	8.70801e-09
ANAPC10	4q31.21	-0.448265	6.22698e-10	8.76369e-09
MTA2	11q12.3	0.448176	6.2813e-10	8.83264e-09
TLE5	19p13.3	0.44816	6.29129e-10	8.83921e-09
UPRT	Xq13.3	-0.44809	6.33431e-10	8.89213e-09
ZNF517	8q24.3	0.448037	6.36748e-10	8.93114e-09
FAM234A	16p13.3	0.4479	6.45334e-10	9.04394e-09
CUL7	6p21.1	0.447819	6.5048e-10	9.10837e-09
UBA6	4q13.2	-0.447757	6.54477e-10	9.15574e-09
SEC62	3q26.2	-0.44774	6.55518e-10	9.15574e-09
SH3TC1	4p16.1	0.44774	6.55518e-10	9.15574e-09
PBRM1	3p21.1	-0.447606	6.64198e-10	9.26918e-09
LRRC56	11p15.5	0.447486	6.72074e-10	9.37123e-09
TARBP2	12q13.13	0.447367	6.79887e-10	9.47222e-09
TOR1AIP1	1q25.2	-0.447314	6.83439e-10	9.51372e-09
PRKRA	2q31.2	-0.447203	6.9091e-10	9.60966e-09
PTBP3	9q32	-0.44705	7.01311e-10	9.74243e-09
DDAH2	6p21.33	0.447045	7.01629e-10	9.74243e-09
EVI5L	19p13.2	0.447024	7.03059e-10	9.75414e-09
ENG	9q34.11	0.446994	7.05131e-10	9.77472e-09
PIGK	1p31.1	-0.446978	7.06249e-10	9.78205e-09
TMEM39B	1p35.2	0.446952	7.08009e-10	9.79825e-09
ARL5A	2q23.3	-0.446934	7.09292e-10	9.80411e-09
CCDC22	Xp11.23	0.446929	7.09613e-10	9.80411e-09
TOP1P1	1q24.3	-0.446737	7.2306e-10	9.9816e-09
NEMF	14q21.3	-0.446637	7.30124e-10	1.00707e-08
SLC25A39	17q21.31	0.446619	7.31427e-10	1.00803e-08
GBA2	9p13.3	0.446531	7.37754e-10	1.01591e-08
TMED5	1p22.1	-0.446494	7.40426e-10	1.01875e-08
ZNF324B	19q13.43	0.446459	7.4294e-10	1.02136e-08
SH2D2A	1q23.1	0.446392	7.47822e-10	1.02722e-08
SAMD10	20q13.33	0.446364	7.49833e-10	1.02874e-08
SDCBP2	20p13	0.446359	7.50171e-10	1.02874e-08
STAU2	8q21.11	-0.446336	7.51887e-10	1.03025e-08
MAP3K1	5q11.2	-0.44632	7.53076e-10	1.03103e-08
SDF4	1p36.33	0.446241	7.58879e-10	1.03811e-08
G3BP1	5q33.1	-0.446144	7.66108e-10	1.04714e-08
VPS36	13q14.3	-0.446106	7.68879e-10	1.05006e-08
CBX6	22q13.1	0.44606	7.72357e-10	1.05395e-08
LINC00265	7p14.1	0.445903	7.84295e-10	1.06896e-08
ZDHHC24	11q13.2	0.445898	7.84649e-10	1.06896e-08
RNGTT	6q15	-0.445879	7.86065e-10	1.07002e-08
SET	9q34.11	-0.445863	7.87307e-10	1.07083e-08
PPP1R32	11q12.2	0.445775	7.94081e-10	1.07916e-08
TAF1B	2p25.1	-0.445715	7.98728e-10	1.08459e-08
SRPK1	6p21.31	-0.445649	8.03874e-10	1.09068e-08
PPP2R3B	Xp22.3 and Yp11.3	0.445539	8.12543e-10	1.10154e-08
LSR	19q13.12	0.445265	8.34419e-10	1.13028e-08
EXOC5	14q22.3	-0.445054	8.51677e-10	1.15271e-08
DBF4	7q21.12	-0.444839	8.69671e-10	1.17611e-08
TYSND1	10q22.1	0.444792	8.73588e-10	1.18045e-08
CCDC88A	2p16.1	-0.444751	8.77128e-10	1.18427e-08
NTMT1	9q34.11	0.444632	8.87234e-10	1.19694e-08
SHOC2	10q25.2	-0.444612	8.89007e-10	1.19836e-08
LBR	1q42.12	-0.444292	9.16997e-10	1.23508e-08
PPP1R3F	Xp11.23	0.443956	9.47275e-10	1.27483e-08
PPIL2	22q11.21	0.443907	9.51743e-10	1.27981e-08
BRCC3	Xq28	-0.443861	9.56041e-10	1.28454e-08
ZNF37A	10p11.1	-0.443791	9.62487e-10	1.29141e-08
PARP3	3p21.2	0.443789	9.62703e-10	1.29141e-08
PIBF1	13q21.33-q22.1	-0.443749	9.66375e-10	1.29529e-08
BRD2	6p21.32	0.44374	9.67241e-10	1.2954e-08
ZNF408	11p11.2	0.443724	9.68758e-10	1.29639e-08
DGCR2	22q11.21	0.443576	9.82738e-10	1.31404e-08
SMNDC1	10q25.2	-0.443481	9.91771e-10	1.32505e-08
TEX261	2p13.3	0.443376	1.00183e-09	1.33664e-08
STUB1	16p13.3	0.443374	1.00205e-09	1.33664e-08
TBCB	19q13.12	0.44323	1.01604e-09	1.35421e-08
CPSF3	2p25.1	-0.443193	1.01968e-09	1.35671e-08
SLC35A3	1p21.2	-0.443189	1.02014e-09	1.35671e-08
ANP32AP1	15q14	-0.443186	1.02037e-09	1.35671e-08
GRAP	17p11.2	0.443056	1.03322e-09	1.37269e-08
RNPS1	16p13.3	0.443029	1.03599e-09	1.37528e-08
CDK7	5q13.2	-0.443015	1.03736e-09	1.37599e-08
ACAP1	17p13.1	0.442957	1.04319e-09	1.38263e-08
METTL17	14q11.2	0.442917	1.04716e-09	1.38678e-08
RPE	2q34	-0.442901	1.0488e-09	1.38784e-08
ATG9A	2q35	0.442725	1.06675e-09	1.40966e-08
AURKAIP1	1p36.33	0.442723	1.06698e-09	1.40966e-08
RGP1	9p13.3	0.442581	1.08161e-09	1.42784e-08
RILP	17p13.3	0.442514	1.08863e-09	1.43597e-08
C2ORF69	2q33.1	-0.4425	1.09009e-09	1.43675e-08
FSD1L	9q31.2	-0.442451	1.0952e-09	1.44235e-08
SLC30A5	5q13.1-q13.2	-0.442322	1.10896e-09	1.45931e-08
FGFR4	5q35.2	0.442248	1.11682e-09	1.46849e-08
RC3H1	1q25.1	-0.442173	1.12489e-09	1.47793e-08
RANGAP1	22q13.2	0.442164	1.1259e-09	1.47808e-08
SSNA1	9q34.3	0.442106	1.13218e-09	1.48516e-08
DHPS	19p13.13	0.442069	1.13623e-09	1.48845e-08
SMPD4	2q21.1	0.442067	1.13648e-09	1.48845e-08
USP5	12p13	0.442053	1.138e-09	1.48926e-08
ZMYM4	1p34.3	-0.442039	1.13952e-09	1.49008e-08
BAZ1A	14q13.1-q13.2	-0.441962	1.14792e-09	1.49989e-08
MRPL55	1q42.13	0.441867	1.15845e-09	1.5116e-08
PGGT1B	5q22.3	-0.441865	1.15871e-09	1.5116e-08
SCFD1	14q12	-0.441803	1.16569e-09	1.51952e-08
CD2BP2	16p11.2	0.441786	1.16751e-09	1.52069e-08
DESI2	1q44	-0.441381	1.21384e-09	1.57961e-08
C5ORF24	5q31.1	-0.441374	1.21465e-09	1.57961e-08
PRR14	16p11.2	0.441351	1.21735e-09	1.58189e-08
DNAJA2	16q11.2	-0.441307	1.2225e-09	1.58734e-08
ARL6IP4	12q24.31	0.441273	1.22638e-09	1.59114e-08
PTOV1	19q13.33	0.441114	1.24524e-09	1.61435e-08
TIMM13	19p13.3	0.441082	1.24912e-09	1.61811e-08
SPG7	16q24.3	0.441065	1.25106e-09	1.61936e-08
SLC25A6	Xp22.32 and Yp11.3	0.440917	1.26896e-09	1.64125e-08
AP3S1	5q22.3-q23.1	-0.440901	1.27093e-09	1.64234e-08
THAP4	2q37.3	0.440894	1.27178e-09	1.64234e-08
ATPSCKMT	5p15.2	-0.440734	1.2914e-09	1.66637e-08
TEDC1	14q32.33	0.440718	1.29337e-09	1.66762e-08
HMGB3	Xq28	-0.440658	1.30088e-09	1.676e-08
CCDC88B	11q13.1	0.440627	1.30463e-09	1.67954e-08
RTCA	1p21.2	-0.44056	1.31305e-09	1.68906e-08
CYTH4	22q13.1	0.440549	1.3145e-09	1.68962e-08
EXOC3	5p15.33	0.440458	1.32591e-09	1.70297e-08
GET4	7p22.3	0.440444	1.32768e-09	1.70392e-08
RBM34	1q42.3	-0.440361	1.33831e-09	1.71624e-08
RHOT1	17q11.2	-0.440173	1.36253e-09	1.74595e-08
CLINT1	5q33.3	-0.440138	1.36706e-09	1.7504e-08
FLT3LG	19q13.33	0.440129	1.36827e-09	1.7506e-08
JAG2	14q32.33	0.440107	1.37117e-09	1.75296e-08
GPS2	17p13.1	0.439881	1.40105e-09	1.78978e-08
SSR3	3q25.31	-0.439858	1.40415e-09	1.79237e-08
RPAP3	12q13.11	-0.439786	1.4138e-09	1.80331e-08
NOL12	22q13.1	0.439737	1.42038e-09	1.81031e-08
DND1	5q31.3	0.439719	1.4229e-09	1.81212e-08
VPS11	11q23.3	0.439427	1.46303e-09	1.8618e-08
DDX51	12q24.33	0.439415	1.46468e-09	1.86248e-08
FBXO22	15q24.2	-0.438898	1.53854e-09	1.95491e-08
MAGOHB	12p13.2	-0.438866	1.5433e-09	1.95925e-08
NFKB2	10q24.32	0.438859	1.54432e-09	1.95925e-08
CCNC	6q16.2	-0.43885	1.54568e-09	1.95948e-08
UGGT1	2q14.3	-0.438801	1.55285e-09	1.96557e-08
MZF1	19q13.43	0.438801	1.55285e-09	1.96557e-08
NUDT16L1	16p13.3	0.438743	1.56143e-09	1.97492e-08
PDSS2	6q21	-0.438655	1.57456e-09	1.99001e-08
TXNRD1	12q23.3	-0.438641	1.57664e-09	1.99112e-08
CREB1	2q33.3	-0.438609	1.58151e-09	1.99468e-08
TRIM8	10q24.32	0.438606	1.58186e-09	1.99468e-08
TENT2	5q14.1	-0.438569	1.58744e-09	2.0002e-08
TNFRSF6B	20q13.33	0.438456	1.60466e-09	2.02036e-08
CYCS	7p15.3	-0.438319	1.62563e-09	2.04522e-08
GXYLT1	12q12	-0.438178	1.64759e-09	2.07017e-08
FLAD1	1q21.3	0.438175	1.64796e-09	2.07017e-08
RITA1	12q24.13	0.438127	1.65558e-09	2.07818e-08
TANK	2q24.2	-0.437969	1.68048e-09	2.10783e-08
PTDSS2	11p15.5	0.437932	1.68644e-09	2.11371e-08
PLA2G15	16q22.1	0.437904	1.69089e-09	2.11769e-08
TMOD3	15q21.2	-0.437888	1.69349e-09	2.11936e-08
TIMM17B	Xp11.23	0.437795	1.70844e-09	2.13645e-08
SF3A1	22q12.2	0.437749	1.71596e-09	2.14424e-08
SUB1	5p13.3	-0.437566	1.74599e-09	2.18012e-08
UBE2Q2	15q24.2	-0.437506	1.75598e-09	2.19095e-08
H1-10	3q21.3	0.437496	1.75752e-09	2.19123e-08
PRAF2	Xp11.23	0.437473	1.76138e-09	2.19439e-08
SASS6	1p21.2	-0.437281	1.79374e-09	2.23283e-08
FIBP	11q13.1	0.437274	1.79492e-09	2.23283e-08
SHISA5	3p21.31	0.43703	1.83672e-09	2.28311e-08
RPL18	19q13.33	0.436901	1.85939e-09	2.30956e-08
HLA-H	6p22.1	0.43681	1.87534e-09	2.32763e-08
SMPD4BP	2q21.1	0.436757	1.8848e-09	2.33763e-08
NCKAP5L	12q13.12	0.436616	1.91014e-09	2.36729e-08
AP4E1	15q21.2	-0.436381	1.9528e-09	2.41836e-08
SMIM15	5q12.1	-0.436321	1.96394e-09	2.42906e-08
FAM20B	1q25.2	-0.436319	1.96437e-09	2.42906e-08
LIN52	14q24.3	-0.43631	1.96608e-09	2.42937e-08
ZDHHC18	1p36.11	0.436228	1.98118e-09	2.44621e-08
MAT2B	5q34	-0.436055	2.01391e-09	2.48478e-08
PRKCI	3q26.2	-0.435767	2.06918e-09	2.55107e-08
RNFT1	17q23.1	-0.435712	2.08004e-09	2.56233e-08
ZNF512B	20q13.33	0.435705	2.08141e-09	2.56233e-08
CARMIL3	14q11.2	0.435646	2.09297e-09	2.57366e-08
MAN2C1	15q24.2	0.435642	2.0937e-09	2.57366e-08
MRPS12	19q13.2	0.435457	2.13055e-09	2.61701e-08
C5ORF22	5p13.3	-0.43536	2.15009e-09	2.63906e-08
TWF2	3p21.2	0.435243	2.17369e-09	2.66606e-08
ST8SIA4	5q21.1	-0.435116	2.19989e-09	2.6962e-08
TRAPPC5	19p13.2	0.435097	2.20372e-09	2.69891e-08
ANKRD12	18p11.22	-0.435067	2.20997e-09	2.70457e-08
AARS2	6p21.1	0.435009	2.22203e-09	2.71687e-08
SCX	8q24.3	0.434998	2.22433e-09	2.71687e-08
LRSAM1	9q33.3-q34.11	0.434995	2.22493e-09	2.71687e-08
BST2	19p13.11	0.434975	2.2293e-09	2.7202e-08
EEF1D	8q24.3	0.434919	2.24097e-09	2.73244e-08
CCDC61	19q13.32	0.434907	2.24341e-09	2.73341e-08
PEX10	1p36.32	0.434884	2.2483e-09	2.73735e-08
MRPL20-AS1	1p36.33	0.434866	2.25222e-09	2.74011e-08
INTS6	13q14.3	-0.434778	2.27091e-09	2.76084e-08
PRPF6	20q13.33	0.434752	2.2763e-09	2.76536e-08
AP5S1	20p13	0.434685	2.29075e-09	2.78089e-08
DNAJC7	17q21.2	-0.434643	2.29974e-09	2.78975e-08
CD81	11p15.5	0.434581	2.31322e-09	2.80406e-08
INF2	14q32.33	0.434391	2.35487e-09	2.85246e-08
NRAS	1p13.2	-0.434323	2.36975e-09	2.8684e-08
CSAD	12q13.13	0.434249	2.38627e-09	2.8863e-08
RTN2	19q13.32	0.434219	2.39302e-09	2.89235e-08
KRCC1	2p11.2	-0.434191	2.39926e-09	2.89779e-08
PI4KAP2	22q11.21	0.43418	2.40187e-09	2.89882e-08
RALY	20q11.22	0.434124	2.41441e-09	2.91185e-08
MPI	15q24.1	0.434073	2.42597e-09	2.92366e-08
TM9SF3	10q24.1	-0.434059	2.42913e-09	2.92535e-08
CCHCR1	6p21.33	0.433976	2.44818e-09	2.94615e-08
CHMP6	17q25.3	0.433929	2.45883e-09	2.95682e-08
SASH3	Xq26.1	0.433549	2.54782e-09	3.06162e-08
AKNA	9q32	0.433475	2.56554e-09	3.08069e-08
RSL24D1	15q21.3	-0.433387	2.58674e-09	3.1039e-08
CLUH	17p13.3	0.433116	2.65308e-09	3.18121e-08
LSP1	11p15.5	0.433058	2.66747e-09	3.19523e-08
EIF4EBP2	10q22.1	-0.433053	2.66862e-09	3.19523e-08
ZNF440	19p13.2	-0.432817	2.72813e-09	3.26413e-08
TMEM109	11q12.2	0.432777	2.73817e-09	3.27378e-08
HNRNPK	9q21.32	-0.432697	2.7589e-09	3.29619e-08
PURB	7p13	-0.43265	2.77091e-09	3.30816e-08
TMEM79	1q22	0.432585	2.78772e-09	3.32583e-08
MEMO1	2p22.3	-0.432527	2.80281e-09	3.34144e-08
DIAPH2	Xq21.33	-0.432513	2.80644e-09	3.34337e-08
AGPAT2	9q34.3	0.432381	2.84119e-09	3.38234e-08
MCRIP2	16p13.3	0.432351	2.84917e-09	3.38941e-08
AGPS	2q31.2	-0.432274	2.86953e-09	3.41119e-08
ISG15	1p36.33	0.43223	2.88132e-09	3.42275e-08
CPSF2	14q32.12	-0.432212	2.8863e-09	3.42621e-08
KLHL17	1p36.33	0.431885	2.97538e-09	3.52944e-08
ASMTL	Xp22.3 and Yp11.3	0.431864	2.98116e-09	3.53377e-08
TEX264	3p21.2	0.431792	3.00114e-09	3.55491e-08
CHORDC1P4	18p11.31	-0.431767	3.00826e-09	3.56081e-08
NCAPH2	22q13.33	0.431727	3.01929e-09	3.57132e-08
CEACAM21	19q13.2	0.43169	3.02971e-09	3.5811e-08
NFYB	12q23.3	-0.431679	3.03298e-09	3.58241e-08
MAPK9	5q35.3	-0.431517	3.07903e-09	3.63422e-08
ABCA2	9q34.3	0.431331	3.13249e-09	3.69469e-08
UCP2	11q13.4	0.431294	3.14329e-09	3.7048e-08
TBC1D9B	5q35.3	0.431241	3.15887e-09	3.72053e-08
NUMBL	19q13.2	0.431095	3.20195e-09	3.76859e-08
TMEM141	9q34.3	0.43097	3.23932e-09	3.80987e-08
NHLRC4	16p13.3	0.430946	3.24629e-09	3.81536e-08
RAP1B	12q15	-0.430926	3.25257e-09	3.82004e-08
KIAA0825	5q15	-0.430724	3.31391e-09	3.88933e-08
LIN7C	11p14.1	-0.430685	3.32602e-09	3.90079e-08
GTF3C1	16p12.1	0.430657	3.3346e-09	3.90809e-08
ADAMTS10	19p13.2	0.430643	3.3389e-09	3.91037e-08
HSF4	16q22.1	0.430573	3.36046e-09	3.93285e-08
CCR10	17q21.2	0.430537	3.37162e-09	3.94314e-08
ZFPM1	16q24.2	0.430448	3.39962e-09	3.97308e-08
CLDND1	3q11.2	-0.430346	3.43184e-09	4.00792e-08
SHLD2	10q23.2	-0.430316	3.44142e-09	4.01628e-08
PSMA4	15q25.1	-0.430281	3.45251e-09	4.0216e-08
PARVB	22q13.31	0.430279	3.45325e-09	4.0216e-08
RBMS1	2q24.2	-0.430279	3.45325e-09	4.0216e-08
PDS5B	13q13.1	-0.430233	3.46808e-09	4.03582e-08
RPP21	6p22.1	0.430226	3.47031e-09	4.03582e-08
RPS2P32	7p15.3	0.430156	3.4927e-09	4.05901e-08
CLTB	5q35.2	0.429922	3.56908e-09	4.14375e-08
SSPOP	7q36.1	0.429917	3.57061e-09	4.14375e-08
VAPA	18p11.22	-0.429894	3.57826e-09	4.14973e-08
CCDC9B	15q15.1	0.429852	3.59208e-09	4.16285e-08
TPRKB	2p13.1	-0.429808	3.60702e-09	4.17725e-08
MYPOP	19q13.32	0.429771	3.61909e-09	4.1883e-08
IDH3B	20p13	0.429734	3.6315e-09	4.19974e-08
DCAF11	14q12	0.429606	3.67479e-09	4.24685e-08
TCAP	17q12	0.429496	3.7124e-09	4.28733e-08
ZNF768	16p11.2	0.429324	3.77159e-09	4.35149e-08
OCIAD1	4p11	-0.429319	3.7732e-09	4.35149e-08
RWDD1	6q22.1	-0.429199	3.81535e-09	4.39705e-08
TTC31	2p13.1	0.429171	3.82514e-09	4.40528e-08
MNT	17p13.3	0.429129	3.83988e-09	4.41919e-08
POLD1	19q13.3	0.428967	3.8977e-09	4.48262e-08
CLN8	8p23.3	0.42877	3.96904e-09	4.56151e-08
MRPL53	2p13.1	0.42874	3.98006e-09	4.57101e-08
HDAC11	3p25.1	0.428603	4.03045e-09	4.62569e-08
B4GALT3	1q23.3	0.428594	4.03389e-09	4.62643e-08
TBC1D3B	17q12	0.428559	4.04705e-09	4.63833e-08
TMX1	14q22.1	-0.428422	4.09801e-09	4.6935e-08
ABHD13	13q33.3	-0.428371	4.11727e-09	4.71206e-08
LPAR2	19p13.11	0.428364	4.1199e-09	4.71206e-08
TMCO1	1q24.1	-0.42833	4.13299e-09	4.72378e-08
ZNF48	16p11.2	0.428248	4.16436e-09	4.75636e-08
C4ORF48	4p16.3	0.428146	4.20359e-09	4.79787e-08
CARMIL2	16q22.1	0.428096	4.22293e-09	4.81664e-08
KCTD17	22q12.3	0.427996	4.26175e-09	4.85758e-08
YJU2	19p13.3	0.427869	4.31191e-09	4.91138e-08
LMNTD2	11p15.5	0.427748	4.35979e-09	4.96251e-08
STX10	19p13.13	0.427685	4.38495e-09	4.98773e-08
ZC3H3	8q24.3	0.427653	4.39802e-09	4.99917e-08
GZMB	14q12	0.427523	4.45067e-09	5.05555e-08
INIP	9q32	-0.427474	4.47057e-09	5.07469e-08
NDUFA11	19p13.3	0.427384	4.50775e-09	5.1134e-08
UROD	1p34.1	0.427259	4.55973e-09	5.16883e-08
PHLDB3	19q13.31	0.427071	4.63878e-09	5.25462e-08
RAD50	5q31.1	-0.427064	4.64173e-09	5.25462e-08
FAM133CP	10q21.1	-0.42693	4.69918e-09	5.31603e-08
SREK1IP1	5q12.3	-0.426807	4.75217e-09	5.37232e-08
JMJD7-PLA2G4B	15q15.1	0.426765	4.77044e-09	5.3893e-08
NUP50	22q13.31	-0.426501	4.88705e-09	5.51728e-08
PRPS2	Xp22.2	-0.426184	5.03082e-09	5.67573e-08
SLC66A1	1p36.13	0.426163	5.0404e-09	5.68269e-08
MDM2	12q15	-0.425915	5.15573e-09	5.80877e-08
TRAPPC11	4q35.1	-0.425792	5.21379e-09	5.8702e-08
ARFGEF1	8q13.2	-0.42573	5.2435e-09	5.89964e-08
ATP6V0C	16p13.3	0.425597	5.30711e-09	5.96718e-08
CACUL1	10q26.11	-0.425073	5.56625e-09	6.25431e-08
CUEDC2	10q24.32	0.425018	5.59447e-09	6.28177e-08
BRD4	19p13.12	0.424927	5.64063e-09	6.32932e-08
MAN1B1	9q34.3	0.424881	5.66444e-09	6.35175e-08
UBE2L6	11q12.1	0.424729	5.74346e-09	6.43601e-08
PGLS	19p13.11	0.424577	5.82284e-09	6.52056e-08
PELP1	17p13.2	0.424566	5.82897e-09	6.52302e-08
TBCD	17q25.3	0.424531	5.84739e-09	6.53924e-08
SAR1A	10q22.1	-0.424478	5.87562e-09	6.56638e-08
KATNBL1	15q14	-0.424246	6.00061e-09	6.70156e-08
NAPA	19q13.33	0.424174	6.03984e-09	6.74083e-08
S1PR4	19p13.3	0.424088	6.08698e-09	6.78432e-08
CD79A	19q13.2	0.424088	6.08698e-09	6.78432e-08
TBC1D10B	16p11.2	0.424079	6.09209e-09	6.78547e-08
HPS3	3q24	-0.424012	6.12932e-09	6.82236e-08
ELOB	16p13.3	0.423886	6.19973e-09	6.89611e-08
WBP4	13q14.11	-0.42387	6.20834e-09	6.89762e-08
ZNF581	19q13.42	0.423861	6.21355e-09	6.89762e-08
CDKL3	5q31.1	-0.423861	6.21355e-09	6.89762e-08
ITPKC	19q13.2	0.42378	6.25937e-09	6.94384e-08
TMEM168	7q31.1	-0.423757	6.27252e-09	6.95379e-08
PPP1CB	2p23.2	-0.423678	6.31743e-09	6.9989e-08
NME3	16p13.3	0.423622	6.34932e-09	7.02954e-08
DEK	6p22.3	-0.423613	6.35465e-09	7.03075e-08
KIF5B	10p11.22	-0.423597	6.36398e-09	7.03467e-08
SMCHD1	18p11.32	-0.423592	6.36665e-09	7.03467e-08
MAN1B1-DT	9q34.3	0.423581	6.37333e-09	7.03711e-08
MRPL47	3q26.33	-0.423574	6.37735e-09	7.03711e-08
CRLS1	20p12.3	-0.423458	6.44456e-09	7.10656e-08
SSH3	11q13.2	0.423379	6.49066e-09	7.1509e-08
CLN3	16p12.1	0.423374	6.49338e-09	7.1509e-08
CTDSP1	2q35	0.423296	6.53982e-09	7.19726e-08
RBM38	20q13.31	0.422925	6.76266e-09	7.43758e-08
ZC3H18	16q24.2	0.422904	6.77541e-09	7.44667e-08
NAA15	4q31.1	-0.422821	6.82664e-09	7.49802e-08
GUSBP3	5q13.2	-0.42263	6.94473e-09	7.62083e-08
C6ORF62	6p22.3	-0.422626	6.94764e-09	7.62083e-08
HMGB1	13q12.3	-0.422538	7.00305e-09	7.67655e-08
TAS1R3	1p36.33	0.422429	7.07218e-09	7.74721e-08
FRG1	4q35.2	-0.422336	7.13153e-09	7.80707e-08
TMEM191A	22q11.21	0.4223	7.15509e-09	7.8277e-08
WDR45	Xp11.23	0.422255	7.18385e-09	7.854e-08
ADAM15	1q21.3	0.42223	7.20037e-09	7.86688e-08
PRCC	1q23.1	0.422118	7.27289e-09	7.94089e-08
PTP4A1	6q12	-0.422102	7.28353e-09	7.94728e-08
NDUFB7	19p13.12	0.422009	7.34459e-09	8.00864e-08
ANKRD39	2q11.2	0.422	7.35072e-09	8.01007e-08
DPY19L1	7p14.2	-0.421986	7.35993e-09	8.01484e-08
NORAD	20q11.23	-0.421891	7.42315e-09	8.07839e-08
RMDN1	8q21.3	-0.42181	7.47754e-09	8.12669e-08
CDK18	1q32.1	0.421808	7.47893e-09	8.12669e-08
ZNF100	19p13.1	-0.421803	7.48222e-09	8.12669e-08
CTDSPL2	15q15.3-q21.1	-0.421571	7.63982e-09	8.29245e-08
SPATA1	1p22.3	-0.42143	7.73735e-09	8.39283e-08
CCDC9	19q13.32	0.421205	7.89537e-09	8.55865e-08
SEPTIN1	16p11.2	0.421173	7.91841e-09	8.57802e-08
KIAA1143	3p21.31	-0.421133	7.94647e-09	8.60281e-08
MED26	19p13.11	0.421022	8.02622e-09	8.68348e-08
ANTKMT	16p13.3	0.420992	8.04795e-09	8.70132e-08
BMS1P1	10q11.22	-0.420913	8.10506e-09	8.75736e-08
ZCRB1	12q12	-0.420888	8.12361e-09	8.77171e-08
SNRPB	20p13	0.420865	8.14034e-09	8.78406e-08
SELENOF	1p22.3	-0.420839	8.15916e-09	8.79659e-08
VCPKMT	14q21.3	-0.420834	8.16255e-09	8.79659e-08
MGAT1	5q35.3	0.420737	8.23411e-09	8.86796e-08
BORCS8	19p13.11	0.420549	8.37384e-09	9.00863e-08
TM7SF2	11q13.1	0.420547	8.37558e-09	9.00863e-08
SLC7A6OS	16q22.1	0.420533	8.38603e-09	9.01403e-08
CCDC137	17q25.3	0.420424	8.46826e-09	9.09653e-08
CXXC5	5q31.2	0.420385	8.4982e-09	9.12279e-08
ODR4	1q31.1	-0.420273	8.58328e-09	9.20817e-08
MARCHF7	2q24.2	-0.420236	8.61182e-09	9.23282e-08
GCC2	2q12.3	-0.420053	8.75408e-09	9.37929e-08
TRAF7	16p13.3	0.41993	8.85079e-09	9.4768e-08
TFE3	Xp11.23	0.419852	8.91338e-09	9.53766e-08
TUBA8	22q11.21	0.419794	8.95966e-09	9.58101e-08
SIRT1	10q21.3	-0.419682	9.04919e-09	9.67052e-08
CD79B	17q23.3	0.419641	9.08298e-09	9.69616e-08
MEGF8	19q13.2	0.419638	9.08486e-09	9.69616e-08
CEMP1	16p13.3	0.419627	9.09427e-09	9.69997e-08
ANAPC13	3q22.2	-0.419611	9.10746e-09	9.70781e-08
METTL14	4q26	-0.419562	9.14714e-09	9.74385e-08
ANKRD9	14q32.31	0.419409	9.27294e-09	9.87152e-08
PPP4R3B	2p16.1	-0.419397	9.28254e-09	9.87541e-08
TMX4	20p12.3	-0.419321	9.34613e-09	9.93669e-08
ACSS1	20p11.21	0.419228	9.42377e-09	1.00128e-07
PNO1	2p14	-0.419168	9.47456e-09	1.00604e-07
ANKRD52	12q13.3	0.419089	9.54139e-09	1.01248e-07
DPP8	15q22.31	-0.419075	9.55323e-09	1.01309e-07
ULK1	12q24.33	0.419059	9.56706e-09	1.01391e-07
ARL1	12q23.2	-0.418966	9.64647e-09	1.02168e-07
SCARF2	22q11.21	0.418781	9.80719e-09	1.03804e-07
RNF170	8p11.21	-0.418753	9.83151e-09	1.03995e-07
LTB	6p21.33	0.418642	9.92941e-09	1.04964e-07
ECM2	9q22.31	-0.418561	1.00014e-08	1.05657e-07
LAMP2	Xq24	-0.418542	1.00179e-08	1.05764e-07
LSS	21q22.3	0.418521	1.00365e-08	1.05894e-07
ZNF775	7q36.1	0.418394	1.0151e-08	1.07034e-07
RPS9	19q13.42	0.418368	1.01741e-08	1.07209e-07
MAPK14	6p21.31	-0.418329	1.02098e-08	1.07517e-07
FNDC3B	3q26.31	-0.418285	1.02499e-08	1.07871e-07
CEPT1	1p13.3	-0.41813	1.03924e-08	1.09301e-07
TOPORS	9p21.1	-0.418039	1.04762e-08	1.10113e-07
PACSIN1	6p21.3	0.417976	1.0535e-08	1.10661e-07
NCBP1	9q22.33	-0.417963	1.05475e-08	1.10722e-07
NFKBIE	6p21.1	0.417933	1.0576e-08	1.10951e-07
STARD5	15q25.1	0.417919	1.0589e-08	1.11018e-07
GEN1	2p24.2	-0.41787	1.06349e-08	1.11428e-07
CNKSR1	1p36.11	0.417854	1.06503e-08	1.11519e-07
KATNB1	16q21	0.417745	1.07538e-08	1.12532e-07
MLXIP	12q21.31	0.417724	1.07737e-08	1.12645e-07
SZT2	1p34.2	-0.417719	1.07782e-08	1.12645e-07
PPP1R18	6p21.33	0.417666	1.08293e-08	1.13108e-07
SFN	1p36.11	0.417577	1.09156e-08	1.13938e-07
CIRBP	19p13.3	0.417529	1.09615e-08	1.14345e-07
GCN1	12q24.23	0.417506	1.09841e-08	1.14507e-07
SCAMP2	15q24.1	0.417499	1.09908e-08	1.14507e-07
MTPAP	10p11.23	-0.417453	1.10361e-08	1.14907e-07
ALG3	3q27.1	0.417353	1.11341e-08	1.15855e-07
DNAJA3	16p13.3	0.417321	1.11662e-08	1.16116e-07
POLM	7p13	0.417246	1.12399e-08	1.16809e-07
CCDC154	16p13.3	0.417186	1.13e-08	1.17361e-07
REC8	14q12	0.416964	1.1525e-08	1.19622e-07
YWHAB	20q13.12	-0.416852	1.16391e-08	1.20731e-07
EXOC7	17q25.1	0.416706	1.17905e-08	1.22225e-07
ZNF782	9q22.33	-0.416679	1.18195e-08	1.2245e-07
TRAPPC14	7q22.1	0.416512	1.19951e-08	1.24191e-07
TPST2	22q12.1	0.416382	1.21338e-08	1.25548e-07
LRP10	14q11.2	0.416338	1.21811e-08	1.25881e-07
RNF122	8p12	0.416338	1.21811e-08	1.25881e-07
LLPH	12q14.3	-0.416319	1.22011e-08	1.26009e-07
PRICKLE4	6p21.1	0.416305	1.22161e-08	1.26086e-07
PTCH2	1p34.1	0.416278	1.22461e-08	1.26318e-07
SLC9A3R1	17q25.1	0.416199	1.23317e-08	1.27121e-07
NR2F6	19p13.11	0.416067	1.24764e-08	1.28533e-07
DENND6A	3p14.3	-0.416032	1.25148e-08	1.28742e-07
COPB1	11p15.2	-0.416032	1.25148e-08	1.28742e-07
PRMT1	19q13.33	0.416027	1.25199e-08	1.28742e-07
COPS7B	2q37.1	0.416	1.25507e-08	1.28978e-07
SDHAF3	7q21.3	-0.415969	1.25841e-08	1.29242e-07
METTL2B	7q32.1	-0.415754	1.28257e-08	1.31642e-07
CCDC120	Xp11.23	0.415719	1.28651e-08	1.31948e-07
KRR1	12q21.2	-0.415714	1.28714e-08	1.31948e-07
MIB1	18q11.2	-0.415592	1.30106e-08	1.33292e-07
TAF12	1p35.3	-0.415555	1.30532e-08	1.33646e-07
RHBDF2	17q25.1	0.415464	1.31576e-08	1.34632e-07
PSMG2	18p11.21	-0.415434	1.31926e-08	1.34907e-07
PPP6C	9q33.3	-0.415351	1.32899e-08	1.35819e-07
TMEM209	7q32.2	-0.415325	1.33195e-08	1.36038e-07
ISOC1	5q23.3	-0.415225	1.34372e-08	1.37156e-07
C5ORF15	5q31.1	-0.415161	1.35142e-08	1.37857e-07
KLHL20	1q25.1	-0.415077	1.36136e-08	1.38785e-07
COMMD2	3q25.1	-0.415061	1.36333e-08	1.38901e-07
OLA1	2q31.1	-0.415012	1.36918e-08	1.39411e-07
POLK	5q13.3	-0.415005	1.37002e-08	1.39411e-07
TPM2	9p13.3	0.414973	1.37394e-08	1.39724e-07
CCDC183-AS1	9q34.3	0.414959	1.37562e-08	1.3981e-07
SRP54	14q13.2	-0.414928	1.37938e-08	1.40107e-07
HTRA2	2p13.1	0.41492	1.3804e-08	1.40124e-07
NSUN5P1	7q11.23	0.414838	1.39028e-08	1.41041e-07
SARS2	19q13.2	0.414771	1.39853e-08	1.41791e-07
ACTR2	2p14	-0.414748	1.40135e-08	1.41907e-07
PCNP	3q12.3	-0.414748	1.40138e-08	1.41907e-07
RIOK2	5q15	-0.414704	1.40681e-08	1.42313e-07
MROH1	8q24.3	0.414702	1.4071e-08	1.42313e-07
BCAS2	1p13.2	-0.414623	1.41688e-08	1.43215e-07
SSBP1	7q34	-0.414558	1.42498e-08	1.43946e-07
FNDC11	20q13.33	0.414461	1.43721e-08	1.45093e-07
STAT6	12q13.3	0.414442	1.43957e-08	1.45184e-07
COPS2	15q21.1	-0.41444	1.43986e-08	1.45184e-07
SLC19A1	21q22.3	0.414424	1.44191e-08	1.45302e-07
SRFBP1	5q23.1	-0.414396	1.44544e-08	1.45569e-07
UBXN4	2q21.3	-0.414377	1.44779e-08	1.45718e-07
COPS8	2q37.3	-0.414106	1.48267e-08	1.49138e-07
DNAH1	3p21.1	0.41406	1.48871e-08	1.49655e-07
BAHD1	15q15.1	0.413999	1.4966e-08	1.50357e-07
NKIRAS1	3p24.2	-0.413979	1.49934e-08	1.50542e-07
FAM219A	9p13.3	0.413851	1.51619e-08	1.52142e-07
ATF1	12q13.12	-0.413775	1.52639e-08	1.53073e-07
OGFOD3	17q25.3	0.413765	1.52763e-08	1.53105e-07
PRR29	17q23.3	0.413721	1.53354e-08	1.53604e-07
RPGR	Xp11.4	-0.413638	1.54479e-08	1.54638e-07
BRAP	12q24.12	-0.413619	1.5473e-08	1.54796e-07
IBTK	6q14.1	-0.413561	1.55518e-08	1.5549e-07
ZNF182	Xp11.23	-0.413552	1.55644e-08	1.55522e-07
SEH1L	18p11.21	-0.413522	1.56055e-08	1.5584e-07
DNAJC24	11p13	-0.413483	1.56595e-08	1.56284e-07
COL18A1	21q22.3	0.413394	1.57807e-08	1.57399e-07
SMAD2	18q21.1	-0.4132	1.60518e-08	1.60008e-07
COIL	17q22	-0.41301	1.63208e-08	1.62592e-07
ANKRD24	19p13.3	0.412982	1.63606e-08	1.6289e-07
TREX1	3p21.31	0.41297	1.63772e-08	1.62957e-07
RAB11FIP2	10q26.11	-0.41291	1.64636e-08	1.6372e-07
ZNF674	Xp11.3	-0.412706	1.67597e-08	1.66563e-07
VPS35	16q11.2	-0.412674	1.68072e-08	1.66936e-07
DDTL	22q11.23	0.412655	1.68344e-08	1.67107e-07
GPSM1	9q34.3	0.412616	1.68925e-08	1.67583e-07
POLR1G	19q13.32	0.412599	1.69164e-08	1.67654e-07
GOLGB1	3q13.33	-0.412597	1.69198e-08	1.67654e-07
MIF	22q11.23	0.412562	1.69713e-08	1.68063e-07
TTC1	5q33.3	-0.412518	1.70366e-08	1.6861e-07
SCARB1	12q24.31	0.412484	1.70884e-08	1.69021e-07
POLR3F	20p11.23	-0.412474	1.71022e-08	1.69058e-07
WDR54	2p13.1	0.412437	1.71577e-08	1.69505e-07
ANGEL2	1q32.3	-0.412402	1.72098e-08	1.69919e-07
TOR2A	9q34.11	0.412365	1.72656e-08	1.70368e-07
THAP11	16q22.1	0.412345	1.7297e-08	1.70577e-07
ALG6	1p31.3	-0.412319	1.73352e-08	1.70852e-07
SF3B2	11q13.1	0.412291	1.73776e-08	1.71169e-07
MCOLN1	19p13.2	0.412282	1.73917e-08	1.71206e-07
CLSTN1	1p36.22	0.412066	1.77216e-08	1.7435e-07
ENGASE	17q25.3	0.412004	1.78185e-08	1.752e-07
TMEM192	4q32.3	-0.411723	1.82591e-08	1.79426e-07
FBXO28	1q42.11	-0.411633	1.8403e-08	1.80732e-07
MAFK	7p22.3	0.411626	1.84145e-08	1.80738e-07
API5	11p12	-0.411589	1.8474e-08	1.81215e-07
RBM26	13q31.1	-0.411566	1.85113e-08	1.81474e-07
ERO1A	14q22.1	-0.411464	1.86763e-08	1.82983e-07
DEDD2	19q13.2	0.41145	1.86989e-08	1.83097e-07
ECSIT	19p13.2	0.411422	1.87442e-08	1.83432e-07
LSM4	19p13.11	0.411369	1.88313e-08	1.84176e-07
GLMN	1p22.1	-0.411341	1.88769e-08	1.84513e-07
CLDND2	19q13.41	0.411274	1.89875e-08	1.85376e-07
LINC02908	9q34.3	0.411274	1.89875e-08	1.85376e-07
CCP110	16p12.3	-0.411262	1.90066e-08	1.85454e-07
TADA1	1q24.1	-0.411214	1.90872e-08	1.86097e-07
UNC93B1	11q13.2	0.411209	1.90949e-08	1.86097e-07
MARCHF2	19p13.2	0.411163	1.9172e-08	1.86738e-07
ENTR1	9q34.3	0.411132	1.92222e-08	1.87118e-07
GMCL1	2p13.3	-0.410993	1.94558e-08	1.89281e-07
MYO15B	17q25.1	0.410965	1.95045e-08	1.89643e-07
RBBP8	18q11.2	-0.410919	1.95816e-08	1.90281e-07
ZBTB11	3q12.3	-0.410845	1.97076e-08	1.91395e-07
DFFA	1p36.22	0.410769	1.98393e-08	1.92561e-07
ZNF319	16q21	0.410752	1.98673e-08	1.92719e-07
EPS8L2	11p15.5	0.410745	1.98793e-08	1.92723e-07
SLTM	15q22.1	-0.410633	2.00737e-08	1.94494e-07
FAM193B	5q35.3	0.410609	2.01165e-08	1.94796e-07
SRRT	7q22.1	0.410571	2.01813e-08	1.95239e-07
KRBA1	7q36.1	0.410562	2.01976e-08	1.95239e-07
RAD1	5p13.2	-0.410562	2.01976e-08	1.95239e-07
C8ORF58	8p21.3	0.410511	2.02871e-08	1.9599e-07
VAMP7	Xq28 and Yq12	-0.4105	2.0307e-08	1.96069e-07
MZT1	13q21.33	-0.410463	2.03729e-08	1.9659e-07
TSPAN17	5q35.2	0.410416	2.04549e-08	1.97267e-07
COASY	17q21.2	0.410377	2.05244e-08	1.97823e-07
PGM2	4p14	-0.410335	2.05992e-08	1.98429e-07
ADGRG2	Xp22.13	-0.410324	2.06199e-08	1.98513e-07
NFE2L2	2q31.2	-0.410245	2.07612e-08	1.99757e-07
CRLF3	17q11.2	-0.410208	2.0828e-08	2.00284e-07
ENO3	17p13.2	0.410041	2.11312e-08	2.03082e-07
RBM27	5q32	-0.409971	2.12588e-08	2.0419e-07
PCBD2	5q31.1	-0.409939	2.13186e-08	2.04646e-07
ACTL6A	3q26.33	-0.409925	2.13442e-08	2.04774e-07
ARL2	11q13.1	0.409885	2.14171e-08	2.05355e-07
ACSF2	17q21.33	0.409804	2.1568e-08	2.06682e-07
C9ORF129	9q22.31	0.409776	2.16217e-08	2.07077e-07
MROH6	8q24.3	0.409767	2.16373e-08	2.07107e-07
GBAP1	1q22	0.409684	2.1794e-08	2.0845e-07
HAGH	16p13.3	0.409679	2.18027e-08	2.0845e-07
SREK1	5q12.3	-0.409561	2.20267e-08	2.1047e-07
AASDHPPT	11q22.3	-0.409515	2.21151e-08	2.11194e-07
SAR1B	5q31.1	-0.409434	2.22707e-08	2.12557e-07
ING3	7q31.31	-0.409406	2.23243e-08	2.12946e-07
SEC24C	10q22.2	0.409396	2.23422e-08	2.12995e-07
NCLN	19p13.3	0.409352	2.24273e-08	2.13684e-07
RAB10	2p23.3	-0.409318	2.24948e-08	2.14203e-07
SORBS3	8p21.3	0.409294	2.25399e-08	2.1451e-07
SLC9A1	1p36.11	0.409195	2.27347e-08	2.1624e-07
INTS3	1q21.3	0.409088	2.29449e-08	2.18114e-07
MVB12A	19p13.11	0.408968	2.31848e-08	2.20268e-07
BANP	16q24.2	0.408887	2.33476e-08	2.21688e-07
CHTF18	16p13.3	0.408852	2.34177e-08	2.22227e-07
NDUFAF3	3p21.31	0.408836	2.34505e-08	2.22411e-07
RNF167	17p13.2	0.408796	2.35303e-08	2.23041e-07
TRMU	22q13.31	0.40875	2.3624e-08	2.23802e-07
NAGLU	17q21.2	0.408564	2.40051e-08	2.27282e-07
BRIX1	5p13.2	-0.408518	2.41011e-08	2.28061e-07
RPL18A	19p13.11	0.408511	2.41156e-08	2.28068e-07
DLD	7q31.1	-0.408432	2.42798e-08	2.29491e-07
PPP2R5E	14q23.2	-0.408386	2.43769e-08	2.30277e-07
HNRNPA3	2q31.2	-0.408332	2.4491e-08	2.31224e-07
SCYL2	12q23.1	-0.408254	2.46558e-08	2.32647e-07
SEC23A	14q21.1	-0.408231	2.4705e-08	2.32979e-07
MZT2A	2q21.1	0.408124	2.49322e-08	2.34988e-07
EHMT1	9q34.3	0.4081	2.49844e-08	2.35347e-07
KLHDC3	6p21.1	0.408032	2.51318e-08	2.36601e-07
SAMD4B	19q13.2	0.407962	2.52831e-08	2.3789e-07
QRICH1	3p21.31	0.407902	2.54144e-08	2.3899e-07
KLHL26	19p13.11	0.407774	2.56944e-08	2.41487e-07
PDIA3P1	1q21.1	-0.407702	2.58535e-08	2.42845e-07
ICA1L	2q33.2	-0.40766	2.59464e-08	2.43498e-07
PDHB	3p14.3	-0.407656	2.59567e-08	2.43498e-07
C1QTNF6	22q12.3	0.407651	2.5967e-08	2.43498e-07
KDM4B	19p13.3	0.407542	2.62111e-08	2.45648e-07
AHDC1	1p36.11-p35.3	0.40751	2.62843e-08	2.46194e-07
SCO2	22q13.33	0.407491	2.63261e-08	2.46448e-07
MIGA1	1p31.1	-0.407445	2.64306e-08	2.47286e-07
RRNAD1	1q23.1	0.407438	2.64469e-08	2.47299e-07
GTPBP3	19p13.11	0.407392	2.65523e-08	2.48146e-07
CCDC106	19q13.42	0.407359	2.66264e-08	2.48698e-07
MUL1	1p36.12	0.407218	2.69513e-08	2.51591e-07
KRAS	12p12.1	-0.407164	2.70749e-08	2.52602e-07
COPS4	4q21.22	-0.407125	2.71665e-08	2.53173e-07
CBR4	4q32.3	-0.407125	2.71665e-08	2.53173e-07
STMN3	20q13.33	0.40709	2.72476e-08	2.53786e-07
PEX26	22q11.21	0.407037	2.73724e-08	2.54806e-07
NKAPD1	11q23.1	-0.407014	2.74269e-08	2.5517e-07
NUP43	6q25.1	-0.406999	2.74618e-08	2.55351e-07
CENPU	4q35.1	-0.406747	2.80605e-08	2.60772e-07
MIER2	19p13.3	0.406675	2.82337e-08	2.62235e-07
GEMIN2	14q21.1	-0.406499	2.86626e-08	2.6607e-07
MIIP	1p36.22	0.406478	2.87138e-08	2.66397e-07
RUNX3	1p36.11	0.406448	2.8788e-08	2.66936e-07
BRCA1	17q21.31	-0.406441	2.88051e-08	2.66945e-07
LYST	1q42.3	-0.406409	2.88852e-08	2.67538e-07
SNAPC1	14q23.2	-0.406372	2.89769e-08	2.68239e-07
ZMAT2	5q31.3	-0.406349	2.90345e-08	2.68525e-07
KLHL22	22q11.21	0.406346	2.90402e-08	2.68525e-07
KXD1	19p13.11	0.406321	2.91036e-08	2.68961e-07
YJEFN3	19p13.11	0.406258	2.92592e-08	2.70249e-07
ABCC10	6p21.1	0.406251	2.92772e-08	2.70265e-07
BRPF1	3p25.3	0.406223	2.93469e-08	2.70758e-07
PYROXD1	12p12.1	-0.40621	2.93818e-08	2.70929e-07
ANGPTL1	1q25.2	-0.406131	2.95804e-08	2.72609e-07
FURIN	15q26.1	0.406112	2.96267e-08	2.72885e-07
GPR108	19p13.3	0.406038	2.98157e-08	2.74473e-07
MAP2K4	17p12	-0.406002	2.99068e-08	2.75159e-07
LAMTOR3	4q23	-0.405931	3.00885e-08	2.76536e-07
SEC31A	4q21.22	-0.405929	3.00945e-08	2.76536e-07
CENPB	20p13	0.405925	3.01064e-08	2.76536e-07
TBCA	5q14.1	-0.405818	3.03818e-08	2.78911e-07
PTPRCAP	11q13.2	0.40573	3.06111e-08	2.80861e-07
TRIOBP	22q13.1	0.405702	3.06838e-08	2.81373e-07
MTFR1	8q13.1	-0.405649	3.08238e-08	2.825e-07
REEP4	8p21.3	0.405637	3.08543e-08	2.82624e-07
ZNF131	5p12	-0.405609	3.09276e-08	2.83039e-07
SUV39H2	10p13	-0.405607	3.09337e-08	2.83039e-07
AKAP17A	Xp22.33 and Yp11.32	0.405556	3.10686e-08	2.84016e-07
CWC22	2q31.3	-0.405554	3.10747e-08	2.84016e-07
MANBAL	20q11.23	0.405466	3.1309e-08	2.86001e-07
TMEM91	19q13.2	0.405438	3.13828e-08	2.86422e-07
FBXL14	12p13.33	0.405435	3.13896e-08	2.86422e-07
OMD	9q22.31	-0.405296	3.1764e-08	2.89679e-07
PSD	10q24.32	0.40522	3.19717e-08	2.91413e-07
B4GALT7	5q35.3	0.405155	3.2149e-08	2.92868e-07
UBE2G1	17p13.2	-0.405102	3.22954e-08	2.9404e-07
RNF34	12q24.31	-0.404847	3.30041e-08	3.00329e-07
STK35	20p13	0.404793	3.31542e-08	3.01529e-07
BAK1	6p21.31	0.404657	3.35422e-08	3.04891e-07
RAB3GAP2	1q41	-0.404638	3.35952e-08	3.05205e-07
DUSP7	3p21.2	0.404624	3.36349e-08	3.05399e-07
NPFF	12q13.13	0.404453	3.4129e-08	3.09716e-07
RPAP2	1p22.1	-0.40439	3.4311e-08	3.11198e-07
TRIP11	14q32.12	-0.404374	3.43584e-08	3.11457e-07
PREX1	20q13.13	0.404263	3.46847e-08	3.14134e-07
NDUFB5	3q26.33	-0.40426	3.46915e-08	3.14134e-07
XIAP	Xq25	-0.404128	3.5083e-08	3.17506e-07
EIF2S3	Xp22.11	-0.404091	3.51936e-08	3.18334e-07
RUSF1	16p11.2	0.404024	3.5395e-08	3.19981e-07
RINT1	7q22.3	-0.404005	3.54536e-08	3.20336e-07
ATP6V1D	14q23.3	-0.40395	3.56178e-08	3.21645e-07
TCF3	19p13.3	0.403808	3.60484e-08	3.25356e-07
POC1B	12q21.33	-0.403762	3.61904e-08	3.2646e-07
REV1	2q11.2	-0.40366	3.65047e-08	3.28939e-07
UBE2B	5q31.1	-0.40366	3.65047e-08	3.28939e-07
RHPN1	8q24.3	0.403616	3.66412e-08	3.2999e-07
PITPNB	22q12.1	-0.403577	3.67638e-08	3.30914e-07
WDR83	19p13.13	0.403542	3.68723e-08	3.31711e-07
EIF3G	19p13.2	0.403475	3.70829e-08	3.33425e-07
EIF2S2	20q11.22	-0.403438	3.71996e-08	3.34293e-07
RARG	12q13.13	0.403419	3.72581e-08	3.34457e-07
RPS6KA1	1p36.11	0.403419	3.72581e-08	3.34457e-07
UBXN1	11q12.3	0.403394	3.73387e-08	3.34999e-07
THADA	2p21	-0.403384	3.7368e-08	3.35081e-07
IGHMBP2	11q13.3	0.403377	3.739e-08	3.35098e-07
UBE2J2	1p36.33	0.403292	3.76626e-08	3.37358e-07
C2ORF81	2p13.1	0.403234	3.78471e-08	3.38785e-07
RPL13	16q24.3	0.403229	3.78627e-08	3.38785e-07
SNHG7	9q34.3	0.403204	3.79445e-08	3.39334e-07
MTRES1	6q21	-0.403154	3.81041e-08	3.40579e-07
DECR2	16p13.3	0.403098	3.82839e-08	3.42002e-07
AP5M1	14q22.3	-0.403011	3.85665e-08	3.44341e-07
UFM1	13q13.3	-0.402982	3.86612e-08	3.45001e-07
STK38L	12p11.23	-0.402958	3.87416e-08	3.45533e-07
RPAP1	15q15.1	0.402949	3.8772e-08	3.45618e-07
OCLM	1q31.1	-0.402905	3.89167e-08	3.4635e-07
GBE1	3p12.2	-0.402905	3.89167e-08	3.4635e-07
KATNBL1P6	6q24.3	-0.402905	3.89167e-08	3.4635e-07
TAP1	6p21.32	0.402891	3.89625e-08	3.46572e-07
SOS2	14q21.3	-0.402881	3.8993e-08	3.46658e-07
TMEM63B	6p21.1	0.402863	3.90542e-08	3.47016e-07
CACYBP	1q25.1	-0.402823	3.91846e-08	3.47988e-07
VARS1	6p21.33	0.402812	3.9223e-08	3.48143e-07
FLNA	Xq28	0.402724	3.95161e-08	3.50558e-07
SNX14	6q14.3	-0.402696	3.96091e-08	3.51195e-07
PPP5C	19q13.32	0.402673	3.9686e-08	3.51689e-07
RBM41	Xq22.3	-0.402636	3.98113e-08	3.52611e-07
SELENOI	2p23.3	-0.402466	4.03844e-08	3.57497e-07
DGCR6L	22q11.21	0.402457	4.04153e-08	3.57579e-07
NOC2L	1p36.33	0.402397	4.06222e-08	3.59219e-07
SLC50A1	1q22	0.402374	4.07018e-08	3.59731e-07
TCTA	3p21.31	0.402304	4.09414e-08	3.61656e-07
MARK2	11q13.1	0.40229	4.09895e-08	3.61889e-07
ZNF700	19p13.2	-0.402244	4.11502e-08	3.63114e-07
SLC25A46	5q22.1	-0.402219	4.12388e-08	3.63703e-07
NAA40	11q13.1	0.402133	4.15383e-08	3.6615e-07
TMEM143	19q13.32	0.402019	4.19381e-08	3.69478e-07
CHST7	Xp11.3	0.401998	4.20119e-08	3.69932e-07
MKLN1	7q32.3	-0.401954	4.21682e-08	3.71111e-07
CBX1	17q21.32	-0.401908	4.23333e-08	3.72367e-07
MICU2	13q12.11	-0.401869	4.24741e-08	3.73408e-07
C10ORF95	10q24.32	0.401808	4.26904e-08	3.75111e-07
TRPT1	11q13.1	0.401768	4.28357e-08	3.76188e-07
TBL1XR1	3q26.32	-0.401681	4.31513e-08	3.7876e-07
DPM3	1q22	0.401577	4.3532e-08	3.819e-07
ZNF33A	10p11.1	-0.401535	4.36852e-08	3.83041e-07
MCM5	22q12.3	0.401451	4.39932e-08	3.85538e-07
ETFB	19q13.41	0.401379	4.426e-08	3.87672e-07
FUT7	9q34.3	0.40134	4.4407e-08	3.88754e-07
SNRNP27	2p13.3	-0.401326	4.4459e-08	3.89004e-07
CD7	17q25.3	0.401171	4.50435e-08	3.93911e-07
MMS22L	6q16.1	-0.401163	4.50733e-08	3.93965e-07
TAF9B	Xq21.1	-0.401155	4.5105e-08	3.94034e-07
PPP2CA	5q31.1	-0.401104	4.52988e-08	3.95519e-07
UTP18	17q21.33	-0.401057	4.54756e-08	3.96854e-07
COG5	7q22.3	-0.401043	4.55288e-08	3.9711e-07
SSB	2q31.1	-0.401023	4.56087e-08	3.97598e-07
ASNSD1	2q32.2	-0.400916	4.60192e-08	4.00756e-07
CORO1A	16p11.2	0.400916	4.60192e-08	4.00756e-07
NHLRC3	13q13.3	-0.400907	4.60551e-08	4.00858e-07
TLN1	9p13.3	0.400879	4.61628e-08	4.01585e-07
C20ORF27	20p13	0.400816	4.64061e-08	4.0335e-07
BCL10	1p22.3	-0.400814	4.64142e-08	4.0335e-07
PLEC	8q24.3	0.400805	4.64513e-08	4.03461e-07
PRH2	12p13.2	-0.400784	4.65328e-08	4.03957e-07
KIAA2026	9p24.1	-0.400737	4.67143e-08	4.05321e-07
WAPL	10q23.2	-0.400689	4.69056e-08	4.06768e-07
PCGF6	10q24.33	-0.400666	4.69969e-08	4.07348e-07
ARPP19	15q21.2	-0.400469	4.77804e-08	4.13893e-07
GNPAT	1q42.2	-0.400459	4.78176e-08	4.13893e-07
ARHGEF2	1q22	0.400457	4.78269e-08	4.13893e-07
DCUN1D1	3q26.33	-0.400396	4.8073e-08	4.15807e-07
SRP19	5q22.2	-0.400378	4.81441e-08	4.16205e-07
ZNF720	16p11.2	-0.400353	4.82472e-08	4.16879e-07
MRPL28	16p13.3	0.400327	4.83504e-08	4.17554e-07
TFPT	19q13.42	0.40016	4.90316e-08	4.23216e-07
PSMB8	6p21.32	0.400058	4.94524e-08	4.26627e-07
ABRAXAS2	10q26.13	-0.400012	4.96449e-08	4.28065e-07
BABAM1	19p13.11	0.399994	4.9722e-08	4.28507e-07
TEFM	17q11.2	-0.399961	4.98574e-08	4.29451e-07
ATG5	6q21	-0.399926	5.00027e-08	4.3048e-07
NME4	16p13.3	0.399892	5.01485e-08	4.31511e-07
RPL10	Xq28	0.399845	5.03436e-08	4.32965e-07
THBS2	6q27	-0.399828	5.04159e-08	4.33189e-07
OSBPL8	12q21.2	-0.399827	5.04218e-08	4.33189e-07
VPS26B	11q25	0.399803	5.05197e-08	4.33806e-07
ZMAT5	22q12.2	0.399743	5.07752e-08	4.35774e-07
FAM177A1	14q13.2	-0.39962	5.12998e-08	4.39908e-07
L3MBTL2	22q13.2	0.399618	5.13098e-08	4.39908e-07
RRP9	3p21.2	0.399611	5.13396e-08	4.39937e-07
ITPK1	14q32.12	0.399565	5.15391e-08	4.41418e-07
RAB35	12q24.23	0.399467	5.19604e-08	4.44797e-07
PRKAR1A	17q24.2	-0.399354	5.24561e-08	4.48809e-07
TAF10	11p15.4	0.399226	5.3018e-08	4.53383e-07
GNE	9p13.3	-0.399208	5.31002e-08	4.53852e-07
ENKD1	16q22.1	0.399034	5.38768e-08	4.60253e-07
SNRPB2	20p12.1	-0.398967	5.418e-08	4.62605e-07
SPATC1	8q24.3	0.398909	5.44427e-08	4.6461e-07
SEC24A	5q31.1	-0.398844	5.47384e-08	4.66893e-07
SLC34A3	9q34.3	0.398836	5.47765e-08	4.66955e-07
ZNF837	19q13.43	0.39883	5.48019e-08	4.66955e-07
MAPRE1	20q11.21	-0.398788	5.4993e-08	4.68343e-07
NIPSNAP3A	9q31.1	-0.398735	5.52381e-08	4.70189e-07
CDC42BPG	11q13.1	0.398661	5.55809e-08	4.72865e-07
UBE2D3	4q24	-0.398652	5.56239e-08	4.72988e-07
RBM43	2q23.3	-0.398508	5.62944e-08	4.78444e-07
FASN	17q25.3	0.398408	5.67639e-08	4.82188e-07
PFDN4	20q13.2	-0.398387	5.68627e-08	4.8278e-07
LSM7	19p13.3	0.398269	5.74254e-08	4.87309e-07
OPRL1	20q13.33	0.398207	5.77255e-08	4.89605e-07
CCDC90B	11q14.1	-0.398176	5.78705e-08	4.90486e-07
ATG9B	7q36.1	0.398173	5.78884e-08	4.90486e-07
COMMD5	8q24.3	0.398132	5.8083e-08	4.91884e-07
BRD9	5p15.33	0.398014	5.86574e-08	4.96495e-07
RUSC2	9p13.3	0.397966	5.88954e-08	4.98256e-07
DCAF10	9p13.2	-0.39791	5.91686e-08	5.00312e-07
SYF2	1p36.11	-0.397769	5.98685e-08	5.05973e-07
ADORA2A	22q11.23	0.397755	5.99378e-08	5.06301e-07
POMGNT1	1p34.1	0.397724	6.00881e-08	5.06833e-07
ARHGDIA	17q25.3	0.397718	6.01229e-08	5.06833e-07
STOML1	15q24.1	0.397718	6.01229e-08	5.06833e-07
POLR2B	4q12	-0.397718	6.01229e-08	5.06833e-07
NECTIN2	19q13.32	0.397701	6.0204e-08	5.0726e-07
ARSA	22q13.33	0.397685	6.02853e-08	5.07468e-07
SF3B4	1q21.2	0.397684	6.029e-08	5.07468e-07
CCDC82	11q21	-0.397616	6.06347e-08	5.10112e-07
NEK7	1q31.3	-0.397166	6.29419e-08	5.29253e-07
ACADS	12q24.31	0.397013	6.37458e-08	5.35742e-07
ICAM2	17q23.3	0.396967	6.39913e-08	5.37534e-07
CUL9	6p21.1	0.396943	6.41145e-08	5.38296e-07
SENP3	17p13	0.396881	6.4448e-08	5.40823e-07
CMTM6	3p22.3	-0.39686	6.45596e-08	5.41485e-07
NRBP2	8q24.3	0.396719	6.53206e-08	5.47592e-07
PRRT3	3p25.3	0.396705	6.53959e-08	5.47946e-07
CCT6A	7p11.2	-0.396647	6.57106e-08	5.50306e-07
SLC6A16	19q13.33	0.396522	6.63954e-08	5.5576e-07
TNFRSF14	1p36.32	0.396459	6.67403e-08	5.58366e-07
PTP4A3	8q24.3	0.396436	6.68685e-08	5.59157e-07
CCDC12	3p21.31	0.396429	6.6907e-08	5.59197e-07
TMEM185A	Xq28	0.396373	6.72158e-08	5.61496e-07
SNHG11	20q11.23	0.396294	6.76556e-08	5.64885e-07
ZNF646	16p11.2	0.39622	6.80721e-08	5.68077e-07
KHNYN	14q12	0.396111	6.86882e-08	5.72931e-07
ZBTB46	20q13.33	0.396019	6.92168e-08	5.7705e-07
DXO	6p21.33	0.395933	6.97092e-08	5.80795e-07
TDG	12q23.3	-0.395928	6.9736e-08	5.80795e-07
KIR2DL3	19q13.42	0.39591	6.98424e-08	5.8139e-07
PDXP	22q13.1	0.395736	7.08533e-08	5.89509e-07
ASPN	9q22.31	-0.395661	7.12941e-08	5.9288e-07
EXOC6	10q23.33	-0.395646	7.13842e-08	5.93332e-07
[truncated: 14,609 more rows]

## Sheet: Supplementary Table 2
Supplementary Table 2. KEGG enriched pathways of PARP10 positively co-expressed genes (r > 0.5, P < 0.05).
Term	Overlap	Adjusted P-value	Old P-value	Old Adjusted P-value	Odds Ratio	Combined Score	Genes
Yersinia infection	14/137	0.00603329	0	0	4.04212	42.0976	MAP2K2;TRAF2;TICAM1;VAV1;RELA;IRAK1;IRF3;AKT2;ARHGEF1;PIP5K1C;TAB1;IKBKG;PKN1;MAP2K7
Hepatitis B	15/162	0.00603329	0	0	3.62593	35.8892	MAP2K2;TGFB1;ATF6B;BAD;ARAF;TYK2;TICAM1;RELA;IRAK1;IRF3;AKT2;IRF7;TAB1;IKBKG;MAP2K7
RIG-I-like receptor signaling pathway	9/70	0.0109884	0	0	5.20855	46.3193	OTUD5;IRF3;TRADD;DHX58;IRF7;PIN1;TRAF2;IKBKG;RELA
Salmonella infection	18/249	0.0115412	0	0	2.77215	23.1902	GSDMD;MAP2K2;DCTN1;FHOD1;TRADD;TRAF2;RELA;DNM2;MYL5;KLC4;ACTR1B;IRAK1;AKT2;PLEKHM2;IKBKG;PKN1;TAB1;MAP2K7
MAPK signaling pathway	20/294	0.0115412	0	0	2.6006	21.6709	MAP4K1;MAP4K2;MAP2K2;TGFB1;TRADD;SRF;ARAF;TRAF2;RASGRP2;MAPK8IP3;RELA;IRAK1;AKT2;TAOK2;MKNK2;IKBKG;TAB1;MAP2K7;MAP3K14;MAP3K11
Hepatitis C	13/157	0.0188385	0	0	3.19666	24.4888	MAP2K2;BAD;TRADD;ARAF;TRAF2;TYK2;TICAM1;RELA;IRF3;PPP2R1A;AKT2;IRF7;IKBKG
Toll-like receptor signaling pathway	10/104	0.0225271	0	0	3.75602	27.5232	MAP2K2;IRAK1;IRF3;AKT2;IRF7;TAB1;IKBKG;TICAM1;MAP2K7;RELA
Lipid and atherosclerosis	15/215	0.0271693	0	0	2.65773	18.1523	BAD;MIB2;TRAF2;TICAM1;VAV1;RELA;RXRB;IRAK1;IRF3;AKT2;IRF7;ARHGEF1;IKBKG;TAB1;MAP2K7
TNF signaling pathway	10/112	0.0271693	0	0	3.46	23.3602	ATF6B;AKT2;TRADD;BCL3;TRAF2;TAB1;IKBKG;MAP2K7;MAP3K14;RELA
Chronic myeloid leukemia	8/76	0.0271693	0	0	4.14417	27.7179	MAP2K2;TGFB1;CTBP1;BAD;AKT2;ARAF;IKBKG;RELA
Pancreatic cancer	8/76	0.0271693	0	0	4.14417	27.7179	TGFB1;BAD;AKT2;RPS6KB2;ARAF;IKBKG;RALGDS;RELA
Autophagy	11/137	0.0300875	0	0	3.08285	19.8203	STK11;MAP2K2;BAD;AKT2;DAPK3;AKT1S1;RPS6KB2;ATG2A;TSC2;ATG4B;ATG4D
Epstein-Barr virus infection	14/202	0.0300875	0	0	2.63568	16.8621	TRADD;TRAF2;TYK2;RELA;TAPBP;NCOR2;IRAK1;IRF3;AKT2;IRF7;IKBKG;TAB1;MAP2K7;MAP3K14
NOD-like receptor signaling pathway	13/181	0.0300875	0	0	2.73659	17.3643	GSDMD;RNF31;TRAF2;TYK2;TICAM1;RELA;SHARPIN;IRF3;IRF7;RBCK1;TAB1;IKBKG;PKN1
AMPK signaling pathway	10/120	0.0314968	0	0	3.20703	19.9813	SREBF1;CRTC2;STK11;PFKL;PPP2R1A;AKT2;AKT1S1;RPS6KB2;TSC2;RAB11B
NF-kappa B signaling pathway	9/104	0.0328977	0	0	3.33857	19.9755	PIDD1;IRAK1;TRADD;TRAF2;TAB1;IKBKG;TICAM1;MAP3K14;RELA
Human papillomavirus infection	19/331	0.0328977	0	0	2.16135	12.9225	MAP2K2;BAD;TRADD;AXIN1;TSC2;SCRIB;TYK2;RFNG;TICAM1;RELA;IRF3;PPP2R1A;AKT2;MFNG;DVL1;RPS6KB2;DVL2;IKBKG;LLGL1
Acute myeloid leukemia	7/67	0.0328977	0	0	4.10387	24.438	MAP2K2;BAD;AKT2;RPS6KB2;ARAF;IKBKG;RELA
Human immunodeficiency virus 1 infection	14/212	0.0328977	0	0	2.50126	14.8839	MAP2K2;BAD;TRADD;TRAF2;RELA;TAPBP;IRAK1;AP1G2;IRF3;AKT2;RPS6KB2;IKBKG;TAB1;MAP2K7
Colorectal cancer	8/86	0.03302	0	0	3.611	21.2888	MAP2K2;TGFB1;BAD;AKT2;RPS6KB2;ARAF;AXIN1;RALGDS
Adipocytokine signaling pathway	7/69	0.0350576	0	0	3.97108	22.9802	RXRB;STK11;TRADD;AKT2;TRAF2;IKBKG;RELA
Shigellosis	15/246	0.0419287	0	0	2.29736	12.6999	RNF31;GSK3A;TRADD;TRAF2;RELA;MYL5;SHARPIN;IRF3;AKT2;AKT1S1;RPS6KB2;RBCK1;IKBKG;TAB1;TECPR1
mTOR signaling pathway	11/154	0.0419287	0	0	2.71396	14.9728	STK11;MAP2K2;AKT2;NPRL3;DVL1;AKT1S1;RPS6KB2;DVL2;TSC2;WDR24;TELO2
Non-alcoholic fatty liver disease	11/155	0.0421957	0	0	2.69498	14.7362	SREBF1;GSK3A;TGFB1;NDUFS8;NDUFS7;AKT2;TRAF2;CYC1;NDUFV1;MAP3K11;RELA
Viral carcinogenesis	13/203	0.0453307	0	0	2.41696	12.9441	HDAC5;HDAC10;ATF6B;BAD;TRADD;SRF;SCRIB;TRAF2;RELA;HDAC7;IRF3;IRF7;IKBKG
Endocytosis	15/252	0.0457547	0	0	2.2385	11.8797	SH3GLB2;VPS4A;AGAP2;EPN1;RAB11B;DNM2;ACAP3;GRK2;HGS;PSD4;CHMP1A;GRK6;PIP5K1C;VPS28;SH3GL1
Notch signaling pathway	6/59	0.0525909	0	0	3.97642	20.3991	NCOR2;CTBP1;MFNG;DVL1;DVL2;RFNG
Osteoclast differentiation	9/127	0.0797088	0	0	2.68463	12.5582	TGFB1;AKT2;TRAF2;TAB1;IKBKG;TYK2;MAP2K7;MAP3K14;RELA
Toxoplasmosis	8/112	0.109357	0	0	2.70462	11.7015	TGFB1;IRAK1;BAD;AKT2;TAB1;IKBKG;TYK2;RELA
Necroptosis	10/159	0.11135	0	0	2.36283	10.1	RNF31;SHARPIN;USP21;TRADD;CHMP1A;VPS4A;TRAF2;RBCK1;TYK2;TICAM1
Pathways of neurodegeneration	22/475	0.113061	0	0	1.72053	7.27178	MAP2K2;UBA7;DCTN1;BAD;ARAF;AXIN1;TRAF2;ATP5F1D;RELA;ATXN2L;KLC4;ACTR1B;NDUFS8;NDUFS7;DVL1;ATG2A;DVL2;MAP3K10;UBA1;CYC1;MAP2K7;NDUFV1
Measles	9/139	0.120713	0	0	2.43531	10.056	IRAK1;IRF3;BAD;AKT2;TRADD;IRF7;IKBKG;TYK2;RELA
Fanconi anemia pathway	5/54	0.122305	0	0	3.57844	14.5634	MUS81;TOP3B;EME2;ERCC1;TELO2
Apoptosis	9/142	0.122305	0	0	2.38001	9.52845	PIDD1;MAP2K2;BAD;AKT2;TRADD;TRAF2;IKBKG;MAP3K14;RELA
Fc gamma R-mediated phagocytosis	7/97	0.122305	0	0	2.73168	10.8481	SPHK2;AKT2;RPS6KB2;PIP5K1C;PLA2G6;VAV1;DNM2
Sulfur relay system	2022-02-08	0.122305	0	0	11.6523	45.903	CTU1;URM1
Choline metabolism in cancer	7/98	0.122305	0	0	2.70152	10.5915	MAP2K2;AKT2;DGKQ;RPS6KB2;TSC2;PIP5K1C;RALGDS
Kaposi sarcoma-associated herpesvirus infection	11/193	0.122305	0	0	2.12809	8.33535	MAP2K2;IRF3;AKT2;TRADD;IRF7;TRAF2;IKBKG;TYK2;TICAM1;MAP2K7;RELA
Thyroid hormone signaling pathway	8/121	0.122305	0	0	2.48805	9.71077	RXRB;PFKL;MAP2K2;MED24;BAD;AKT2;TSC2;MED16
Human T-cell leukemia virus 1 infection	12/219	0.122305	0	0	2.04226	7.9505	CRTC2;RANBP3;MAP2K2;TGFB1;ATF6B;CRTC1;AKT2;SRF;IKBKG;MAP3K14;RELA;ANAPC2
Endometrial cancer	5/58	0.125081	0	0	3.30769	12.5322	MAP2K2;BAD;AKT2;ARAF;AXIN1
Influenza A	10/172	0.125081	0	0	2.17176	8.2132	MAP2K2;IRF3;AKT2;TRADD;IRF7;IKBKG;TYK2;TICAM1;RELA;RAB11B
Phospholipase D signaling pathway	9/148	0.125081	0	0	2.27657	8.57005	MAP2K2;SPHK2;AKT2;DGKQ;TSC2;PIP5K1C;AGPAT1;RALGDS;DNM2
Gastric cancer	9/149	0.125081	0	0	2.26019	8.42177	RXRB;MAP2K2;TGFB1;AKT2;DVL1;RPS6KB2;ARAF;DVL2;AXIN1
Chagas disease	7/102	0.125081	0	0	2.58724	9.63838	TGFB1;IRAK1;PPP2R1A;AKT2;IKBKG;TICAM1;RELA
Longevity regulating pathway	7/102	0.125081	0	0	2.58724	9.63838	STK11;ATF6B;AKT2;AKT1S1;RPS6KB2;TSC2;RELA
Human cytomegalovirus infection	12/225	0.125081	0	0	1.98411	7.3564	MAP2K2;IRF3;ATF6B;AKT2;TRADD;RPS6KB2;TSC2;ARHGEF1;TRAF2;IKBKG;RELA;TAPBP
Spliceosome	9/150	0.125081	0	0	2.24404	8.27654	SART1;XAB2;SF3A2;PUF60;SNRNP70;U2AF2;DHX38;DHX16;PRPF31
T cell receptor signaling pathway	7/104	0.129613	0	0	2.53363	9.20221	MAP2K2;AKT2;IKBKG;MAP2K7;MAP3K14;VAV1;RELA
Alzheimer disease	17/369	0.143275	0	0	1.70418	5.93805	MAP2K2;BAD;ARAF;AXIN1;TRAF2;ATP5F1D;RELA;KLC4;NDUFS8;NDUFS7;AKT2;DVL1;ATG2A;DVL2;CYC1;MAP2K7;NDUFV1
Cytosolic DNA-sensing pathway	5/63	0.143275	0	0	3.02176	10.4941	IRF3;IRF7;POLR2E;IKBKG;RELA
ErbB signaling pathway	6/85	0.143275	0	0	2.66414	9.21081	MAP2K2;BAD;AKT2;RPS6KB2;ARAF;MAP2K7
Insulin resistance	7/108	0.143275	0	0	2.43279	8.40124	PTPA;SREBF1;CRTC2;AKT2;NR1H2;RPS6KB2;RELA
PD-L1 expression and PD-1 checkpoint pathway in cancer	6/89	0.167528	0	0	2.53523	8.27626	MAP2K2;AKT2;RPS6KB2;IKBKG;TICAM1;RELA
Insulin signaling pathway	8/137	0.167528	0	0	2.17765	7.09893	SREBF1;MAP2K2;BAD;AKT2;MKNK2;RPS6KB2;ARAF;TSC2
Renal cell carcinoma	5/69	0.183859	0	0	2.73762	8.58819	MAP2K2;TGFB1;BAD;AKT2;ARAF
Small cell lung cancer	6/92	0.183859	0	0	2.44641	7.6529	RXRB;ZBTB17;AKT2;TRAF2;IKBKG;RELA
Amino sugar and nucleotide sugar metabolism	4/48	0.183859	0	0	3.18313	9.91157	CYB5R3;FCSK;AMDHD2;RENBP
Hepatocellular carcinoma	9/168	0.188598	0	0	1.98814	6.10607	MAP2K2;TGFB1;BAD;AKT2;DVL1;RPS6KB2;ARAF;DVL2;AXIN1
Neurotrophin signaling pathway	7/119	0.193721	0	0	2.1926	6.60216	MAP2K2;IRAK1;BAD;AKT2;MAP2K7;RELA;SH2B1
Sphingolipid signaling pathway	7/119	0.193721	0	0	2.1926	6.60216	MAP2K2;PPP2R1A;SPHK2;AKT2;TRADD;TRAF2;RELA
Non-small cell lung cancer	5/72	0.195732	0	0	2.61464	7.80342	RXRB;MAP2K2;BAD;AKT2;ARAF
Prostate cancer	6/97	0.206384	0	0	2.3114	6.73892	MAP2K2;BAD;AKT2;ARAF;IKBKG;RELA
Glycerophospholipid metabolism	6/98	0.211559	0	0	2.28615	6.5727	LYPLA2;DGKQ;PNPLA6;PLA2G6;AGPAT1;CDIPT
B cell receptor signaling pathway	5/81	0.28035	0	0	2.30394	5.93949	MAP2K2;AKT2;IKBKG;VAV1;RELA
VEGF signaling pathway	4/59	0.299053	0	0	2.54506	6.35786	MAP2K2;SPHK2;BAD;AKT2
HIF-1 signaling pathway	6/109	0.303339	0	0	2.04084	5.03853	PFKL;MAP2K2;AKT2;MKNK2;RPS6KB2;RELA
Huntington disease	13/306	0.312556	0	0	1.55893	3.77899	DCTN1;TRAF2;ATP5F1D;KLC4;ACTR1B;NDUFS8;NDUFS7;ATG2A;POLR2E;MAP3K10;CYC1;MAP2K7;NDUFV1
Chemokine signaling pathway	9/192	0.312718	0	0	1.72525	4.15611	GSK3A;GRK2;BAD;AKT2;GRK6;IKBKG;RASGRP2;VAV1;RELA
Ubiquitin mediated proteolysis	7/140	0.334034	0	0	1.8444	4.29497	FZR1;CDC34;UBA7;MGRN1;SYVN1;UBA1;ANAPC2
Bladder cancer	3/41	0.352774	0	0	2.76017	6.19907	MAP2K2;DAPK3;ARAF
Homologous recombination	3/41	0.352774	0	0	2.76017	6.19907	MUS81;TOP3B;XRCC3
Diabetic cardiomyopathy	9/203	0.376173	0	0	1.6265	3.50471	PTPA;TGFB1;NDUFS8;NDUFS7;AKT2;CYC1;ATP5F1D;NDUFV1;RELA
Ras signaling pathway	10/232	0.376173	0	0	1.57986	3.40347	MAP2K2;BAD;AKT2;IKBKG;PLA2G6;RASAL3;RASGRP2;RALGDS;RGL2;RELA
Breast cancer	7/147	0.376844	0	0	1.75154	3.74668	MAP2K2;AKT2;DVL1;RPS6KB2;ARAF;DVL2;AXIN1
Fc epsilon RI signaling pathway	4/68	0.384629	0	0	2.18615	4.60267	MAP2K2;AKT2;MAP2K7;VAV1
Terpenoid backbone biosynthesis	2022-02-22	0.388132	0	0	3.49317	7.27712	MVD;RCE1
Central carbon metabolism in cancer	4/70	0.399574	0	0	2.11968	4.29987	PFKL;MAP2K2;AKT2;SIRT6
Epithelial cell signaling in Helicobacter pylori infection	4/70	0.399574	0	0	2.11968	4.29987	CSK;IKBKG;MAP3K14;RELA
Phosphatidylinositol signaling system	5/97	0.404381	0	0	1.90168	3.81099	DGKQ;INPP5E;PIP5K1C;PI4KB;CDIPT
mRNA surveillance pathway	5/98	0.411875	0	0	1.88114	3.71191	UPF1;CPSF1;PPP2R1A;SYMPK;SMG5
Melanoma	4/72	0.411924	0	0	2.05712	4.02171	MAP2K2;BAD;AKT2;ARAF
Cushing syndrome	7/155	0.411924	0	0	1.65618	3.21566	MAP2K2;ATF6B;DVL1;AIP;DVL2;AXIN1;MEN1
Inositol phosphate metabolism	4/73	0.411924	0	0	2.02721	3.89108	INPP5E;PIP5K1C;PI4KB;CDIPT
Cellular senescence	7/156	0.411924	0	0	1.64498	3.1555	MAP2K2;TGFB1;AKT2;TSC2;E2F4;RELA;RAD9A
Progesterone-mediated oocyte maturation	5/100	0.411924	0	0	1.84134	3.52287	STK10;FZR1;AKT2;ARAF;ANAPC2
Relaxin signaling pathway	6/129	0.420323	0	0	1.70723	3.21209	MAP2K2;TGFB1;ATF6B;AKT2;MAP2K7;RELA
FoxO signaling pathway	6/131	0.433319	0	0	1.67974	3.07634	STK11;MAP2K2;TGFB1;AKT2;ARAF;AGAP2
Pathways in cancer	19/531	0.433319	0	0	1.3033	2.37485	ZBTB17;MAP2K2;TGFB1;CTBP1;BAD;DAPK3;ARAF;AXIN1;TRAF2;RASGRP2;RELA;RXRB;AKT2;DVL1;RPS6KB2;DVL2;ARHGEF1;IKBKG;RALGDS
Pertussis	4/76	0.433319	0	0	1.94244	3.52963	IRF3;IRAK1;TICAM1;RELA
C-type lectin receptor signaling pathway	5/104	0.436362	0	0	1.76658	3.17819	AKT2;BCL3;IKBKG;MAP3K14;RELA
Leishmaniasis	4/77	0.437987	0	0	1.91573	3.41846	TGFB1;IRAK1;TAB1;RELA
Hippo signaling pathway	7/163	0.442886	0	0	1.57059	2.76814	TGFB1;PPP2R1A;DVL1;DVL2;AXIN1;SCRIB;LLGL1
RNA degradation	4/79	0.453153	0	0	1.86445	3.20878	EDC4;PFKL;CNOT3;SKIV2L
Th17 cell differentiation	5/107	0.453153	0	0	1.71436	2.94576	RXRB;TGFB1;IKBKG;TYK2;RELA
Apelin signaling pathway	6/137	0.461559	0	0	1.60231	2.707	BORCS8-MEF2B;HDAC5;MAP2K2;SPHK2;AKT2;RPS6KB2
PI3K-Akt signaling pathway	13/354	0.475534	0	0	1.33613	2.20282	CRTC2;MAP2K2;ATF6B;BAD;TSC2;RELA;STK11;PPP2R1A;AKT2;CDC37;RPS6KB2;IKBKG;PKN1
Tight junction	7/169	0.475534	0	0	1.51195	2.47807	STK11;PPP2R1A;SYMPK;SCRIB;MAP2K7;LLGL1;TJAP1
Thermogenesis	9/232	0.48279	0	0	1.41285	2.26299	NDUFS8;NDUFS7;AKT1S1;RPS6KB2;TSC2;SIRT6;CYC1;ATP5F1D;NDUFV1
Protein processing in endoplasmic reticulum	7/171	0.48279	0	0	1.49336	2.389	DNAJB2;ATF6B;SYVN1;RAD23A;TRAF2;MAP2K7;UBXN6
Hedgehog signaling pathway	3/56	0.48279	0	0	1.97746	3.13198	GRK2;MGRN1;CSNK1G2
Pyrimidine metabolism	3/56	0.48279	0	0	1.97746	3.13198	UCK1;ENTPD6;UCKL1
Proteoglycans in cancer	8/205	0.501236	0	0	1.42095	2.18342	MAP2K2;TGFB1;AKT2;RPS6KB2;ARAF;ARHGEF1;PPP1R12C;VAV1
Rap1 signaling pathway	8/210	0.531228	0	0	1.38542	2.01331	MAP2K2;RGS14;AKT2;PRKD2;RASGRP2;RALGDS;VAV1;SIPA1
Long-term depression	3/60	0.531228	0	0	1.83831	2.66574	MAP2K2;PPP2R1A;ARAF
Fructose and mannose metabolism	2/33	0.531228	0	0	2.25238	3.26542	PFKL;FCSK
Tuberculosis	7/180	0.534521	0	0	1.41501	2.0294	TGFB1;IRAK1;SPHK2;BAD;AKT2;TRADD;RELA
Glycerolipid metabolism	3/61	0.537782	0	0	1.80652	2.56311	DGAT1;DGKQ;AGPAT1
Nicotinate and nicotinamide metabolism	2/35	0.555728	0	0	2.11565	2.88745	SIRT6;SIRT2
Basal cell carcinoma	3/63	0.555728	0	0	1.74613	2.37226	DVL1;AXIN1;DVL2
Lysine degradation	3/63	0.555728	0	0	1.74613	2.37226	DOT1L;KMT2B;SETD1A
Cell cycle	5/124	0.563202	0	0	1.46816	1.9489	ZBTB17;FZR1;TGFB1;E2F4;ANAPC2
IL-17 signaling pathway	4/94	0.563202	0	0	1.55251	2.04707	TRADD;TRAF2;IKBKG;RELA
TGF-beta signaling pathway	4/94	0.563202	0	0	1.55251	2.04707	TGFB1;PPP2R1A;RPS6KB2;E2F4
Thyroid cancer	2/37	0.572245	0	0	1.99455	2.56576	RXRB;MAP2K2
Neutrophil extracellular trap formation	7/189	0.572245	0	0	1.34441	1.72788	GSDMD;HDAC5;MAP2K2;HDAC10;AKT2;RELA;HDAC7
Transcriptional misregulation in cancer	7/192	0.594228	0	0	1.3224	1.6384	CDK9;RXRB;ZBTB17;DOT1L;ASPSCR1;RELA;MEN1
Mitophagy	3/68	0.599132	0	0	1.61139	1.9669	RHOT2;TBC1D17;RELA
Various types of N-glycan biosynthesis	2/39	0.599132	0	0	1.88654	2.28987	HEXD;ALG12
Dopaminergic synapse	5/132	0.60229	0	0	1.37511	1.61783	GSK3A;ATF6B;PPP2R1A;AKT2;DRD4
Prolactin signaling pathway	3/70	0.60229	0	0	1.56313	1.82886	MAP2K2;AKT2;RELA
Pathogenic Escherichia coli infection	7/197	0.60229	0	0	1.28727	1.50008	IRAK1;TRADD;ARHGEF1;TRAF2;IKBKG;TAB1;RELA
Oxidative phosphorylation	5/133	0.60229	0	0	1.36429	1.58109	NDUFS8;NDUFS7;CYC1;NDUFV1;ATP5F1D
Vascular smooth muscle contraction	5/133	0.60229	0	0	1.36429	1.58109	MAP2K2;ARAF;ARHGEF1;PLA2G6;PPP1R12C
Herpes simplex virus 1 infection	16/498	0.60229	0	0	1.16121	1.33323	BAD;TRADD;TSC2;TRAF2;TYK2;TICAM1;RELA;TAPBP;ZNF707;IRAK1;IRF3;AKT2;IRF7;ZNF777;IKBKG;TAB1
Wnt signaling pathway	6/166	0.60229	0	0	1.30992	1.49892	PORCN;CTBP1;DVL1;DVL2;AXIN1;PRICKLE3
Amyotrophic lateral sclerosis	12/364	0.60229	0	0	1.19193	1.36294	ATXN2L;KLC4;ACTR1B;NDUFS8;NDUFS7;DCTN1;BAD;ATG2A;TRAF2;CYC1;ATP5F1D;NDUFV1
cGMP-PKG signaling pathway	6/167	0.606316	0	0	1.30171	1.46959	BORCS8-MEF2B;MAP2K2;ATF6B;BAD;AKT2;SRF
Fat digestion and absorption	2/43	0.628527	0	0	1.70214	1.84462	DGAT1;AGPAT1
Parathyroid hormone synthesis, secretion and action	4/106	0.628527	0	0	1.36901	1.46476	RXRB;ATF6B;ARAF;ARHGEF1
Thiamine metabolism	2022-01-15	0.628527	0	0	2.49141	2.6444	AK1
Vasopressin-regulated water reabsorption	2/44	0.628527	0	0	1.66153	1.75121	DCTN1;RAB11B
Glioma	3/75	0.628527	0	0	1.4542	1.53201	MAP2K2;AKT2;ARAF
Chemical carcinogenesis	8/239	0.628527	0	0	1.20967	1.26673	RXRB;MAP2K2;ATF6B;BAD;AKT2;RPS6KB2;AIP;RELA
Glycosphingolipid biosynthesis	2/45	0.637702	0	0	1.6228	1.66378	ST6GALNAC4;ST6GALNAC6
Signaling pathways regulating pluripotency of stem cells	5/143	0.646563	0	0	1.26477	1.26065	MAP2K2;AKT2;DVL1;DVL2;AXIN1
Spinocerebellar ataxia	5/143	0.646563	0	0	1.26477	1.26065	ATXN2L;AKT2;ATG2A;TRAF2;CIC
Nucleotide excision repair	2/47	0.654115	0	0	1.55052	1.50499	ERCC1;RAD23A
Other types of O-glycan biosynthesis	2/47	0.654115	0	0	1.55052	1.50499	MFNG;RFNG
Intestinal immune network for IgA production	2/48	0.660809	0	0	1.51673	1.43281	TGFB1;MAP3K14
Valine, leucine and isoleucine degradation	2/48	0.660809	0	0	1.51673	1.43281	BCKDHA;ACSF3
Parkinson disease	8/249	0.660809	0	0	1.15887	1.08172	KLC4;NDUFS8;UBA7;NDUFS7;UBA1;CYC1;ATP5F1D;NDUFV1
Cocaine addiction	2/49	0.660809	0	0	1.48439	1.36494	ATF6B;RELA
Fatty acid biosynthesis	2022-01-18	0.660809	0	0	2.05143	1.88362	ACSF3
Other glycan degradation	2022-01-18	0.660809	0	0	2.05143	1.88362	HEXD
Regulation of actin cytoskeleton	7/218	0.66924	0	0	1.15789	1.04053	MYL5;MAP2K2;ARAF;ARHGEF1;PIP5K1C;PPP1R12C;VAV1
Glycosaminoglycan degradation	2022-01-19	0.679208	0	0	1.93736	1.69913	IDUA
Platelet activation	4/124	0.739989	0	0	1.16258	0.912094	AKT2;ARHGEF1;RASGRP2;FERMT3
Coronavirus disease	7/232	0.754119	0	0	1.08505	0.817726	IRAK1;IRF3;IKBKG;TYK2;FAU;RPL28;RELA
Legionellosis	2/57	0.754119	0	0	1.26795	0.944182	HSF1;RELA
Th1 and Th2 cell differentiation	3/92	0.754119	0	0	1.1754	0.873659	IKBKG;TYK2;RELA
Mannose type O-glycan biosynthesis	2022-01-23	0.754119	0	0	1.58479	1.16791	FKRP
Lysosome	4/128	0.754119	0	0	1.12484	0.82384	GGA1;AP1G2;IDUA;AP3D1
Purine metabolism	4/129	0.758634	0	0	1.11578	0.803277	GUK1;ENTPD6;AK1;AMPD2
Focal adhesion	6/201	0.760379	0	0	1.07285	0.762173	MYL5;BAD;AKT2;PIP5K1C;PPP1R12C;VAV1
Prion disease	8/273	0.760379	0	0	1.0526	0.741788	KLC4;NDUFS8;NDUFS7;ATF6B;BAD;CYC1;ATP5F1D;NDUFV1
alpha-Linolenic acid metabolism	2022-01-25	0.775483	0	0	1.45257	0.985807	PLA2G6
Arachidonic acid metabolism	2/61	0.775823	0	0	1.18175	0.793986	PTGES2;PLA2G6
Folate biosynthesis	2022-01-26	0.781588	0	0	1.3944	0.908998	FPGS
Glycosylphosphatidylinositol (GPI)-anchor biosynthesis	2022-01-26	0.781588	0	0	1.3944	0.908998	GPAA1
AGE-RAGE signaling pathway in diabetic complications	3/100	0.791993	0	0	1.07802	0.681778	TGFB1;AKT2;RELA
GnRH secretion	2/64	0.792189	0	0	1.12439	0.700015	MAP2K2;AKT2
Melanogenesis	3/101	0.792189	0	0	1.06696	0.661349	MAP2K2;DVL1;DVL2
Inflammatory bowel disease	2/65	0.793403	0	0	1.10649	0.671693	TGFB1;RELA
Fluid shear stress and atherosclerosis	4/139	0.793403	0	0	1.0326	0.625876	AKT2;IKBKG;MAP2K7;RELA
Linoleic acid metabolism	2022-01-29	0.806834	0	0	1.24481	0.721564	PLA2G6
Long-term potentiation	2/67	0.806834	0	0	1.07233	0.619037	MAP2K2;ARAF
Pentose phosphate pathway	2022-01-30	0.815343	0	0	1.20182	0.670557	PFKL
Glucagon signaling pathway	3/107	0.815343	0	0	1.00509	0.552305	CRTC2;PFKL;AKT2
Circadian rhythm	2022-01-31	0.815343	0	0	1.1617	0.624171	NR1D1
Galactose metabolism	2022-01-31	0.815343	0	0	1.1617	0.624171	PFKL
RNA polymerase	2022-01-31	0.815343	0	0	1.1617	0.624171	POLR2E
Alcoholism	5/186	0.826617	0	0	0.962155	0.498166	HDAC5;HDAC10;ATF6B;ARAF;HDAC7
Base excision repair	1/33	0.834143	0	0	1.08898	0.543226	MUTYH
p53 signaling pathway	2/73	0.834143	0	0	0.981406	0.487959	PIDD1;TSC2
Propanoate metabolism	1/34	0.841012	0	0	1.05593	0.507822	BCKDHA
Leukocyte transendothelial migration	3/114	0.841012	0	0	0.941368	0.449633	MYL5;VAV1;SIPA1
Bacterial invasion of epithelial cells	2/77	0.8571	0	0	0.928873	0.418519	ELMO3;DNM2
Mucin type O-glycan biosynthesis	1/36	0.8571	0	0	0.995486	0.445434	ST6GALNAC4
Growth hormone synthesis, secretion and action	3/119	0.865457	0	0	0.900559	0.389203	MAP2K2;ATF6B;AKT2
Primary immunodeficiency	1/38	0.873995	0	0	0.941579	0.392471	IKBKG
Peroxisome	2/82	0.885041	0	0	0.870594	0.347153	PEX16;PEX14
Natural killer cell mediated cytotoxicity	3/131	0.927501	0	0	0.815625	0.277247	MAP2K2;ARAF;VAV1
ABC transporters	1/45	0.927501	0	0	0.791497	0.259456	ABCA7
cAMP signaling pathway	5/216	0.927501	0	0	0.82407	0.266468	MAP2K2;BAD;AKT2;VAV1;RELA
Morphine addiction	2/91	0.927501	0	0	0.782192	0.250847	GRK2;GRK6
Proteasome	1/46	0.927501	0	0	0.773868	0.245328	PSMB10
Carbohydrate digestion and absorption	1/47	0.927501	0	0	0.757006	0.232127	AKT2
GnRH signaling pathway	2/93	0.927501	0	0	0.764922	0.23378	MAP2K2;MAP2K7
Estrogen signaling pathway	3/137	0.927501	0	0	0.778862	0.234738	MAP2K2;ATF6B;AKT2
Ether lipid metabolism	1/49	0.927501	0	0	0.725389	0.208216	PLA2G6
Sphingolipid metabolism	1/49	0.927501	0	0	0.725389	0.208216	SPHK2
Arginine and proline metabolism	1/50	0.927501	0	0	0.710548	0.19738	PYCR2
Cholesterol metabolism	1/50	0.927501	0	0	0.710548	0.19738	STARD3
Malaria	1/50	0.927501	0	0	0.710548	0.19738	TGFB1
N-Glycan biosynthesis	1/50	0.927501	0	0	0.710548	0.19738	ALG12
Aldosterone synthesis and secretion	2/98	0.929019	0	0	0.724895	0.196491	ATF6B;PRKD2
Endocrine and other factor-regulated calcium reabsorption	1/53	0.937384	0	0	0.669452	0.168699	DNM2
Glycosaminoglycan biosynthesis	1/53	0.937384	0	0	0.669452	0.168699	B3GAT3
Amoebiasis	2/102	0.937493	0	0	0.695755	0.171374	TGFB1;RELA
Retrograde endocannabinoid signaling	3/148	0.937493	0	0	0.719366	0.173754	NDUFS8;NDUFS7;NDUFV1
Regulation of lipolysis in adipocytes	1/55	0.937493	0	0	0.644591	0.152323	AKT2
Adrenergic signaling in cardiomyocytes	3/150	0.937493	0	0	0.709505	0.16459	ATF6B;PPP2R1A;AKT2
Drug metabolism	2/108	0.945727	0	0	0.656169	0.140047	UCK1;UCKL1
Ribosome biogenesis in eukaryotes	2/108	0.945727	0	0	0.656169	0.140047	TBL3;REXO1
Cortisol synthesis and secretion	1/65	0.980437	0	0	0.543593	0.0937806	ATF6B
Glycolysis / Gluconeogenesis	1/67	0.985842	0	0	0.527066	0.0854795	PFKL
Retinol metabolism	1/68	0.985898	0	0	0.519173	0.0816467	DGAT1
Amphetamine addiction	1/69	0.985898	0	0	0.511511	0.0780089	ATF6B
PPAR signaling pathway	1/74	0.990001	0	0	0.476353	0.0623703	RXRB
Oocyte meiosis	2/129	0.990001	0	0	0.547074	0.0707899	PPP2R1A;ANAPC2
Thyroid hormone synthesis	1/75	0.990001	0	0	0.469892	0.0596871	ATF6B
Gastric acid secretion	1/76	0.990001	0	0	0.463603	0.0571331	SLC4A2
Antigen processing and presentation	1/78	0.990001	0	0	0.451514	0.0523846	TAPBP
Synaptic vesicle cycle	1/78	0.990001	0	0	0.451514	0.0523846	DNM2
Insulin secretion	1/86	0.990001	0	0	0.40885	0.0373341	ATF6B
Cardiac muscle contraction	1/87	0.990001	0	0	0.404075	0.035817	CYC1
Gap junction	1/88	0.990001	0	0	0.39941	0.0343675	MAP2K2
Bile secretion	1/90	0.990001	0	0	0.390394	0.031658	SLC4A2
Hypertrophic cardiomyopathy	1/90	0.990001	0	0	0.390394	0.031658	TGFB1
Rheumatoid arthritis	1/93	0.990001	0	0	0.377605	0.0280224	TGFB1
Salivary secretion	1/93	0.990001	0	0	0.377605	0.0280224	SLC4A2
Oxytocin signaling pathway	2/154	0.990001	0	0	0.456503	0.0324875	MAP2K2;PPP1R12C
Dilated cardiomyopathy	1/96	0.990001	0	0	0.365624	0.0248378	TGFB1
Ribosome	2/158	0.990001	0	0	0.444706	0.0287467	FAU;RPL28
Inflammatory mediator regulation of TRP channels	1/98	0.990001	0	0	0.358048	0.0229345	PLA2G6
Hematopoietic cell lineage	1/99	0.990001	0	0	0.354377	0.0220426	CD37
JAK-STAT signaling pathway	2/162	0.990001	0	0	0.433498	0.0254493	AKT2;TYK2
Pancreatic secretion	1/102	0.990001	0	0	0.343797	0.0195849	SLC4A2
Cholinergic synapse	1/113	0.993767	0	0	0.309855	0.0128086	AKT2
Serotonergic synapse	1/113	0.993767	0	0	0.309855	0.0128086	ARAF
Glutamatergic synapse	1/114	0.993767	0	0	0.307097	0.0123312	GRK2
Phagosome	1/152	0.999993	0	0	0.229363	0.00307879	HGS
Axon guidance	1/182	0.999993	0	0	0.191049	0.0010855	MYL5
RNA transport	1/186	0.999993	0	0	0.18688	0.000946934	UPF1
MicroRNAs in cancer	2/310	0.999993	0	0	0.223465	0.000325427	HDAC5;MAP2K2
Calcium signaling pathway	1/240	0.999993	0	0	0.14425	0.000155987	SPHK2
Cytokine-cytokine receptor interaction	1/295	0.999993	0	0	0.116929	2.63843e-05	TGFB1
Neuroactive ligand-receptor interaction	1/341	0.999993	0	0	0.100866	6.30655e-06	DRD4
Olfactory transduction	1/440	0.999993	0	0	0.0777146	5.41157e-07	GRK2

## Sheet: Supplementary Table 3
Supplementary Table 3. KEGG enriched pathways of PARP10 negatively co-expressed genes (r < -0.5, P < 0.05).
Term	Overlap	Adjusted P-value	Old P-value	Old Adjusted P-value	Odds Ratio	Combined Score	Genes
RNA transport	5/186	0.28346084841601893	0	0	6.122353963622819	38.509397875532784	SUMO1;SUMO2;EIF3J;EIF4E;EIF3A
Terpenoid backbone biosynthesis	2/22	0.28346084841601893	0	0	21.61521739130435	115.63833187122067	NUS1;ZMPSTE24
Protein export	2/23	0.28346084841601893	0	0	20.58488612836439	108.31634113357939	SPCS3;SRP9
Protein processing in endoplasmic reticulum	4/171	0.2892682310254613	0	0	5.253226879574185	24.944359456948654	EDEM3;ATXN3;CANX;PLAA
Pentose and glucuronate interconversions	2/34	0.2892682310254613	0	0	13.501358695652174	60.74369859051535	UGDH;UGP2
Amoebiasis	3/102	0.2892682310254613	0	0	6.595737595737596	28.98402676264153	GNAQ;PIK3CB;RAB5A
Longevity regulating pathway	3/102	0.2892682310254613	0	0	6.595737595737596	28.98402676264153	RPS6KB1;PIK3CB;EIF4E
HIF-1 signaling pathway	3/109	0.3023011381629684	0	0	6.157992950445781	25.966756790503847	RPS6KB1;PIK3CB;EIF4E
Amino sugar and nucleotide sugar metabolism	2/48	0.34003099433075096	0	0	9.38563327032136	36.06913972379576	UGDH;UGP2
Chemical carcinogenesis	4/239	0.34003099433075096	0	0	3.7202836879432626	13.535330910399944	RPS6KB1;PTGES3;PIK3CB;KPNA3
Insulin signaling pathway	3/137	0.34003099433075096	0	0	4.864359521075939	17.602036565118887	RPS6KB1;PIK3CB;EIF4E
Fluid shear stress and atherosclerosis	3/139	0.34003099433075096	0	0	4.792340012928248	17.16340612302813	SUMO1;SUMO2;PIK3CB
Spinocerebellar ataxia	3/143	0.34003099433075096	0	0	4.65447409733124	16.33252266577057	ATXN3;GNAQ;PIK3CB
Salmonella infection	4/249	0.34003099433075096	0	0	3.566621315192744	12.512592371432135	PIK3CB;ACBD3;KPNA3;RAB5A
Endocytosis	4/252	0.34003099433075096	0	0	3.5229390681003583	12.226482396155761	ARF4;SNX4;VPS4B;RAB5A
mTOR signaling pathway	3/154	0.3520773773274508	0	0	4.313004875918783	14.326278029328828	RPS6KB1;PIK3CB;EIF4E
GnRH secretion	2/64	0.3520773773274508	0	0	6.957924263674614	23.03460758568978	GNAQ;PIK3CB
Acute myeloid leukemia	2/67	0.36141051286189046	0	0	6.635785953177257	21.41524387842656	RPS6KB1;PIK3CB
Thyroid hormone synthesis	2/75	0.4081218967977195	0	0	5.906194163192376	17.86033413867896	GNAQ;CANX
Pancreatic cancer	2/76	0.4081218967977195	0	0	5.826086956521739	17.480145823147954	RPS6KB1;PIK3CB
ErbB signaling pathway	2/85	0.4618233494235388	0	0	5.1919853326348875	14.547669690980971	RPS6KB1;PIK3CB
Colorectal cancer	2/86	0.4618233494235388	0	0	5.12991718426501	14.268335220264353	RPS6KB1;PIK3CB
PD-L1 expression and PD-1 checkpoint pathway in cancer	2/89	0.4690795786932611	0	0	4.9522738630684655	13.476895532994504	RPS6KB1;PIK3CB
Fc gamma R-mediated phagocytosis	2/97	0.47511031316897107	0	0	4.533409610983981	11.660109641099526	RPS6KB1;PIK3CB
Choline metabolism in cancer	2/98	0.47511031316897107	0	0	4.485960144927536	11.458876515531749	RPS6KB1;PIK3CB
Inflammatory mediator regulation of TRP channels	2/98	0.47511031316897107	0	0	4.485960144927536	11.458876515531749	GNAQ;PIK3CB
Human immunodeficiency virus 1 infection	3/212	0.47511031316897107	0	0	3.1069456858930544	7.91723651850467	RPS6KB1;GNAQ;PIK3CB
Chagas disease	2/102	0.4853796469856378	0	0	4.305652173913043	10.70309720614634	GNAQ;PIK3CB
Human cytomegalovirus infection	3/225	0.4853796469856378	0	0	2.923076923076923	7.0483817263651325	RPS6KB1;GNAQ;PIK3CB
Insulin resistance	2/108	0.4853796469856378	0	0	4.06070549630845	9.699819970882064	RPS6KB1;PIK3CB
Ribosome biogenesis in eukaryotes	2/108	0.4853796469856378	0	0	4.06070549630845	9.699819970882064	FCF1;MPHOSPH10
Cholinergic synapse	2/113	0.49570689725728495	0	0	3.8768115942028984	8.965251342321519	GNAQ;PIK3CB
Sphingolipid signaling pathway	2/119	0.49570689725728495	0	0	3.6768859160163507	8.185773852540358	GNAQ;PIK3CB
Growth hormone synthesis, secretion and action	2/119	0.49570689725728495	0	0	3.6768859160163507	8.185773852540358	GNAQ;PIK3CB
AMPK signaling pathway	2/120	0.49570689725728495	0	0	3.6455416359616803	8.065441868527424	RPS6KB1;PIK3CB
Shigellosis	3/246	0.49570689725728495	0	0	2.667616334283001	5.89724059016947	RPS6KB1;UBE2V2;PIK3CB
Platelet activation	2/124	0.49570689725728495	0	0	3.5253029223093373	7.60870573405766	GNAQ;PIK3CB
Ascorbate and aldarate metabolism	1/30	0.49570689725728495	0	0	7.370040786058584	14.930232938854378	UGDH
Apelin signaling pathway	2/137	0.49570689725728495	0	0	3.1837359098228664	6.355382625728387	RPS6KB1;GNAQ
Autophagy	2/137	0.49570689725728495	0	0	3.1837359098228664	6.355382625728387	RPS6KB1;PIK3CB
Yersinia infection	2/137	0.49570689725728495	0	0	3.1837359098228664	6.355382625728387	GNAQ;PIK3CB
Estrogen signaling pathway	2/137	0.49570689725728495	0	0	3.1837359098228664	6.355382625728387	GNAQ;PIK3CB
Galactose metabolism	1/31	0.49570689725728495	0	0	7.124014336917563	14.21446168945804	UGP2
Ubiquitin mediated proteolysis	2/140	0.49570689725728495	0	0	3.114051669817265	6.108140811357775	UBE2W;UBE2K
Breast cancer	2/147	0.49570689725728495	0	0	2.9626686656671666	5.581490998053847	RPS6KB1;PIK3CB
Retrograde endocannabinoid signaling	2/148	0.49570689725728495	0	0	2.942227516378797	5.511504829388989	NDUFA5;GNAQ
Gastric cancer	2/149	0.49570689725728495	0	0	2.9220644779650993	5.442739164658202	RPS6KB1;PIK3CB
Starch and sucrose metabolism	1/36	0.49570689725728495	0	0	6.104761904761904	11.33726052426851	UGP2
Spliceosome	2/150	0.49570689725728495	0	0	2.902173913043478	5.375165640739974	DDX46;PRPF40A
African trypanosomiasis	1/37	0.49570689725728495	0	0	5.934886499402628	10.872626559544205	GNAQ
Alanine, aspartate and glutamate metabolism	1/37	0.49570689725728495	0	0	5.934886499402628	10.872626559544205	ADSS2
Aldosterone-regulated sodium reabsorption	1/37	0.49570689725728495	0	0	5.934886499402628	10.872626559544205	PIK3CB
Phagosome	2/152	0.49570689725728495	0	0	2.8631884057971013	5.243485696995343	CANX;RAB5A
Non-alcoholic fatty liver disease	2/155	0.5016029770166723	0	0	2.8066211992043195	5.054244106312554	NDUFA5;PIK3CB
Necroptosis	2/159	0.5123441609234881	0	0	2.734561063417336	4.816360341426055	H2AZ2;VPS4B
Pathways of neurodegeneration	4/475	0.5298767542063578	0	0	1.833923095069592	3.096102868060337	ATXN3;NDUFA5;GNAQ;RAB5A
Hepatocellular carcinoma	2/168	0.5298767542063578	0	0	2.585123101100052	4.334808352655689	RPS6KB1;PIK3CB
Vasopressin-regulated water reabsorption	1/44	0.5298767542063578	0	0	4.9669917479369845	8.317397831132554	RAB5A
Type II diabetes mellitus	1/46	0.5373268164784645	0	0	4.745758661887694	7.757355193343563	PIK3CB
Carbohydrate digestion and absorption	1/47	0.5373268164784645	0	0	4.642356241234221	7.498939021140666	PIK3CB
Arginine and proline metabolism	1/50	0.5373268164784645	0	0	4.357472021066491	6.79849904676328	SMS
Cysteine and methionine metabolism	1/50	0.5373268164784645	0	0	4.357472021066491	6.79849904676328	SMS
Endocrine and other factor-regulated calcium reabsorption	1/53	0.5373268164784645	0	0	4.10545905707196	6.193689510005753	GNAQ
Neutrophil extracellular trap formation	2/189	0.5373268164784645	0	0	2.2923738665426643	3.4405580061036805	H2AZ2;PIK3CB
Chemokine signaling pathway	2/192	0.5373268164784645	0	0	2.2558352402745996	3.3338042544276973	GNAQ;PIK3CB
Regulation of lipolysis in adipocytes	1/55	0.5373268164784645	0	0	3.953006770211071	5.8349507554646145	PIK3CB
PI3K-Akt signaling pathway	3/354	0.5373268164784645	0	0	1.836667605898375	2.6815667788715154	RPS6KB1;PIK3CB;EIF4E
Glutathione metabolism	1/57	0.5373268164784645	0	0	3.8114439324116742	5.506877939789336	SMS
Endometrial cancer	1/58	0.5373268164784645	0	0	3.7443878513488023	5.353223842224764	PIK3CB
VEGF signaling pathway	1/59	0.5373268164784645	0	0	3.6796440489432705	5.20596137193734	PIK3CB
Long-term depression	1/60	0.5373268164784645	0	0	3.617094951704028	5.064729217695601	GNAQ
Diabetic cardiomyopathy	2/203	0.5373268164784645	0	0	2.1311918667531904	2.9782756958536605	NDUFA5;PIK3CB
Arachidonic acid metabolism	1/61	0.5373268164784645	0	0	3.55663082437276	4.929191927960233	PTGES3
Proteoglycans in cancer	2/205	0.5373268164784645	0	0	2.1099807239237522	2.9191395440639614	RPS6KB1;PIK3CB
Alzheimer disease	3/369	0.5373268164784645	0	0	1.7600432354530715	2.43285443416033	NDUFA5;GNAQ;PIK3CB
Rap1 signaling pathway	2/210	0.5373268164784645	0	0	2.05873745819398	2.7779621261974095	GNAQ;PIK3CB
Cortisol synthesis and secretion	1/65	0.5373268164784645	0	0	3.3336693548387095	4.438068423870862	GNAQ
Long-term potentiation	1/67	0.5373268164784645	0	0	3.2323232323232323	4.219514652028844	GNAQ
Fc epsilon RI signaling pathway	1/68	0.5373268164784645	0	0	3.1839191141068848	4.116203532141284	PIK3CB
Human T-cell leukemia virus 1 infection	2/219	0.5373268164784645	0	0	1.9724504107393308	2.54576397123459	CANX;PIK3CB
Renal cell carcinoma	1/69	0.5373268164784645	0	0	3.1369386464263123	4.016607976369818	PIK3CB
Renin secretion	1/69	0.5373268164784645	0	0	3.1369386464263123	4.016607976369818	GNAQ
Central carbon metabolism in cancer	1/70	0.5373268164784645	0	0	3.0913199314321336	3.920547096946552	PIK3CB
Prolactin signaling pathway	1/70	0.5373268164784645	0	0	3.0913199314321336	3.920547096946552	PIK3CB
Melanoma	1/72	0.5373268164784645	0	0	3.0039376041193395	3.738360720374842	PIK3CB
Non-small cell lung cancer	1/72	0.5373268164784645	0	0	3.0039376041193395	3.738360720374842	PIK3CB
Inositol phosphate metabolism	1/73	0.5373268164784645	0	0	2.9620669056152926	3.6519259376872046	PIK3CB
Thermogenesis	2/232	0.5373268164784645	0	0	1.8597353497164462	2.2533129418975446	NDUFA5;RPS6KB1
Ras signaling pathway	2/232	0.5373268164784645	0	0	1.8597353497164462	2.2533129418975446	PIK3CB;RAB5A
Glioma	1/75	0.5373268164784645	0	0	2.881720430107527	3.4876675717165058	PIK3CB
Chronic myeloid leukemia	1/76	0.5373268164784645	0	0	2.8431541218637992	3.4095861178637743	PIK3CB
Gastric acid secretion	1/76	0.5373268164784645	0	0	2.8431541218637992	3.4095861178637743	GNAQ
Bacterial invasion of epithelial cells	1/77	0.5373478783066769	0	0	2.805602716468591	3.334043457403817	PIK3CB
Antigen processing and presentation	1/78	0.5373478783066769	0	0	2.769026672252479	3.2609282325764797	CANX
RNA degradation	1/79	0.5373478783066769	0	0	2.733388475323959	3.1901352632985813	C1D
B cell receptor signaling pathway	1/81	0.5428283054752605	0	0	2.664784946236559	3.0551238218857484	PIK3CB
Insulin secretion	1/86	0.5583491538613347	0	0	2.5074003795066413	2.7518930372832235	GNAQ
Gap junction	1/88	0.5583491538613347	0	0	2.449511803238166	2.6427223714548616	GNAQ
Small cell lung cancer	1/92	0.5583491538613347	0	0	2.3413683091102446	2.4423306175433335	PIK3CB
Salivary secretion	1/93	0.5583491538613347	0	0	2.315801776531089	2.395649974707396	GNAQ
GnRH signaling pathway	1/93	0.5583491538613347	0	0	2.315801776531089	2.395649974707396	GNAQ
TGF-beta signaling pathway	1/94	0.5583491538613347	0	0	2.290785061856862	2.350236106834253	RPS6KB1
Circadian entrainment	1/97	0.5583491538613347	0	0	2.218862007168459	2.2211454519551257	GNAQ
Phosphatidylinositol signaling system	1/97	0.5583491538613347	0	0	2.218862007168459	2.2211454519551257	PIK3CB
Prostate cancer	1/97	0.5583491538613347	0	0	2.218862007168459	2.2211454519551257	PIK3CB
Prion disease	2/273	0.5583491538613347	0	0	1.5750842291031606	1.574166309001918	NDUFA5;PIK3CB
Aldosterone synthesis and secretion	1/98	0.5583491538613347	0	0	2.195876288659794	2.180359077073003	GNAQ
AGE-RAGE signaling pathway in diabetic complications	1/100	0.5583491538613347	0	0	2.1512979254914737	2.101919815261755	PIK3CB
Progesterone-mediated oocyte maturation	1/100	0.5583491538613347	0	0	2.1512979254914737	2.101919815261755	PIK3CB
Melanogenesis	1/101	0.5583491538613347	0	0	2.129677419354839	2.0641954116468115	GNAQ
Pancreatic secretion	1/102	0.5583491538613347	0	0	2.1084850420525925	2.027422724538319	GNAQ
T cell receptor signaling pathway	1/104	0.5583491538613347	0	0	2.0673347948637644	1.956605796187279	PIK3CB
Toll-like receptor signaling pathway	1/104	0.5583491538613347	0	0	2.0673347948637644	1.956605796187279	PIK3CB
C-type lectin receptor signaling pathway	1/104	0.5583491538613347	0	0	2.0673347948637644	1.956605796187279	PIK3CB
Parathyroid hormone synthesis, secretion and action	1/106	0.56092644952774	0	0	2.027752176139273	1.889228798205254	GNAQ
Glucagon signaling pathway	1/107	0.56092644952774	0	0	2.0085209981740717	1.8567606158160717	GNAQ
TNF signaling pathway	1/112	0.5691192021236784	0	0	1.917562724014337	1.705617895170707	PIK3CB
Serotonergic synapse	1/113	0.5691192021236784	0	0	1.9003456221198156	1.6774685632988202	GNAQ
Glutamatergic synapse	1/114	0.5691192021236784	0	0	1.883433247692454	1.6499629711192532	GNAQ
Leukocyte transendothelial migration	1/114	0.5691192021236784	0	0	1.883433247692454	1.6499629711192532	PIK3CB
Huntington disease	2/306	0.5730187441846752	0	0	1.4017448512585813	1.206779990397118	NDUFA5;GNAQ
Neurotrophin signaling pathway	1/119	0.575468521018057	0	0	1.8031711317659924	1.5214334241800327	PIK3CB
Thyroid hormone signaling pathway	1/121	0.575468521018057	0	0	1.7729390681003585	1.4738989191755703	PIK3CB
Osteoclast differentiation	1/127	0.575468521018057	0	0	1.6880013654207202	1.3430133726825788	PIK3CB
Purine metabolism	1/129	0.575468521018057	0	0	1.6614583333333333	1.3029387269935697	ADSS2
Relaxin signaling pathway	1/129	0.575468521018057	0	0	1.6614583333333333	1.3029387269935697	PIK3CB
Pathways in cancer	3/531	0.575468521018057	0	0	1.2099150849150848	0.9472394326875606	RPS6KB1;GNAQ;PIK3CB
FoxO signaling pathway	1/131	0.575468521018057	0	0	1.6357320099255583	1.2644828133338064	PIK3CB
Natural killer cell mediated cytotoxicity	1/131	0.575468521018057	0	0	1.6357320099255583	1.2644828133338064	PIK3CB
Human papillomavirus infection	2/331	0.575468521018057	0	0	1.2935773754460156	0.997257053620551	RPS6KB1;PIK3CB
Dopaminergic synapse	1/132	0.575468521018057	0	0	1.6231634244438973	1.2458349611402808	GNAQ
Vascular smooth muscle contraction	1/133	0.575468521018057	0	0	1.6107852720755946	1.2275602076257284	GNAQ
Oxidative phosphorylation	1/133	0.575468521018057	0	0	1.6107852720755946	1.2275602076257284	NDUFA5
Systemic lupus erythematosus	1/135	0.5773360252615484	0	0	1.5865832129674209	1.1920911071423785	H2AZ2
Measles	1/139	0.5851213861862576	0	0	1.5402836216300453	1.1252197049860213	PIK3CB
Apoptosis	1/142	0.5882442406356898	0	0	1.5072828490810646	1.0783603452195967	PIK3CB
Signaling pathways regulating pluripotency of stem cells	1/143	0.5882442406356898	0	0	1.4965924579736483	1.0633267624911829	PIK3CB
Phospholipase D signaling pathway	1/148	0.5968900924366791	0	0	1.4453222149074683	0.9922412363226275	PIK3CB
Adrenergic signaling in cardiomyocytes	1/150	0.5968900924366791	0	0	1.4257775853359314	0.9655924702858366	GNAQ
Amyotrophic lateral sclerosis	2/364	0.5968900924366791	0	0	1.1736728320922412	0.784253407059539	NDUFA5;RAB5A
Oxytocin signaling pathway	1/154	0.5968900924366791	0	0	1.388221238316115	0.9150981043281485	GNAQ
Cushing syndrome	1/155	0.5968900924366791	0	0	1.379136992040218	0.9030273054750365	GNAQ
Cellular senescence	1/156	0.5968900924366791	0	0	1.3701699618453	0.8911675397435028	PIK3CB
Hepatitis C	1/157	0.5968900924366791	0	0	1.361317893575958	0.879514016990994	PIK3CB
Hepatitis B	1/162	0.6012572284907884	0	0	1.3187070059440327	0.8241816472793192	PIK3CB
JAK-STAT signaling pathway	1/162	0.6012572284907884	0	0	1.3187070059440327	0.8241816472793192	PIK3CB
cGMP-PKG signaling pathway	1/167	0.6093361268697841	0	0	1.2786630392537894	0.7733597929475633	GNAQ
Influenza A	1/172	0.6170251102984925	0	0	1.240960825001572	0.7265822063373675	PIK3CB
Tuberculosis	1/180	0.6271091181546824	0	0	1.185018321619511	0.6591523514975058	RAB5A
NOD-like receptor signaling pathway	1/181	0.6271091181546824	0	0	1.1783751493428913	0.6513059812028366	SUGT1
Axon guidance	1/182	0.6271091181546824	0	0	1.1718053822847978	0.6435804898839274	PIK3CB
Alcoholism	1/186	0.6315735116287153	0	0	1.146236559139785	0.6138404458258389	H2AZ2
Kaposi sarcoma-associated herpesvirus infection	1/193	0.6419989613122351	0	0	1.104054659498208	0.5659352162795825	PIK3CB
Focal adhesion	1/201	0.6492448238938847	0	0	1.059462365591398	0.5169070603564077	PIK3CB
Epstein-Barr virus infection	1/202	0.6492448238938847	0	0	1.0541379125875996	0.5111665739727502	PIK3CB
Viral carcinogenesis	1/203	0.6492448238938847	0	0	1.0488661769402747	0.5055071599349412	PIK3CB
Lipid and atherosclerosis	1/215	0.6641832917169869	0	0	0.9894482966536027	0.44341969974207335	PIK3CB
cAMP signaling pathway	1/216	0.6641832917169869	0	0	0.9847961990497625	0.43869295842203554	PIK3CB
Regulation of actin cytoskeleton	1/218	0.6641832917169869	0	0	0.9756206332689163	0.42942854521037915	PIK3CB
Coronavirus disease	1/232	0.6835832471940595	0	0	0.9158404319694642	0.3710064528691435	PIK3CB
Calcium signaling pathway	1/240	0.6920340217701481	0	0	0.8848247626760246	0.342057523725173	GNAQ
Parkinson disease	1/249	0.701399981707941	0	0	0.8523239680887964	0.3127577742127389	NDUFA5
MicroRNAs in cancer	1/310	0.7752280705687733	0	0	0.6819431395065595	0.17779228415811427	PIK3CB
Herpes simplex virus 1 infection	1/498	0.9070613968803295	0	0	0.4199173535838688	0.04096089658079079	PIK3CB
